# Supplementary material for: Structure Sensitivity of CO2 Conversion over Nickel Metal Nanoparticles Explained by Micro-Kinetics Simulations
Source: PubMed Central journal article supplement (PMC9795468; doi:10.1021/jacsau.2c00430), 2022-10-14
Supplement: au2c00430_si_001.pdf [file au2c00430_si_001.pdf]

# Supporting Information: Structure Sensitivity of CO<sub>2</sub> Conversion over Nickel Metal Nanoparticles Explained by Micro-Kinetics Simulations

Ellen B. Sterk<sup>a</sup>, Anne-Eva Nieuwelink<sup>a</sup>, M. Monai<sup>a</sup>, Jaap N. Louwen<sup>a</sup>, Eelco T.C. Vogt<sup>a</sup>, Ivo A.W. Filot<sup>b,\*</sup> and Bert M. Weckhuysen<sup>a,\*</sup>

<sup>a</sup>*Inorganic Chemistry and Catalysis group, Debye Institute for Nanomaterials Science, Utrecht University, Universiteitsweg 99, 3584 CG Utrecht, The Netherlands*

<sup>b</sup>*Schuit Institute of Catalysis, Department of Chemical Engineering and Chemistry, Eindhoven University of Technology, PO Box 513 5600 MB Eindhoven, The Netherlands*

\*Email: I.A.W.Filot@tue.nl, B.M.Weckhuysen@uu.nl

## Table of Contents

|   |                                                                       |         |
|---|-----------------------------------------------------------------------|---------|
| A | Hard or soft pseudopotential                                          | 3 - 4   |
| B | Numerical approach                                                    | 5       |
| C | References adsorption energies                                        | 6 - 9   |
| D | Stable geometries of reaction intermediates                           | 10 - 28 |
| E | Table adsorption energy of stable geometries                          | 29 - 33 |
| F | Geometries of elementary reaction steps                               | 34 - 42 |
| G | Potential energy diagrams                                             |         |
|   | Primary pathways                                                      | 43 - 45 |
|   | Reaction pathway based on flux diagrams                               | 46 - 56 |
| H | Microkinetics simulations                                             |         |
|   | Input                                                                 | 57 - 62 |
|   | Output                                                                | 63 - 65 |
| I | Sensitivity analysis on the correction of CO <sup>*</sup> overbinding | 66 - 74 |
| J | Sensitivity analysis on the lateral interaction potential             | 75 - 79 |
| K | Wulff constructions                                                   |         |
|   | Wulff constructed nanoparticles                                       | 80 - 81 |
|   | Turnover frequency                                                    | 82 - 84 |

## A Hard or Soft Pseudopotential

In this work we used pseudopotentials for Ni, H, C and O atoms. In order to be able to compare results within the obtained data set we need to use the same settings for each calculation. This means that each calculation needs to be performed with the same ENCUT value, determined by the highest default cutoff (or ENMAX) of the atoms Ni, H, C and O. For this set of atoms, the highest default cutoff belongs to oxygen and carbon for both the soft and the hard pseudopotentials. An increase in the cutoff energy generally results in an increase in computational costs, thus this needs to be chosen carefully.

On the VASP site<sup>1</sup>, an important note is made for the usage of PAW pseudopotentials when one needs to calculate dimers with short bonds. As this is the case for the slabs with CO\* adsorbed, we investigated the energetic effect of the hard- and soft PAW-PBE potential. For the hard variant an ENCUT of 700 eV is required, while for the soft one an ENCUT of 400 eV is sufficient.

The adsorption energies of CO\* in the most- and least stable adsorption site for each investigated nickel facet, are listed in Table S 1 below. The energies calculated with the hard pseudopotential are higher compared to the soft pseudopotential, except for CO\* adsorbed atop on Ni(100). In each case the energy difference is within 10 kJ/mol.

Table S 1. Comparison of adsorption energies calculated with hard- and soft- PAW-PBE pseudopotential.

| Adsorption site                     | $E_{\text{PBE}}$ | $E_{\text{PBE,h}}$ | $\Delta E_{\text{PBE-PBE,h}}$ |
|-------------------------------------|------------------|--------------------|-------------------------------|
| Ni(111) T                           | -144.38          | -136.83            | 7.55                          |
| Ni(111) T <sub>h</sub>              | -178.65          | -169.08            | 9.57                          |
| Ni(100) T                           | -147.65          | -150.37            | -2.72                         |
| Ni(100) F                           | -174.93          | -173.21            | 1.72                          |
| Ni(110) T                           | -157.35          | -152.15            | 5.20                          |
| Ni(110) B1                          | -174.60          | -167.47            | 7.15                          |
| Ni(211) T <sub>1</sub>              | -165.05          | -158.45            | 6.60                          |
| Ni(211) T <sub>h</sub> <sup>2</sup> | -186.79          | -176.54            | 10.25                         |

Adsorption energies are ZPE-corrected. Values are given in kJ/mol.

To put this in perspective, we have compared gas phase reaction energies for some relevant reactions by using molecular energies computed by the PBE DFT and with CCSD(T) method (the “gold standard” in computational chemistry), in both cases with a 6-311+G(3df,2pd) basis set. These values, listed in Table S 2, were taken from the NIST Computational Chemistry Comparison and Benchmark DataBase<sup>2</sup>.

<sup>1</sup> VASP. Available PAW potentials. [https://www.vasp.at/wiki/index.php/Available\\_PAW\\_potentials](https://www.vasp.at/wiki/index.php/Available_PAW_potentials) (accessed March 31, 2022).

<sup>2</sup> Computational Chemistry Comparison and Benchmark DataBase. <https://cccbdb.nist.gov> (accessed March 31, 2022).

## A. Hard or Soft Pseudopotential

Table S 2. Gas phase reaction energies of relevant reactions.

| Reaction                                                                            | $E_{\text{reaction PBE}}$ | $E_{\text{reaction CCSD(T)}}$ | $ \Delta $ |
|-------------------------------------------------------------------------------------|---------------------------|-------------------------------|------------|
| $\text{CO}_2 + \text{H}_2 \rightarrow \text{CO} + \text{H}_2\text{O}$               | 76.5                      | 31.6                          | 44.9       |
| $\text{CO} + \text{H}_2 \rightarrow \text{H}_2\text{CO}$                            | -52.8                     | -21.8                         | 31.0       |
| $\text{CO}_2 + 4 \text{H}_2 \rightarrow 2 \text{H}_2\text{O} + \text{CH}_4$         | -222.6                    | -239.1                        | 16.4       |
| $\text{H}_2\text{CO} + 2 \text{H}_2 \rightarrow 2 \text{H}_2\text{O} + \text{CH}_4$ | -246.3                    | -248.9                        | 2.6        |
| $\text{CO} + 3 \text{H}_2 \rightarrow \text{H}_2\text{O} + \text{CH}_4$             | -299.1                    | -270.7                        | 28.5       |

All energies are given in kJ/mol

Approximations need to be balanced in order to avoid wasting computer time. Therefore, in view of the deviations in the calculated thermochemistry of  $\text{CO}_2$  methanation between PBE and CCSD(T), the usage of the soft PAW-PBE potential throughout this work is justified.

## B Numerical Approach

We also did a limited study to gauge the sensitivity of our results to the model and numerical approach chosen.

PAW calculations were done with the GPAW program<sup>3,4,5</sup> version 21.6.0 using the supplied PAW setups (version 0.9.2000), a plane wave cutoff energy of 500 eV and the PBE density functional. The Ni(111) surface was modeled by four layers of 4 by 4 Ni atoms. The bulk unit cell size of FCC Ni was computed to be 3.5291 Å, which leads to unit cell axes of length 9.9818 Å along the slab. The length of the axis perpendicular to the slab was set to 26.1126 Å to have 10 Å of vacuum to both sides of the slab. Periodic boundary conditions were applied for the two axes along the slab; no periodic boundary conditions were applied perpendicular to the slab. A Monkhorst-Pack 4x4x1 k-point mesh was used for sampling the Brillouin zone.

CO was placed on one side of the slab in T, B and Tf coordination mode. We compared the adsorption energy, computed as  $E_{\text{adsorption}} = E_{\text{slab+CO}} - E_{\text{slab}} - E_{\text{CO}}$  and compared these values to those derived from the VASP calculations (see paper for details).

Obtained values are reported in Table S 3. Despite the difference in atomic model, the difference in software and the difference in numerical parameters the results are very close together. We conclude that our results are not critically dependent on the choices made.

Table S 3. CO adsorption energy on Ni(111).

| Adsorption site | Adsorption energy |        |
|-----------------|-------------------|--------|
|                 | VASP              | GPAW   |
| T               | -144.3            | -147.4 |
| B               | -158.8            | -165.3 |
| Tf              | -178.1            | -174.8 |

Values are given in kJ/mol.

<sup>3</sup> Mortensen, J. J.; Hansen, L. B.; Jacobsen, K. W. A Real-Space Grid Implementation of the Projector Augmented Wave Method. *Phys. Rev. B - Condens. Matter Mater. Phys.* **2004**, 71 (3), 1–11. <https://doi.org/10.1103/PhysRevB.71.035109>.

<sup>4</sup> Enkovaara, J.; Rostgaard, C.; Mortensen, J. J.; Chen, J.; Dułak, M.; Ferrighi, L.; Gavnholt, J.; Glinsvad, C.; Haikola, V.; Hansen, H. A.; Kristoffersen, H. H.; Kuisma, M.; Larsen, A. H.; Lehtovaara, L.; Ljungberg, M.; Lopez-Acevedo, O.; Moses, P. G.; Ojanen, J.; Olsen, T.; Petzold, V.; Romero, N. A.; Stausholm-Møller, J.; Strange, M.; Tritsarlis, G. A.; Vanin, M.; Walter, M.; Hammer, B.; Häkkinen, H.; Madsen, G. K. H.; Nieminen, R. M.; Nørskov, J. K.; Puska, M.; Rantala, T. T.; Schiøtz, J.; Thygesen, K. S.; Jacobsen, K. W. Electronic Structure Calculations with GPAW: A Real-Space Implementation of the Projector Augmented-Wave Method. *J. Phys. Condens. Matter* **2010**, 22 (25), 253202. <https://doi.org/10.1088/0953-8984/22/25/253202>.

<sup>5</sup> Hjorth Larsen, A.; Jørgen Mortensen, J.; Blomqvist, J.; Castelli, I. E.; Christensen, R.; Dułak, M.; Friis, J.; Groves, M. N.; Hammer, B.; Hargus, C.; Hermes, E. D.; Jennings, P. C.; Bjerre Jensen, P.; Kermode, J.; Kitchin, J. R.; Leonhard Kolsbjerg, E.; Kubal, J.; Kaasbjerg, K.; Lysgaard, S.; Bergmann Maronsson, J.; Maxson, T.; Olsen, T.; Pastewka, L.; Peterson, A.; Rostgaard, C.; Schiøtz, J.; Schütt, O.; Strange, M.; Thygesen, K. S.; Vegge, T.; Vilhelmsen, L.; Walter, M.; Zeng, Z.; Jacobsen, K. W. The Atomic Simulation Environment - A Python Library for Working with Atoms. *J. Phys. Condens. Matter* **2017**, 29 (27). <https://doi.org/10.1088/1361-648X/aa680e>.

## C References Adsorption Energies

Most stable calculated adsorption energies (in kJ/mol) of relevant reaction intermediates involved in CO<sub>2</sub> methanation on Ni(100), Ni(110), Ni(111) and Ni(211) are compared to values found in literature in the four tables below (Table S 4 to Table S 7). Corresponding adsorption sites are given within brackets.

Table S 4. References in adsorption energy on Ni(100).

| Ni(100)            |                         |              |     |
|--------------------|-------------------------|--------------|-----|
| Adsorbate          | $E_{\text{ads}}$        | Reference    |     |
| CO <sub>2</sub>    | -16.3 (BTT)             | -5.79 (T)    | [1] |
|                    |                         | -13.51 (BTT) | [2] |
| CO                 | -174.8 (F)              | -189.11 (F)  | [1] |
|                    |                         | -196.83 (F)  | [2] |
|                    |                         | -219.02 (F)  | [3] |
| CH <sub>3</sub>    | -233.8 (B)              | -184.29 (B)  | [3] |
| HCOO               | -293.8 (TT over F)      | -277.88 (TB) | [1] |
| HCO                | -264.6 (BB)             | -266.30 (BB) | [1] |
|                    |                         | -303.93 (BB) | [3] |
| H <sub>3</sub> CO  | -251.9 (F)              | -260.51 (F)  | [3] |
| COOH               | -232.9 (TT)             | -260.51 (B)  | [1] |
| H <sub>3</sub> COH | -29.0 (T)               | -25.48 (T)   | [4] |
| OH                 | -388.4 (F)              | -318.40 (F)  | [1] |
|                    |                         | -324.54 (F)  | [3] |
| H <sub>2</sub> O   | -31.1 (T)               | -26.05 (T)   | [1] |
| H                  | -364.5 (F)              | -260.51 (F)  | [1] |
|                    |                         | -273.05 (F)  | [3] |
| O                  | -724.2 (F)              | -542.25 (F)  | [1] |
|                    |                         | -525.84 (F)  | [2] |
| H <sub>2</sub>     | -1 (horizontal above T) | -21.23 (T)   | [1] |

Table S 5. References in adsorption energy on Ni(110).

| Ni(110)          |                                                        |                                                        |     |
|------------------|--------------------------------------------------------|--------------------------------------------------------|-----|
| Adsorbate        | $E_{\text{ads}}$                                       | Reference                                              |     |
| CO <sub>2</sub>  | -41.9 (T <sub>1</sub> T <sub>1</sub> T <sub>1</sub> )  | -24.12 (B <sub>1</sub> )                               | [1] |
|                  |                                                        | -40.52 (T <sub>1</sub> T <sub>1</sub> T <sub>1</sub> ) | [2] |
| CO               | -174.5 (B <sub>1</sub> )                               | -182.36 (B <sub>1</sub> )                              | [1] |
|                  |                                                        | -187.18 (B <sub>1</sub> )                              | [2] |
|                  |                                                        | -317.44 (TT)                                           | [1] |
| HCOO             | -327.8 (T <sub>1</sub> T <sub>1</sub> over lower edge) | -233.49 (B <sub>1</sub> T <sub>1</sub> )               | [1] |
| HCO              | -239.6 (T <sub>f</sub> B <sub>1</sub> )                | -246.04 (B <sub>2</sub> )                              | [1] |
| COOH             | -248.1 (T <sub>1</sub> T <sub>1</sub> over lower edge) | -335.77 (B <sub>1</sub> )                              | [1] |
| OH               | -398.6 (B <sub>1</sub> )                               | -38.59 (T <sub>f</sub> )                               | [1] |
| H <sub>2</sub> O | -38.5 (T <sub>1</sub> )                                | -242.18 (T <sub>f</sub> )                              | [1] |
| H                | -351.6 (B <sub>2</sub> )                               | -479.53 (B <sub>2</sub> )                              | [1] |
| O                | -676.4 (T <sub>f</sub> )                               | -467.95 (T <sub>f</sub> )                              | [2] |
|                  |                                                        | -31.84 (T)                                             | [1] |
| H <sub>2</sub>   | -34.9 (horizontal above T <sub>1</sub> )               |                                                        |     |

Table S 6. References in adsorption energy on Ni(111).

| Adsorbate          | Ni(111)                          |                                       |
|--------------------|----------------------------------|---------------------------------------|
|                    | $E_{\text{ads}}$                 | Reference                             |
| CO <sub>2</sub>    | 24.3 (T <sub>f</sub> TT)         | -8.68 (BTT) [6]                       |
|                    |                                  | -2.89 (B) [1]                         |
|                    |                                  | 29.91 (TT) [2]                        |
|                    |                                  | -1.93 (T) [7]                         |
|                    |                                  | -11.58 (TT) [8]                       |
| CO                 | -178.6 (T <sub>h</sub> )         | -127.36 (T <sub>f</sub> ) [6]         |
|                    |                                  | -182.36 (T <sub>h</sub> ) [1]         |
|                    |                                  | -184.29 (T <sub>h</sub> ) [2]         |
|                    |                                  | -190.08 (T <sub>f</sub> ) [9]         |
|                    |                                  | -171.74 (T <sub>f</sub> ) [7]         |
| C                  | -773.8 (T <sub>h</sub> )         | -201 (T <sub>h</sub> ) [8]            |
|                    |                                  | -530.67 (T <sub>f</sub> ) [6]         |
| CH                 | -603.3 (T <sub>f</sub> )         | -637.77 (T <sub>h</sub> ) [8]         |
|                    |                                  | -543.21 (T <sub>f</sub> ) [6]         |
| CH <sub>2</sub>    | -454.2 (T <sub>f</sub> )         | -659.96 (T <sub>f</sub> ) [8]         |
|                    |                                  | -340.59 (T <sub>f</sub> ) [6]         |
| CH <sub>3</sub>    | -238.3 (T <sub>f</sub> )         | -127.36 (T <sub>f</sub> ) [6]         |
| HCOO               | -277.3 (TT)                      | -196.83 (T <sub>f</sub> ) [9]         |
|                    |                                  | -163.06 (B) [6]                       |
|                    |                                  | -259.55 (TT) [1]                      |
| HCO                | -201.2 (BT over T <sub>f</sub> ) | -291.39 (TT) [8]                      |
|                    |                                  | -211.30 (BT over T <sub>h</sub> ) [1] |
|                    |                                  | -232.53 (B) [9]                       |
| H <sub>2</sub> CO  | -57.7 (T <sub>f</sub> T)         | -240.25 (B) [8]                       |
|                    |                                  | -70.434 (B) [6]                       |
| H <sub>3</sub> CO  | -218.0 (T <sub>h</sub> )         | -99.38 (TT) [9]                       |
|                    |                                  | -249 (T <sub>f</sub> ) [9]            |
| COOH               | -210.9 (BT over T <sub>f</sub> ) | -209.37 (T) [1]                       |
|                    |                                  | -245.07 (BT) [8]                      |
| COH                | -410.5 (T <sub>h</sub> )         | -426.47 (T <sub>f</sub> ) [8]         |
| H <sub>2</sub> COH | -146.7 (BT over T <sub>h</sub> ) | -162.10 (T) [9]                       |
| H <sub>3</sub> COH | -23.6 (T)                        | -14.47 (T) [9]                        |
| OH                 | -364.9 (T <sub>f</sub> )         | -230.60 (T <sub>f</sub> ) [6]         |
|                    |                                  | -299.10 (T <sub>f</sub> ) [1]         |
|                    |                                  | -307 (T <sub>f</sub> ) [9]            |
|                    |                                  | -304.89 (T <sub>f</sub> ) [7]         |
|                    |                                  | -322.26 (T <sub>f</sub> ) [8]         |
| H <sub>2</sub> O   | -22.5 (T)                        | -49.21 (T) [6]                        |
|                    |                                  | -18.33 (T) [1]                        |
|                    |                                  | -26 (T) [7]                           |
|                    |                                  | -45.35 (T) [8]                        |
| H                  | -361.7 (T <sub>f</sub> )         | -295.25 (T <sub>f</sub> ) [6]         |
|                    |                                  | -255.69 (T <sub>f</sub> ) [1]         |
|                    |                                  | -284.63 (T <sub>f</sub> ) [3]         |
|                    |                                  | -267.26 (T <sub>f</sub> ) [8]         |
| O                  | -692.4 (T <sub>f</sub> )         | -466.02 (T <sub>f</sub> ) [6]         |
|                    |                                  | -511.37 (T <sub>f</sub> ) [1]         |
|                    |                                  | -489.18 (T <sub>f</sub> ) [2]         |
|                    |                                  | -507.51 (T <sub>f</sub> ) [7]         |
| H <sub>2</sub>     | 38.8 (above B)                   | -464.09 (T <sub>f</sub> ) [8]         |
|                    |                                  | -69.47 (T <sub>f</sub> ) [6]          |
|                    |                                  | -16.40 (T) [1]                        |

Table S 7. References in adsorption energy on Ni(211).

| Adsorbate          | Ni(211)                                               |                                             |
|--------------------|-------------------------------------------------------|---------------------------------------------|
|                    | $E_{\text{ads}}$                                      | Reference                                   |
| CO <sub>2</sub>    | -39.1 (B <sub>1</sub> T <sub>1</sub> T <sub>1</sub> ) | -40.52 (B <sub>1</sub> ) [5]                |
|                    |                                                       | -29.91 (TT) [8]                             |
| CO                 | -186.7 (T <sub>h</sub> <sup>2</sup> )                 | -190 (T <sub>h</sub> <sup>2</sup> ) [10]    |
|                    |                                                       | -201.65 (T <sub>h</sub> <sup>1</sup> ) [8]  |
| C                  | -874.1(F)                                             | -719.78 (T <sub>h</sub> <sup>2</sup> ) [5]  |
|                    |                                                       | -759.34 (F) [10]                            |
|                    |                                                       | 718.82 (F) [8]                              |
| CH                 | -634.2 (F)                                            | -589.53 (F) [5]                             |
|                    |                                                       | -650.31 (F) [10]                            |
|                    |                                                       | -677.33 (F) [8]                             |
| CH <sub>2</sub>    | -467.8 (T <sub>h</sub> <sup>2</sup> )                 | -389.8 (B <sub>1</sub> ) [5]                |
|                    |                                                       | -398.48 (T <sub>h</sub> <sup>2</sup> ) [10] |
| CH <sub>3</sub>    | -265.6 (T <sub>h</sub> <sup>2</sup> )                 | -176.57 (B <sub>1</sub> ) [5]               |
|                    |                                                       | -212.27 (B <sub>1</sub> ) [10]              |
| HCOO               | -340.6 (T <sub>1</sub> T <sub>1</sub> )               | -329.01 (TT) [8]                            |
| HCO                | -248.2 (T <sub>f</sub> <sup>1</sup> B <sub>1</sub> )  | -241.21 (B <sub>1</sub> ) [10]              |
|                    |                                                       | -243.14 (F) [8]                             |
| H <sub>2</sub> CO  | -90.3 (T <sub>2-3</sub> B <sub>1</sub> )              | -109.03 (B <sub>1</sub> ) [10]              |
| H <sub>3</sub> CO  | -269.1(B <sub>1</sub> )                               | -279.81 (B <sub>1</sub> ) [10]              |
| COOH               | -257.0 (B <sub>1</sub> T <sub>1</sub> )               | -244.11 (TT) [8]                            |
| COH                | -415.6 (F)                                            | -426.47 (T <sub>h</sub> <sup>2</sup> ) [10] |
|                    |                                                       | -419.71 (T <sub>h</sub> <sup>2</sup> ) [8]  |
|                    |                                                       | -411.03 (B <sub>1</sub> ) [10]              |
| HCOH               | -314.4 (B <sub>1</sub> OH down)                       | -411.03 (B <sub>1</sub> ) [10]              |
| H <sub>2</sub> COH | -192.6 (B <sub>1</sub> )                              | -203.58 (B <sub>1</sub> ) [10]              |
| H <sub>3</sub> COH | -44.3 (T <sub>1</sub> )                               | -60.79 (T <sub>1</sub> ) [10]               |
| OH                 | -415.0 (B <sub>1</sub> H over lower edge)             | -372.43 (B <sub>1</sub> ) [10]              |
|                    |                                                       | -334.80 (B <sub>1</sub> ) [8]               |
| H <sub>2</sub> O   | -48.5 (T <sub>1</sub> H's over lower edge)            | -50.17 (T <sub>1</sub> ) [10]               |
|                    |                                                       | -69.47 (T <sub>1</sub> ) [8]                |
| H                  | -359.2 (T <sub>f</sub> <sup>2</sup> )                 | -259.55 (T <sub>h</sub> <sup>2</sup> ) [5]  |
|                    |                                                       | -258.58 (T <sub>h</sub> <sup>2</sup> ) [10] |
|                    |                                                       | -263.40 (T <sub>h</sub> <sup>2</sup> ) [8]  |
| O                  | -711.4 (T <sub>h</sub> <sup>2</sup> )                 | -565.40 (T <sub>h</sub> <sup>2</sup> ) [10] |
|                    |                                                       | -464.09 (T <sub>h</sub> <sup>2</sup> ) [8]  |
| H <sub>2</sub>     | -11.4 (horizontal above T <sub>1</sub> )              | -17.37 (T <sub>1</sub> ) [10]               |



## C. References Adsorption Energies

### References

- (1) Mohsenzadeh, A.; Richards, T.; Bolton, K. DFT Study of the Water Gas Shift Reaction on Ni(111), Ni(100) and Ni(110) Surfaces. *Surf. Sci.* **2016**, *644*, 53–63. <https://doi.org/10.1016/j.susc.2015.09.014>.
- (2) Wang, S.; Cao, D.; Li, Y.; Wang, J.; Jiao, H. Chemisorption of CO<sub>2</sub> on Nickel Surfaces. *J. Phys. Chem. B* **2005**, *109*, 18956–18963.
- (3) Zhou, Y. H.; Lv, P. H.; Wang, G. C. DFT Studies of Methanol Decomposition on Ni(1 0 0) Surface: Compared with Ni(1 1 1) Surface. *J. Mol. Catal. A Chem.* **2006**, *258* (1–2), 203–215. <https://doi.org/10.1016/j.molcata.2006.04.013>.
- (4) Kresse, G.; Hafner, J. Ab Initio Molecular-Dynamics Simulation of the Liquid-Metal–Amorphous-Semiconductor Transition in Germanium. *Phys. Rev. B* **1994**, *49* (20), 14251–14269. <https://doi.org/10.1103/PhysRevB.49.14251>.
- (5) Yang, K.; Zhang, M.; Yu, Y. Methane Formation from Successive Hydrogenation of C over Stepped Ni and Ni<sub>3</sub>Fe Surfaces: Effect of Surface Composition. *Int. J. Hydrogen Energy* **2017**, *42* (2), 914–927. <https://doi.org/10.1016/j.ijhydene.2016.09.172>.
- (6) Ren, J.; Guo, H.; Yang, J.; Qin, Z.; Lin, J.; Li, Z. Insights into the Mechanisms of CO<sub>2</sub> Methanation on Ni(111) Surfaces by Density Functional Theory. *Appl. Surf. Sci.* **2015**, *351*, 504–516. <https://doi.org/10.1016/j.apsusc.2015.05.173>.
- (7) Zhang, M.; Zijlstra, B.; Filot, I. A. W.; Li, F.; Wang, H.; Li, J.; Hensen, E. J. M. A Theoretical Study of the Reverse Water-Gas Shift Reaction on Ni(111) and Ni(311) Surfaces. *Can. J. Chem. Eng.* **2019**, No. August, 1–9. <https://doi.org/10.1002/cjce.23655>.
- (8) Catapan, R. C.; Oliveira, A. A. M.; Chen, Y.; Vlachos, D. G. DFT Study of the Water-Gas Shift Reaction and Coke Formation on Ni(111) and Ni(211) Surfaces. *J. Phys. Chem. C* **2012**, *116* (38), 20281–20291. <https://doi.org/10.1021/jp302488f>.
- (9) Wang, G. C.; Zhou, Y. H.; Morikawa, Y.; Nakamura, J.; Cai, Z. S.; Zhao, X. Z. Kinetic Mechanism of Methanol Decomposition on Ni(111) Surface: A Theoretical Study. *J. Phys. Chem. B* **2005**, *109* (25), 12431–12442. <https://doi.org/10.1021/jp0463969>.
- (10) Zhi, C.; Zhang, R.; Wang, B. Comparative Studies about CO Methanation over Ni(211) and Zr-Modified Ni(211) Surfaces: Qualitative Insight into the Effect of Surface Structure and Composition. *Mol. Catal.* **2017**, *438*, 1–14. <https://doi.org/10.1016/j.mcat.2017.05.012>.

## D Stable Geometries of Reaction Intermediates

In Figure S 2 to Figure S 21 show top and side view of stable geometries on Ni(111), Ni(100), Ni(110) and Ni(211) calculated for each adsorbate of the carbide, formate, carboxylic pathway and water formation. The stable geometries are ordered from left to right in descending stability. Corresponding chemisorption energy (kJ/mol) and adsorption site are indicated above.

### Ni(111)

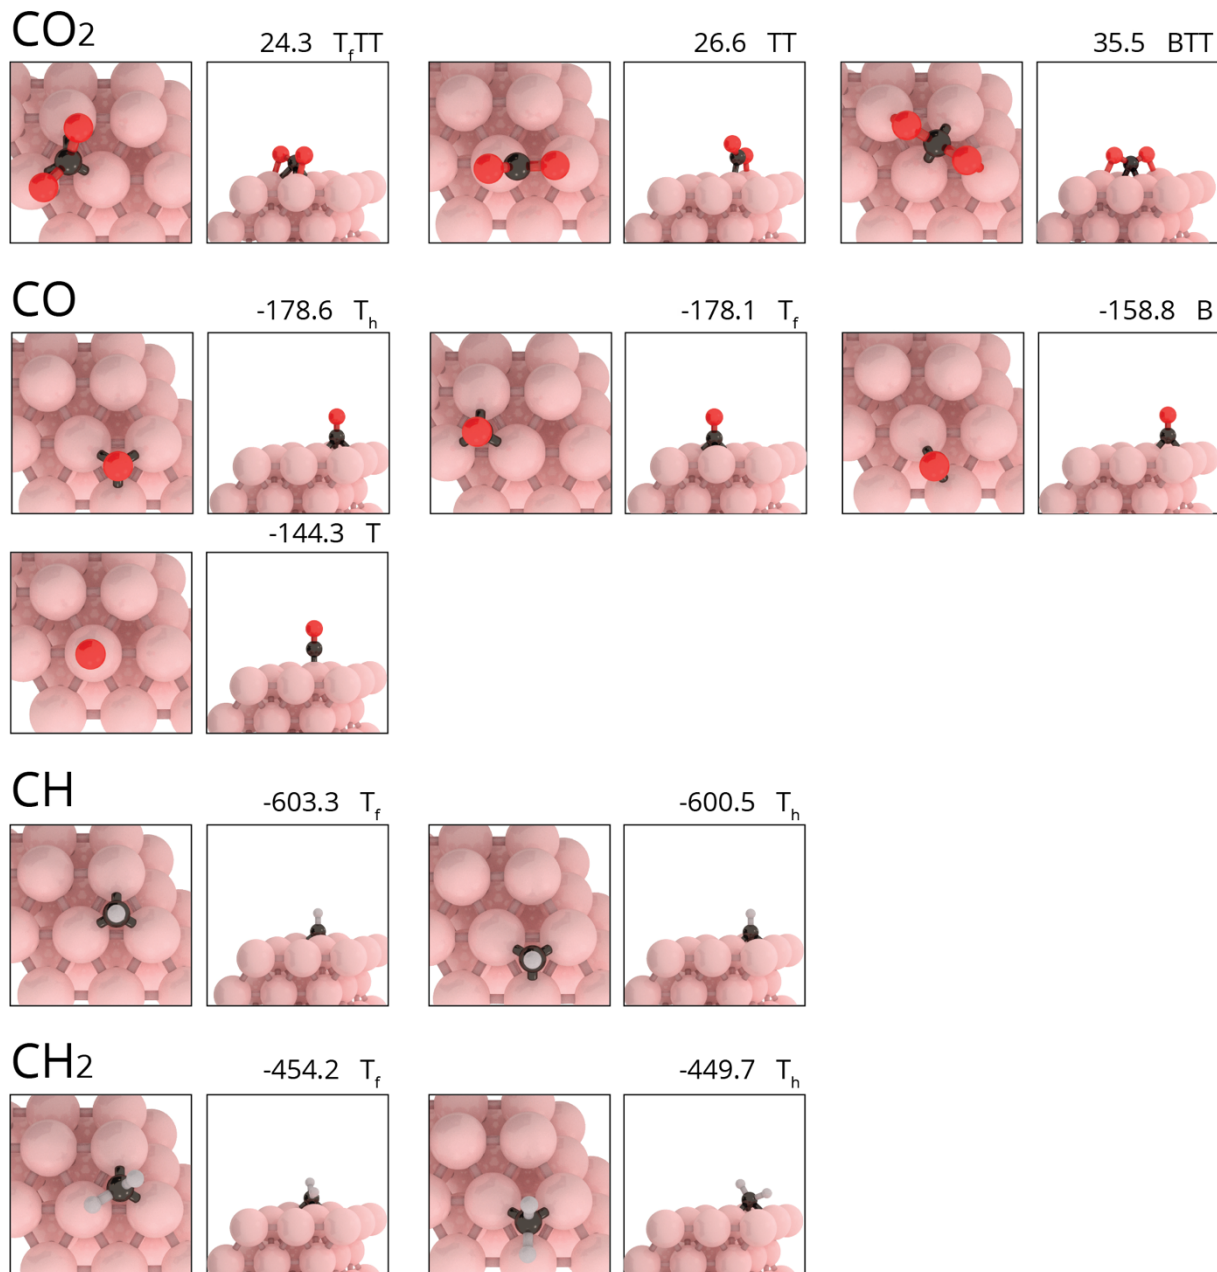

Figure S 1. Top and side view of stable geometries for CO<sub>2</sub>, CO, CH and CH<sub>2</sub> on Ni(111). Corresponding chemisorption energy (kJ/mol) and adsorption site is indicated above each picture frame.

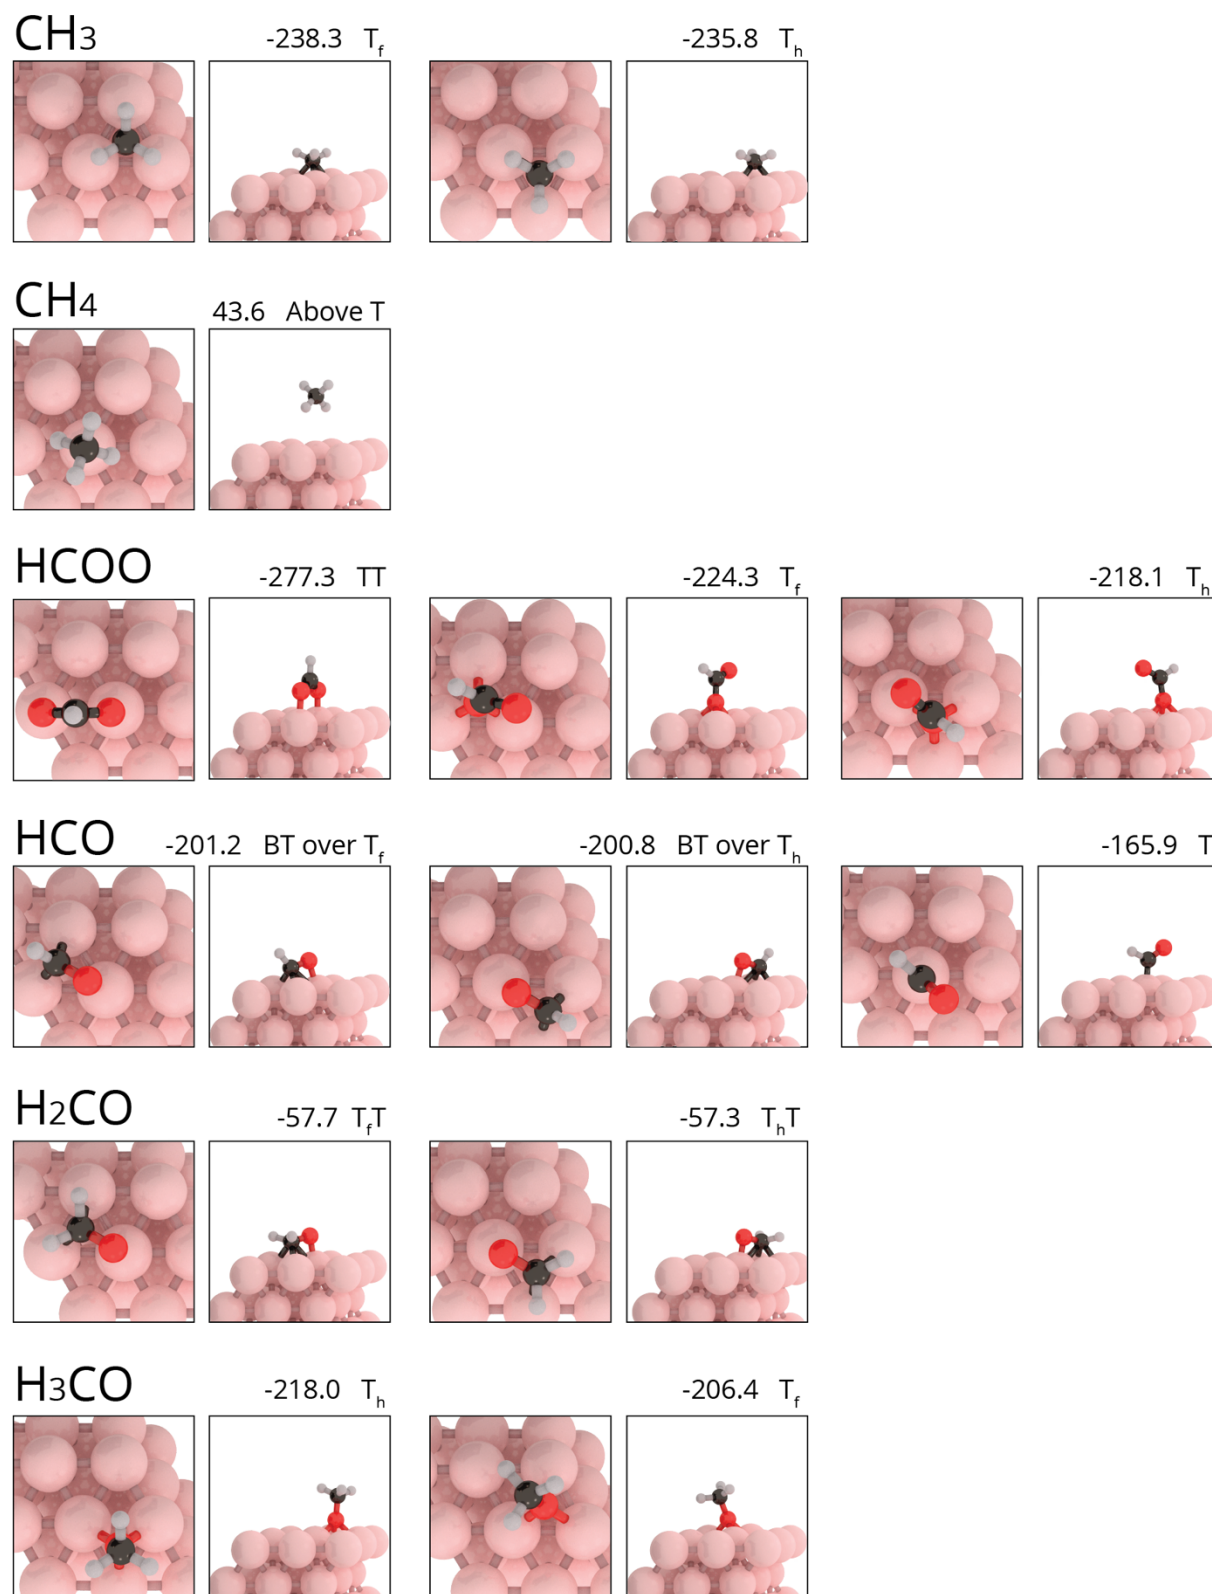

Figure S 2. Top and side view of stable geometries for CH<sub>3</sub>, CH<sub>4</sub>, HCOO, HCO, H<sub>2</sub>CO and H<sub>3</sub>CO on Ni(111). Corresponding chemisorption energy (kJ/mol) and adsorption site is indicated above each picture frame.

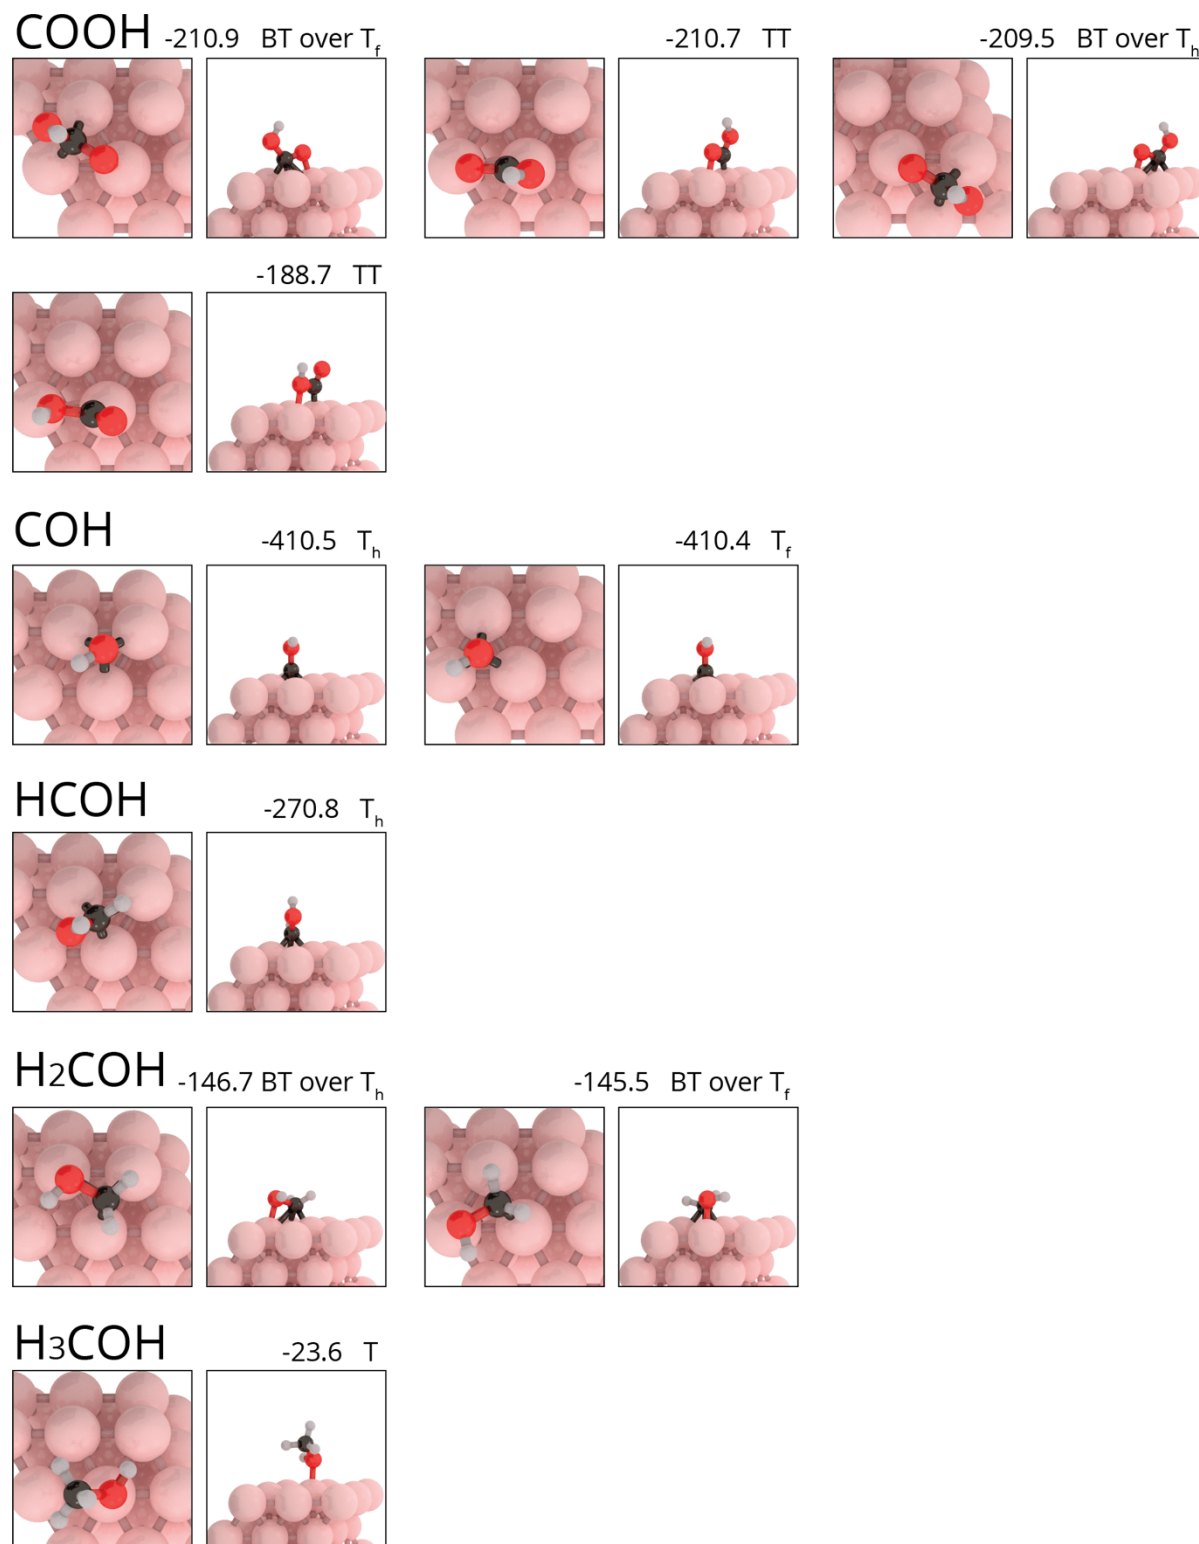

Figure S 3. Top and side view of stable geometries for COOH, COH, HCOH, H<sub>2</sub>COH and H<sub>3</sub>COH on Ni(111). Corresponding chemisorption energy (kJ/mol) and adsorption site is indicated above each picture frame.



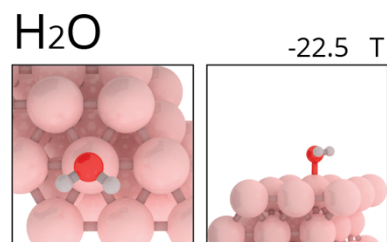

Figure S 5. Top and side view of stable geometry for H<sub>2</sub>O Ni(111). Corresponding chemisorption energy (kJ/mol) and adsorption site is indicated above each picture frame.

### Ni(100)

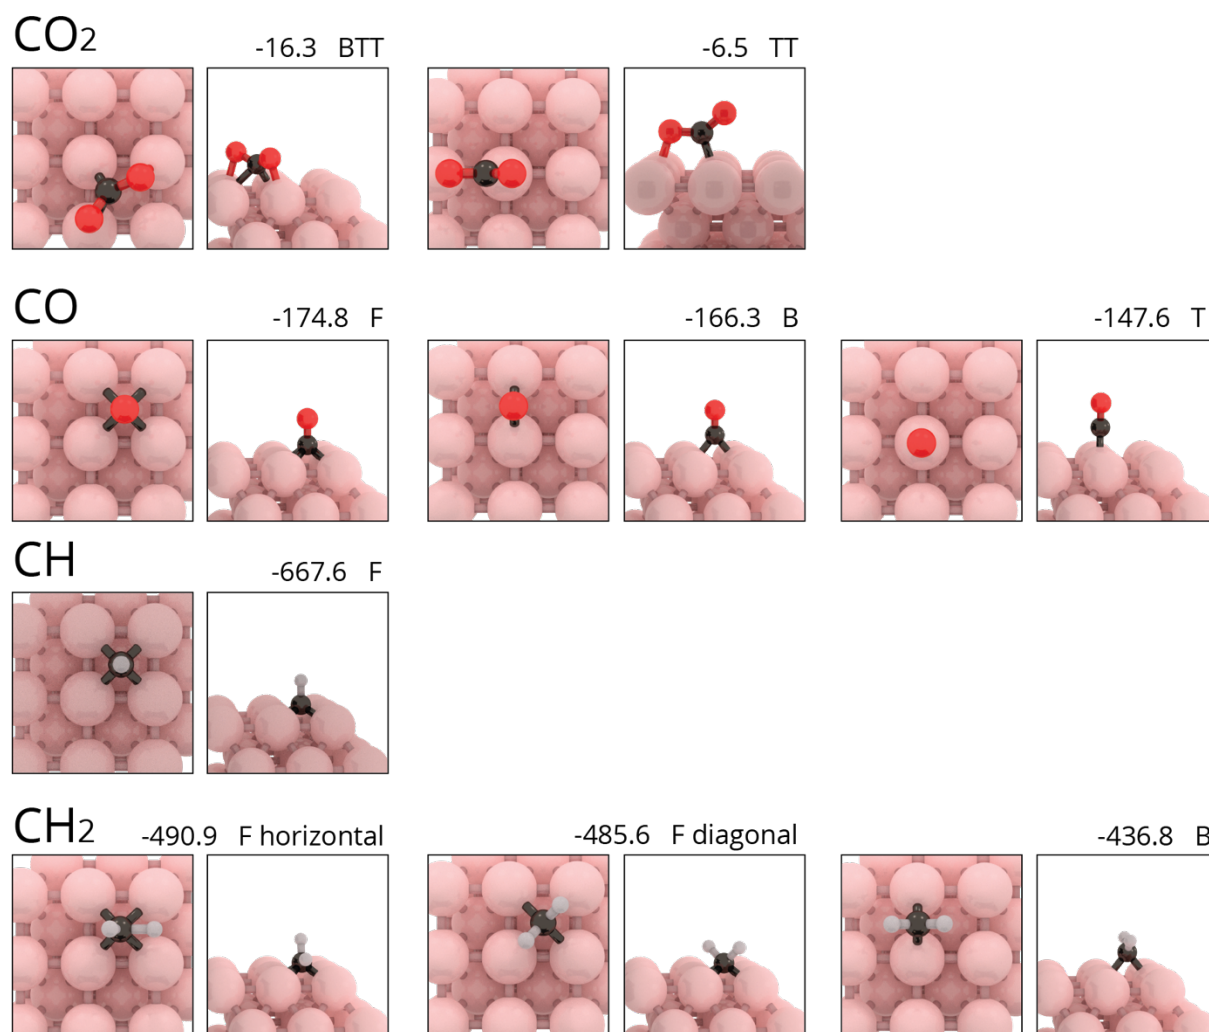

Figure S 6. Top and side view of stable geometries for CO<sub>2</sub>, CO, CH and CH<sub>2</sub> on Ni(100). Corresponding chemisorption energy (kJ/mol) and adsorption site is indicated above each picture frame.

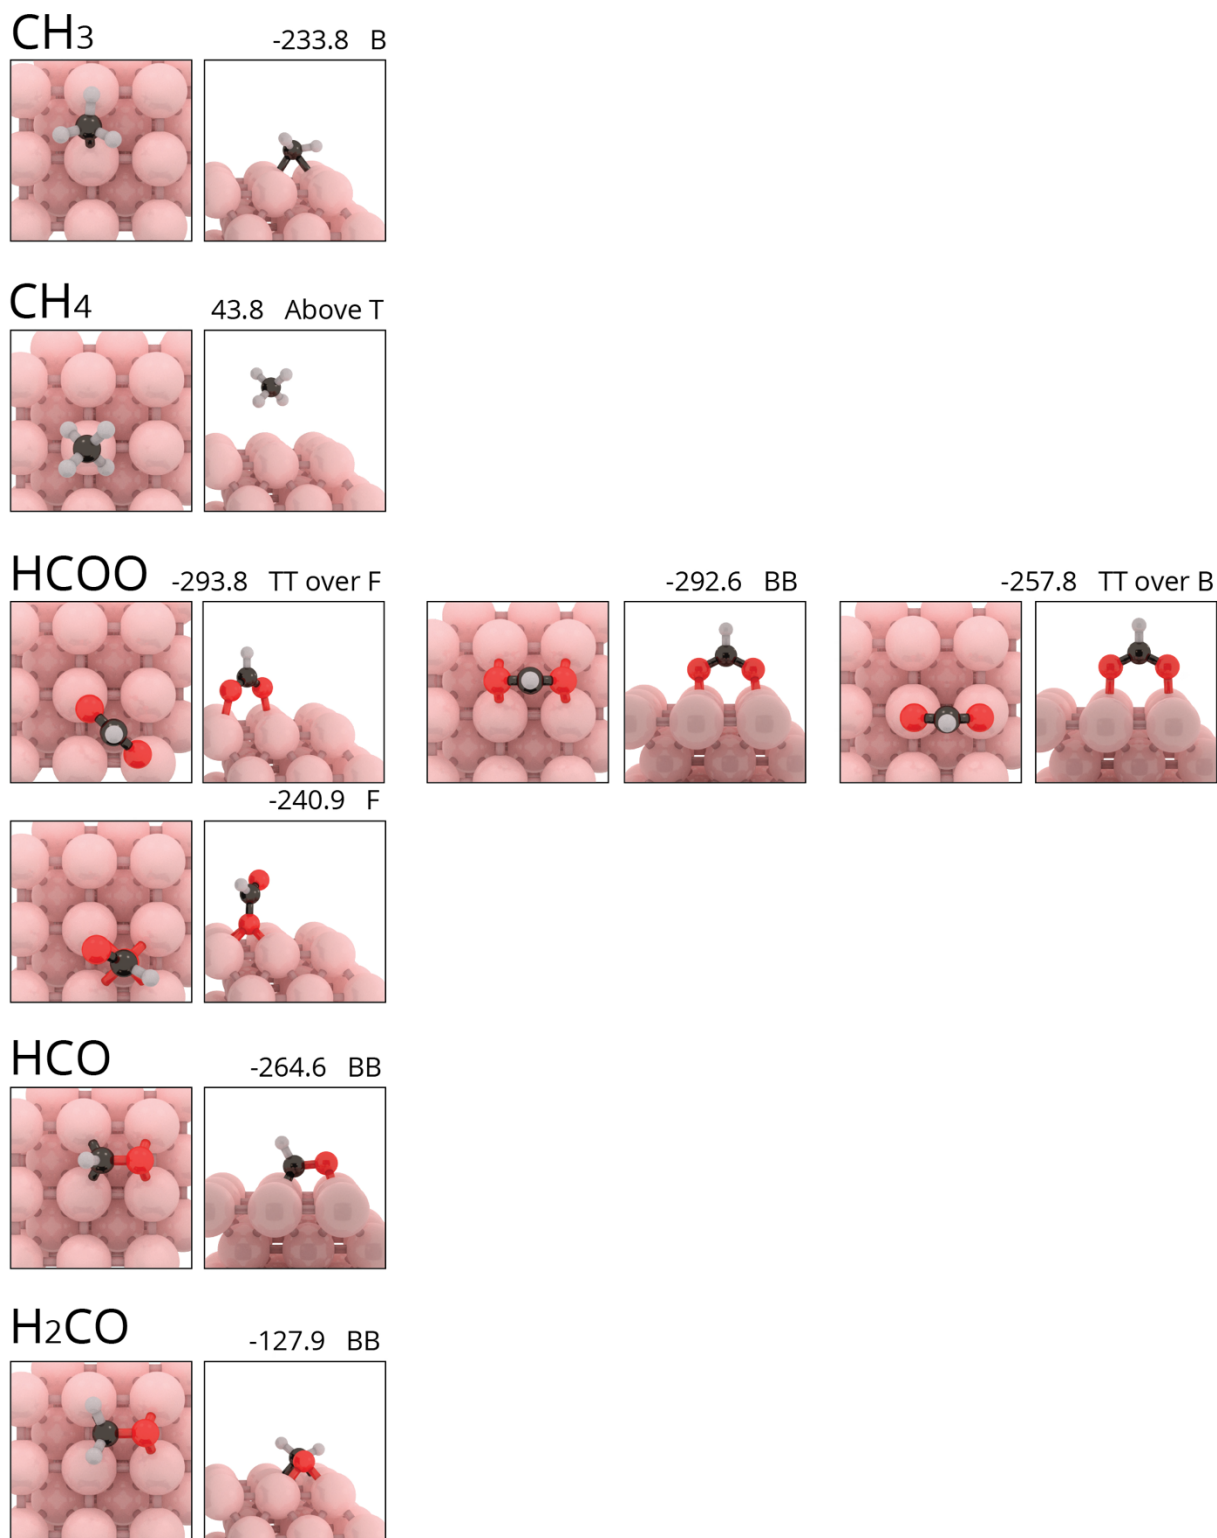

Figure S 7. Top and side view of stable geometries for CH<sub>3</sub>, CH<sub>4</sub>, HCOO, HCO and H<sub>2</sub>CO on Ni(100). Corresponding chemisorption energy (kJ/mol) and adsorption site is indicated above each picture frame.

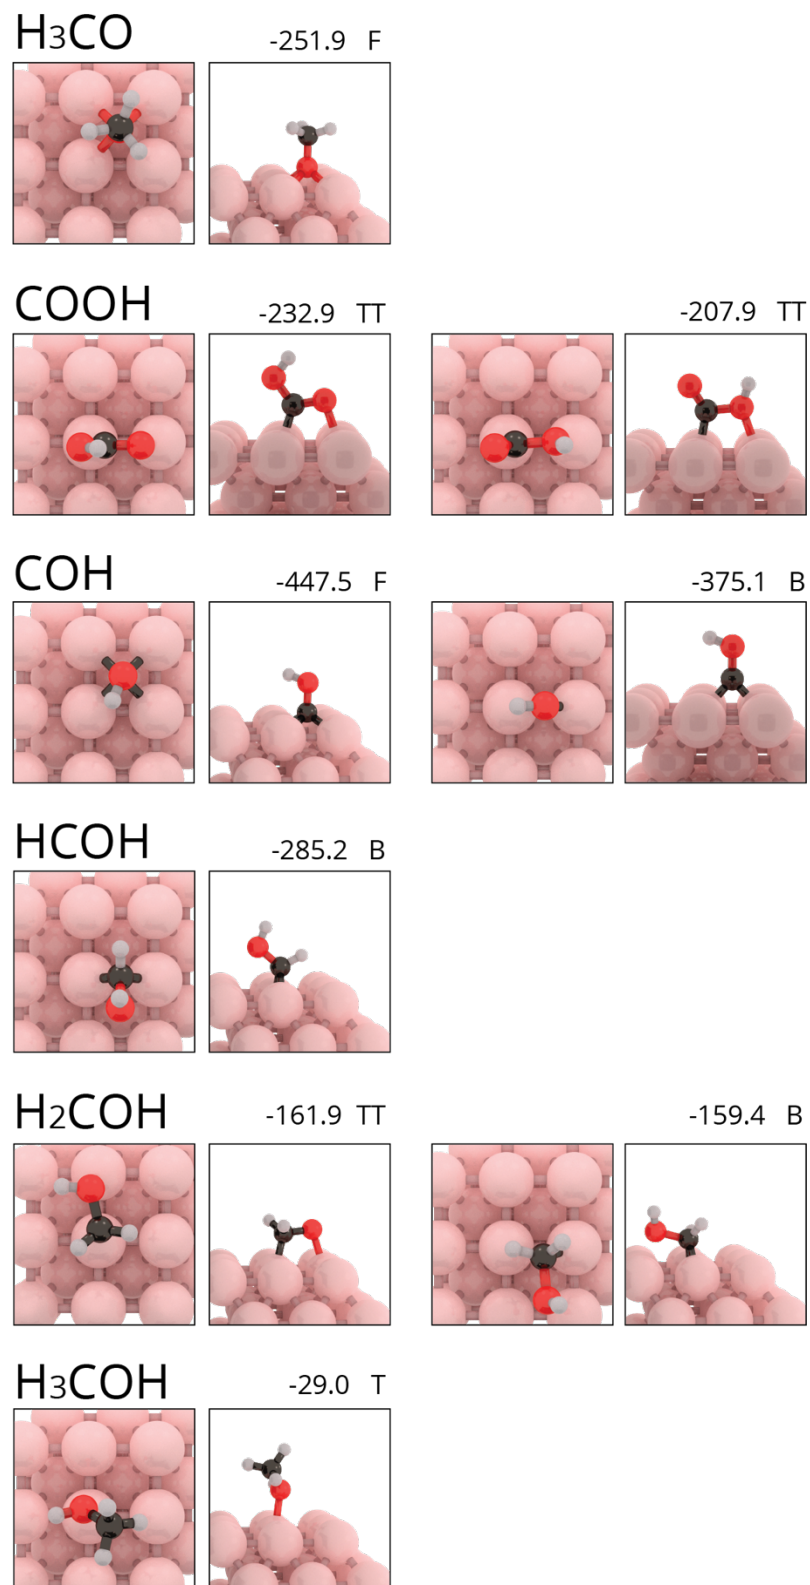

Figure S 8. Top and side view of stable geometries for H<sub>3</sub>CO, COOH, COH, HCOH, H<sub>2</sub>COH, and H<sub>3</sub>COH on Ni(100). Corresponding chemisorption energy (kJ/mol) and adsorption site is indicated above each picture frame.



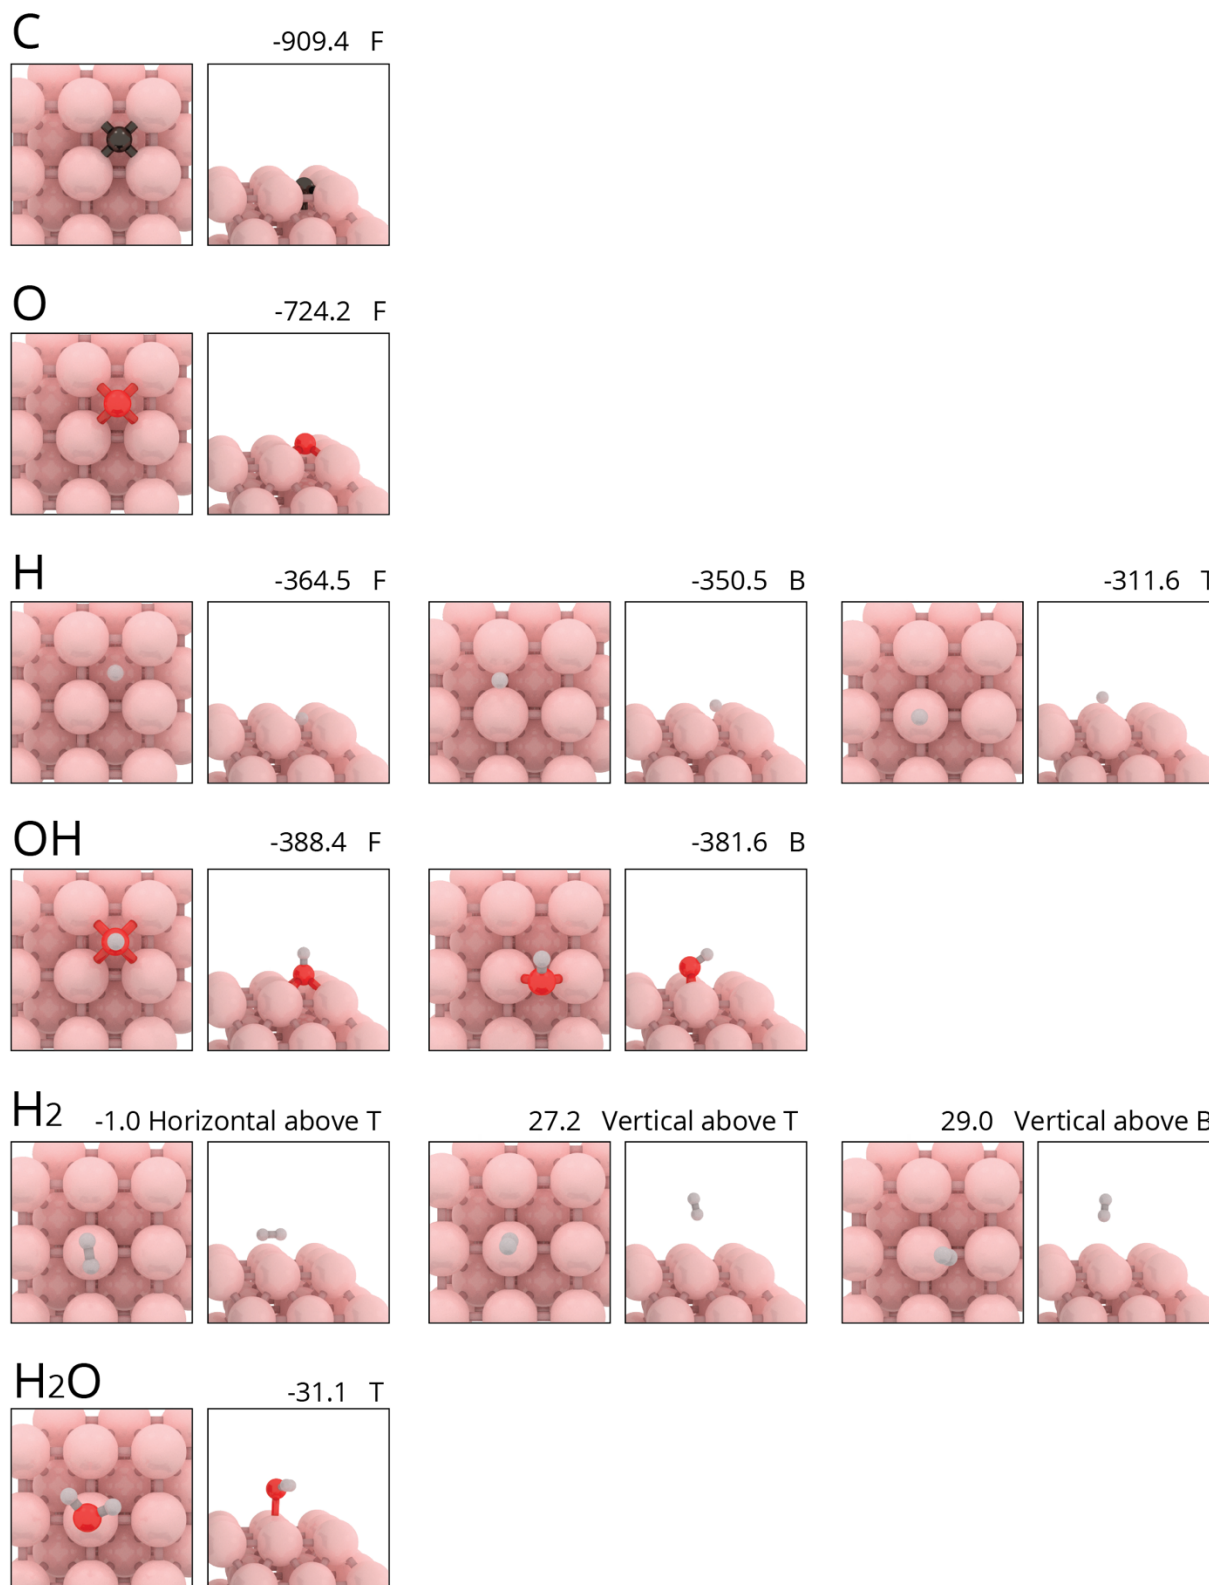

Figure S 9. Top and side view of stable geometries for C, O, H, OH, H<sub>2</sub> and H<sub>2</sub>O on Ni(100). Corresponding chemisorption energy (kJ/mol) and adsorption site is indicated above each picture frame.

**Ni(110)**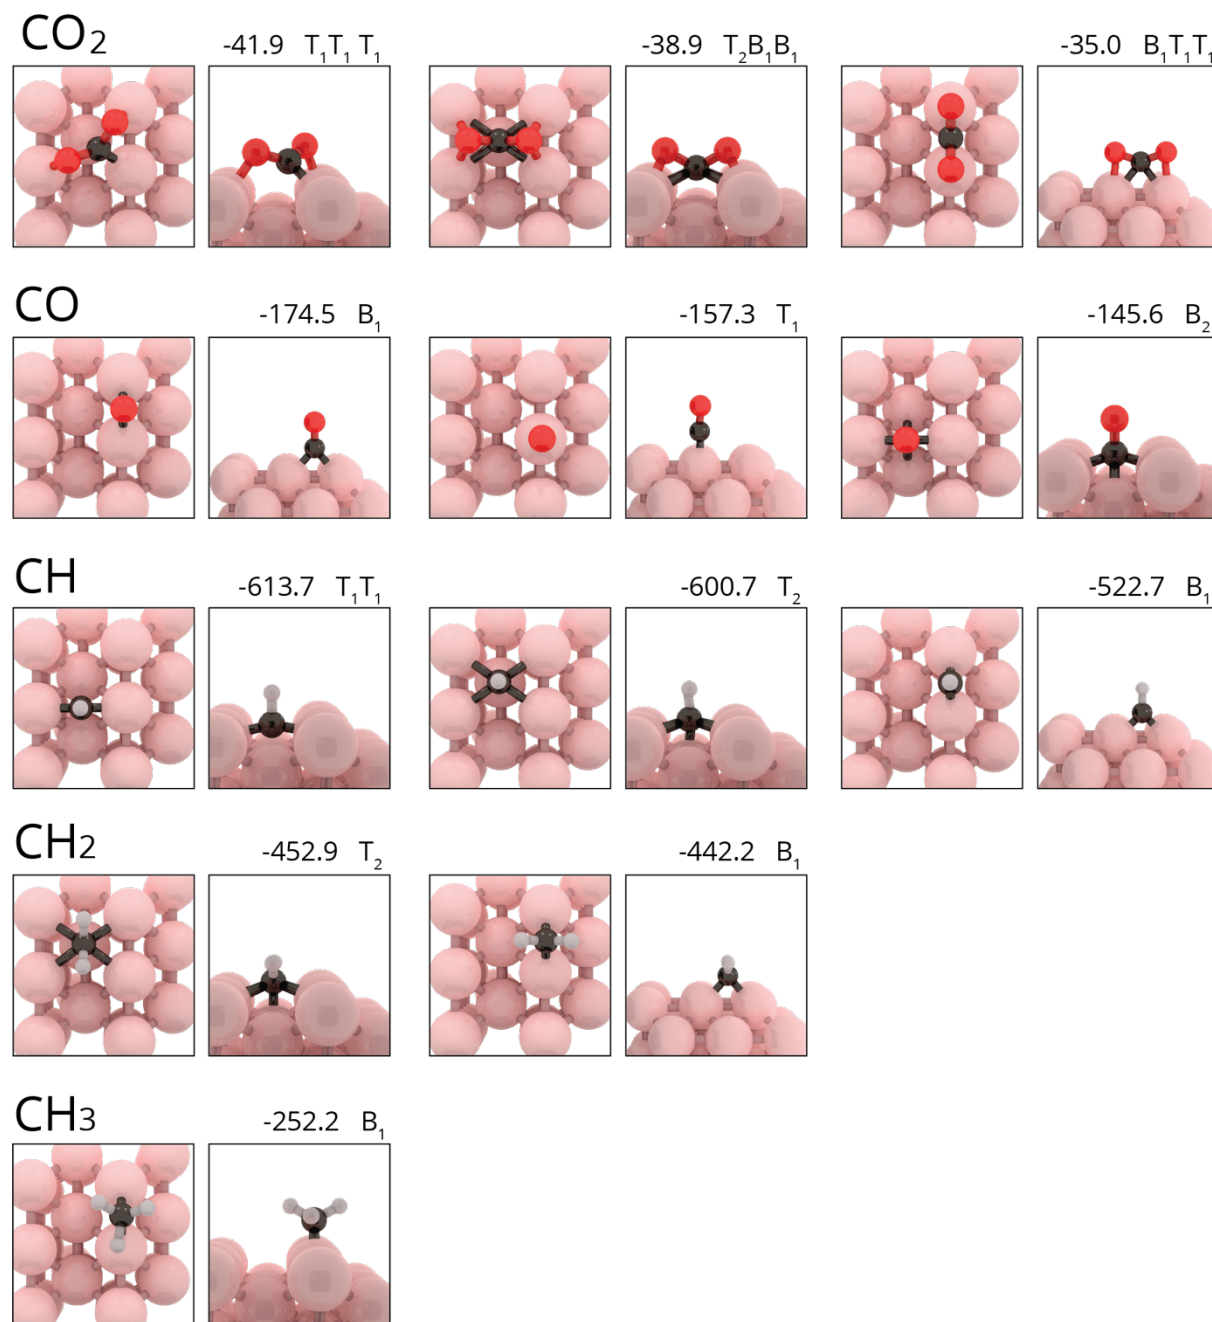

Figure S 10. Top and side view of stable geometries for CO<sub>2</sub>, CO, CH, CH<sub>2</sub> and CH<sub>3</sub> on Ni(110). Corresponding chemisorption energy (kJ/mol) and adsorption site is indicated above each picture frame.

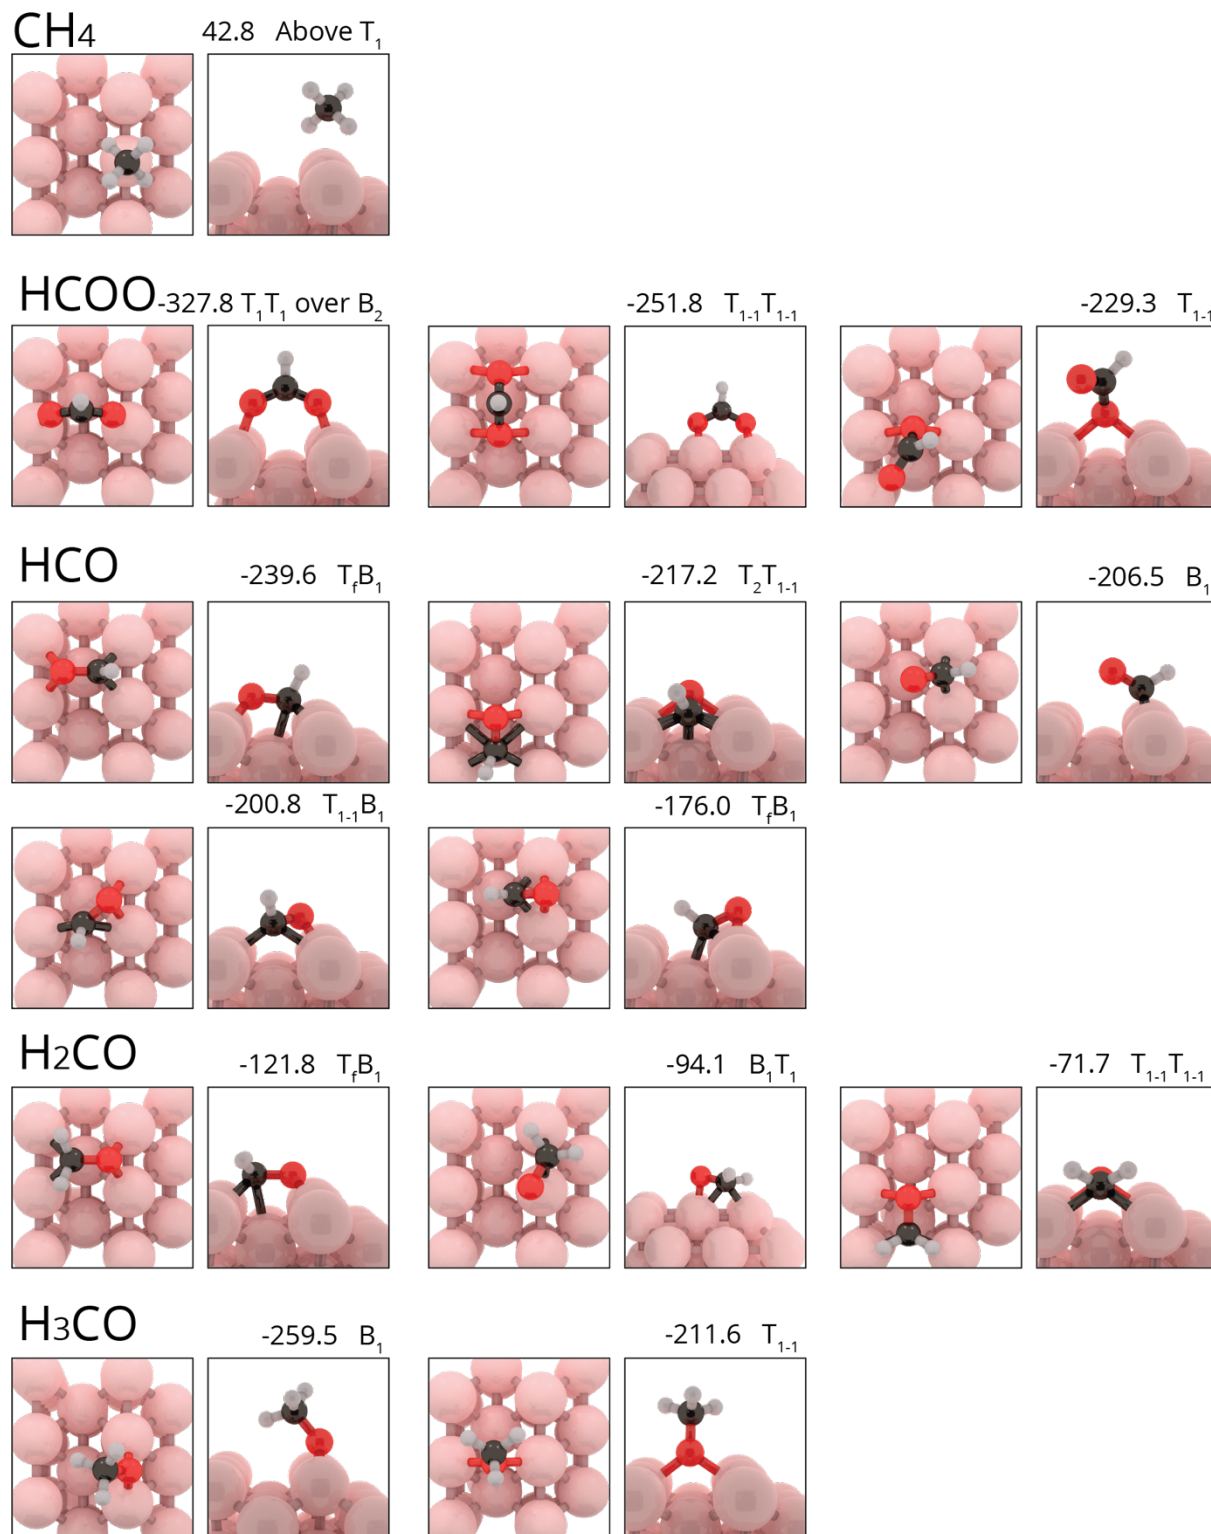

Figure S 11. Top and side view of stable geometries for CH<sub>4</sub>, HCOO, HCO, H<sub>2</sub>CO and H<sub>3</sub>CO on Ni(110). Corresponding chemisorption energy (kJ/mol) and adsorption site is indicated above each picture frame.

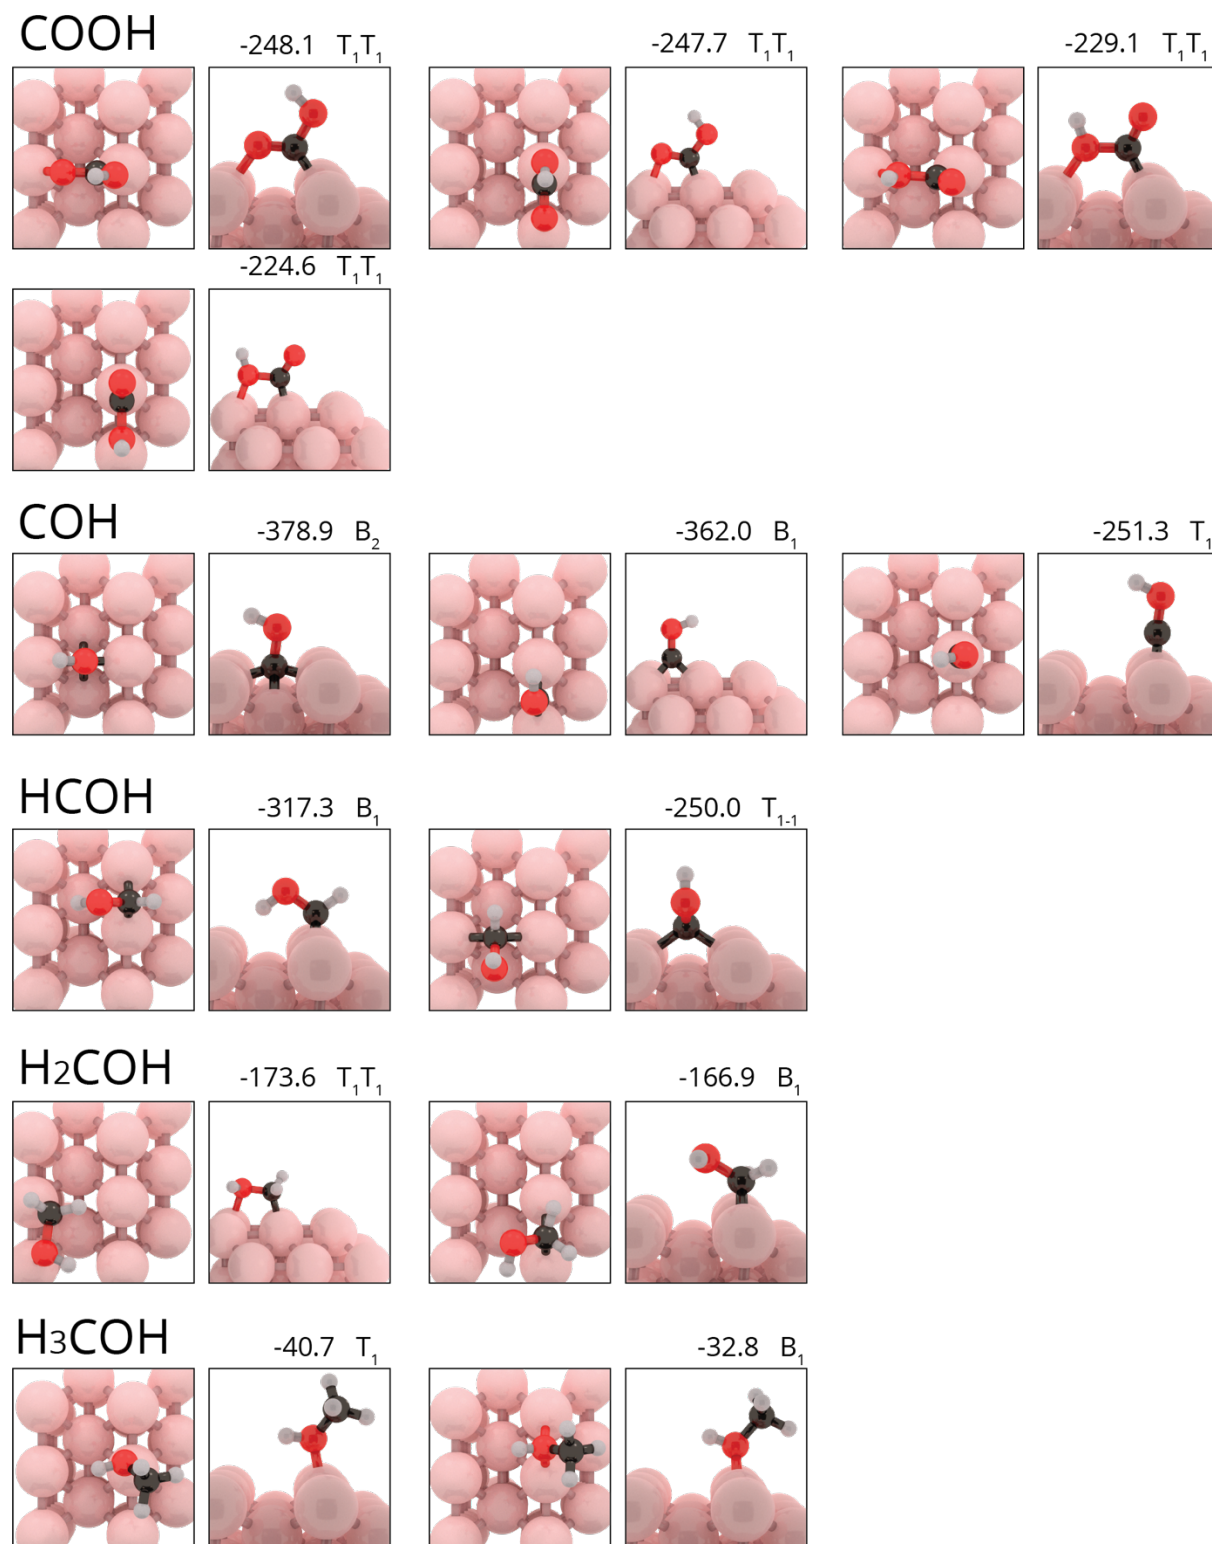

Figure S 12. Top and side view of stable geometries for COOH, COH, HCOH, H<sub>2</sub>COH and H<sub>3</sub>COH on Ni(110). Corresponding chemisorption energy (kJ/mol) and adsorption site is indicated above each picture frame.

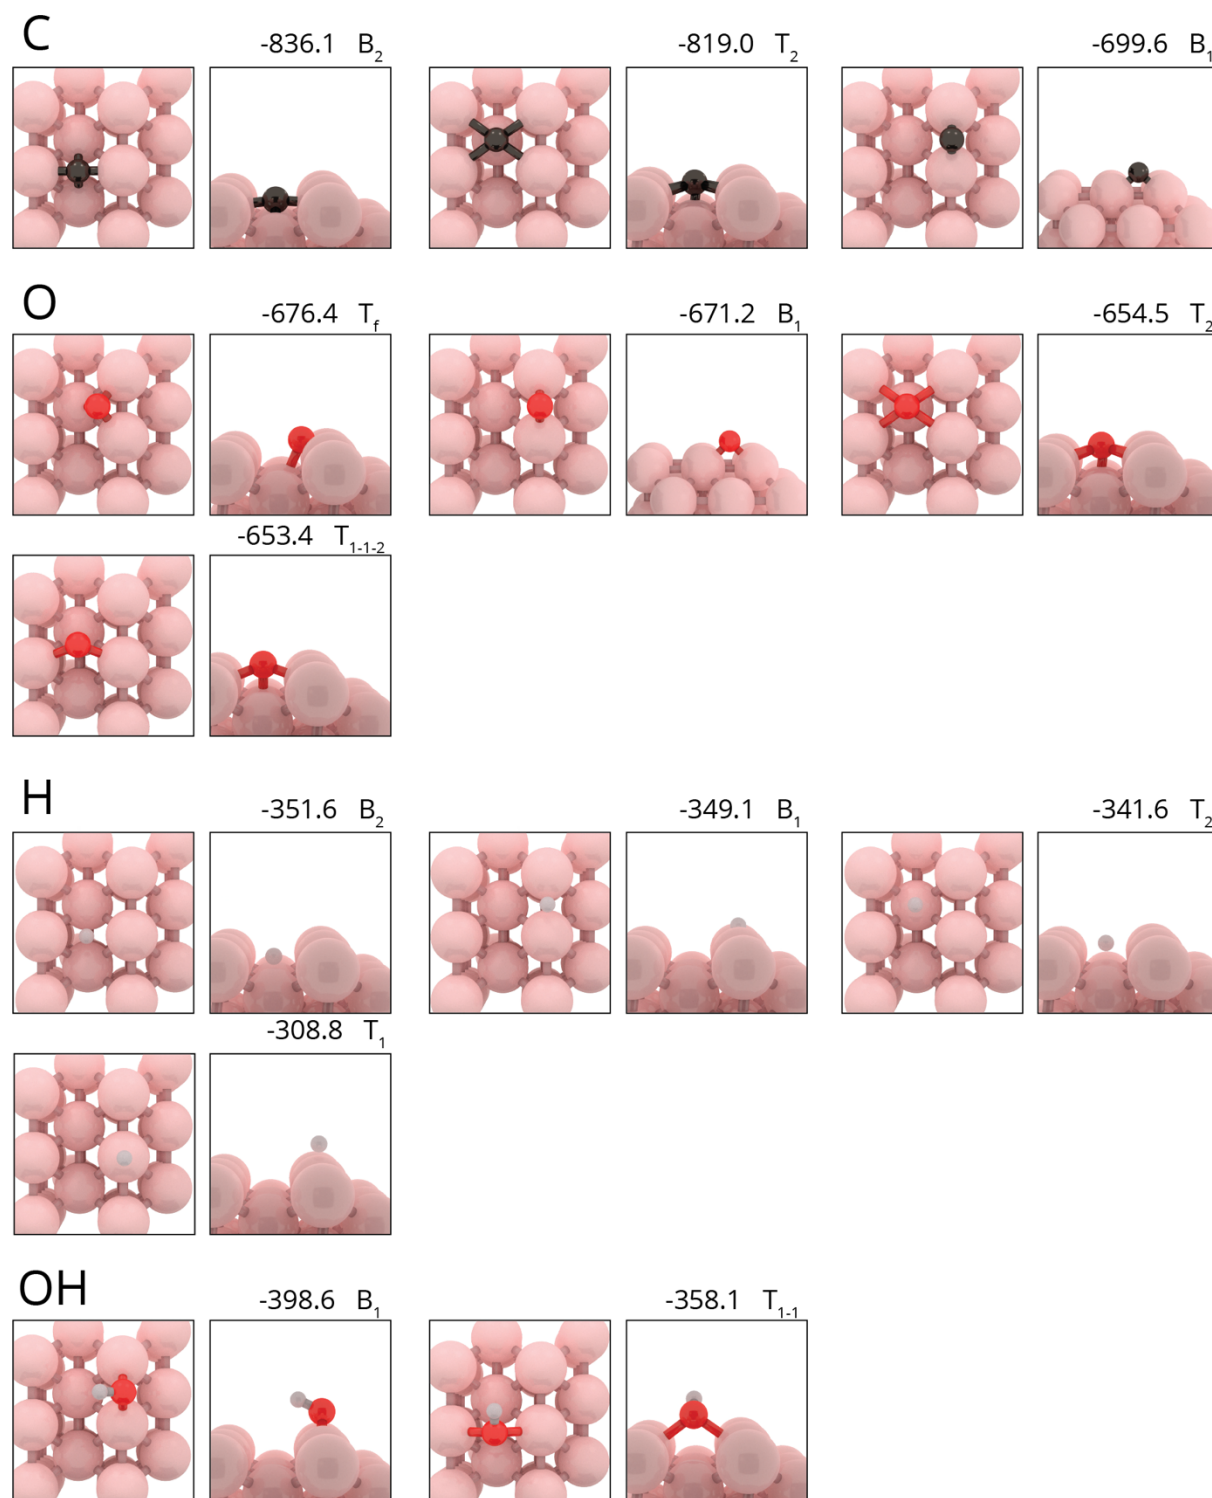

Figure S 13. Top and side view of stable geometries for C, O, H and OH on Ni(110). Corresponding chemisorption energy (kJ/mol) and adsorption site is indicated above each picture frame.

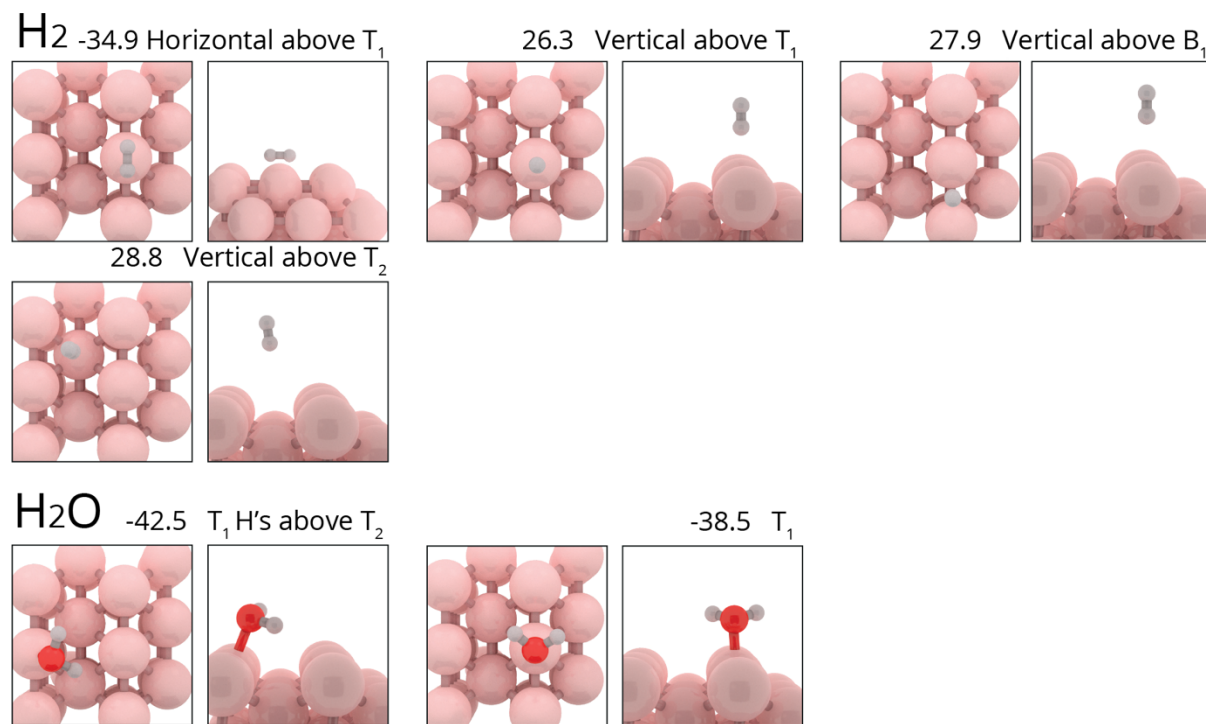

Figure S 14. Top and side view of stable geometries for H<sub>2</sub> and H<sub>2</sub>O on Ni(110). Corresponding chemisorption energy (kJ/mol) and adsorption site is indicated above each picture frame.

## Ni(211)

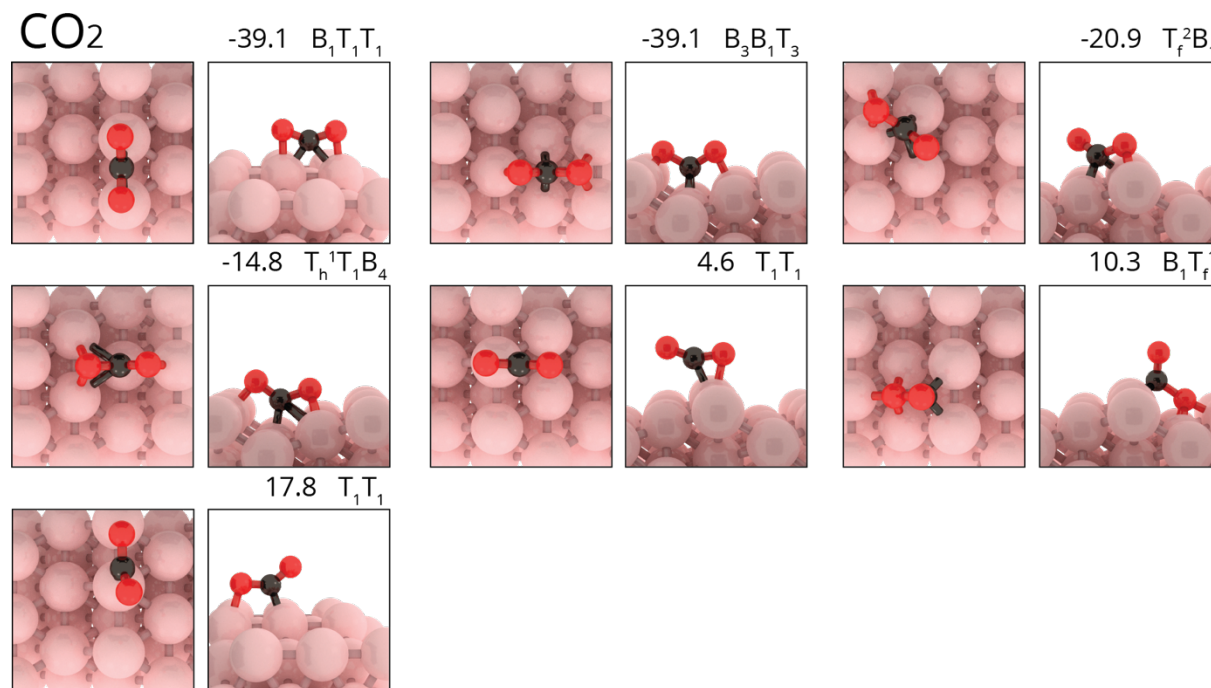

Figure S 15. Top and side view of stable geometries for CO<sub>2</sub> on Ni(211). Corresponding chemisorption energy (kJ/mol) and adsorption site is indicated above each picture frame.

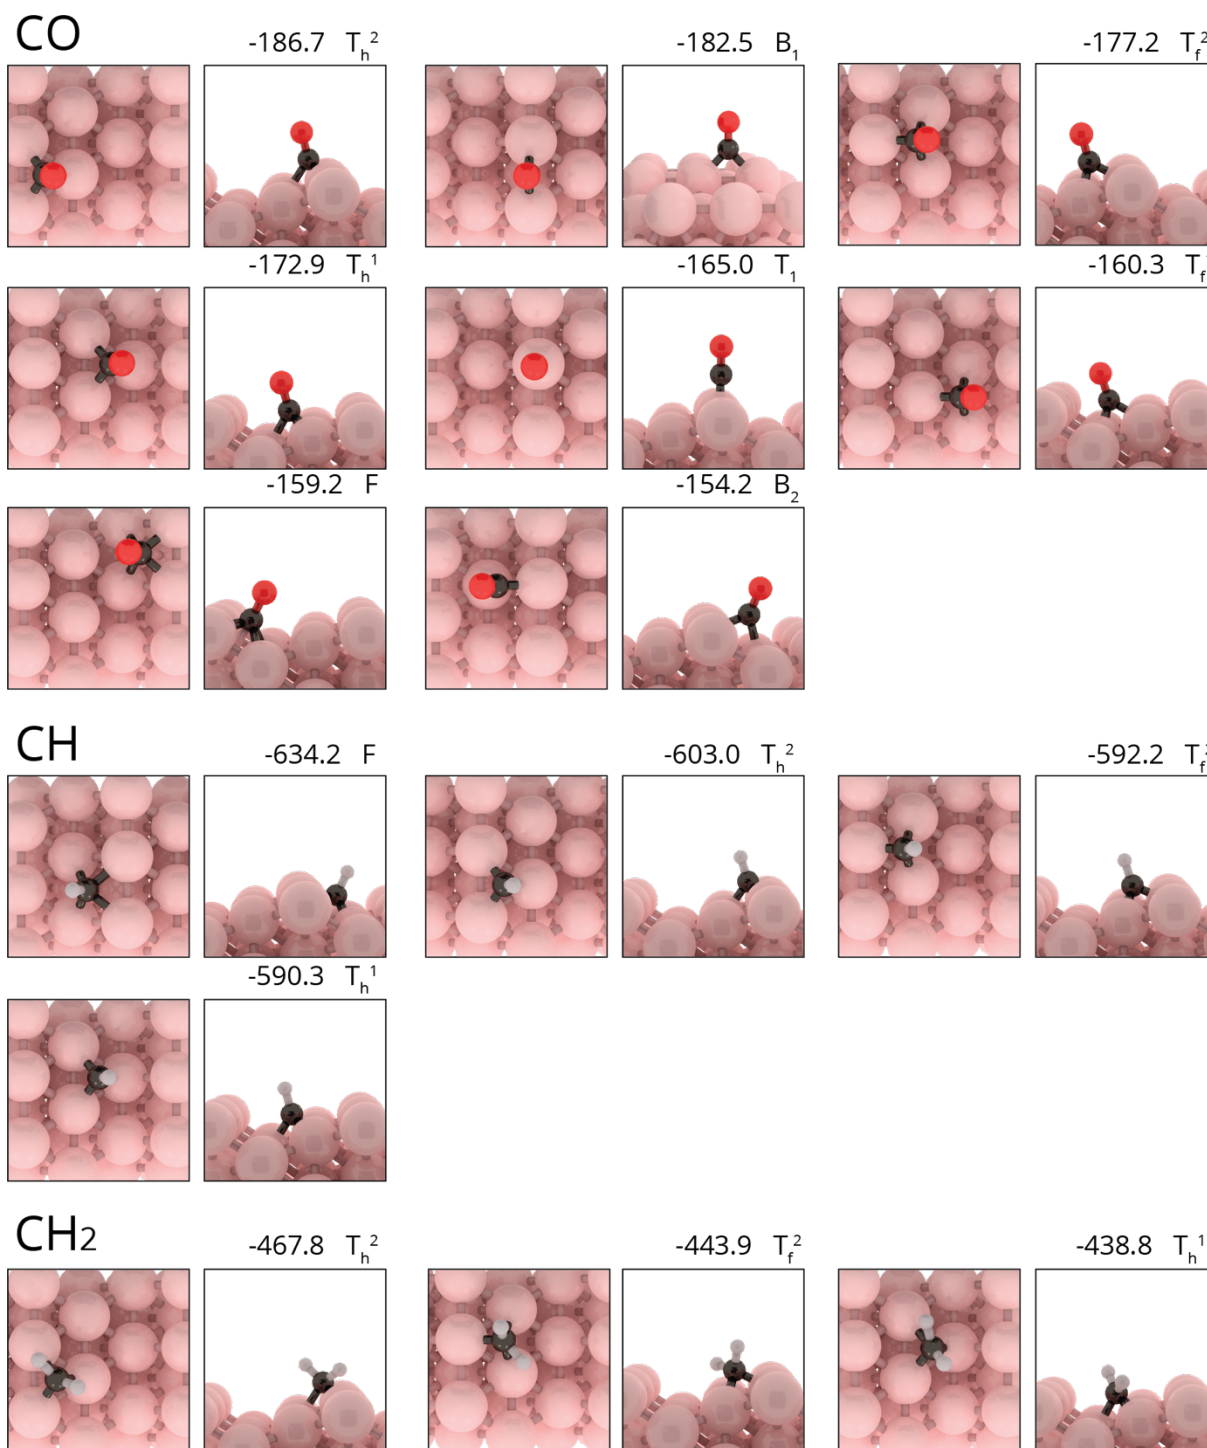

Figure S 16. Top and side view of stable geometries for CO, CH and CH<sub>2</sub> on Ni(211). Corresponding chemisorption energy (kJ/mol) and adsorption site is indicated above each picture frame.

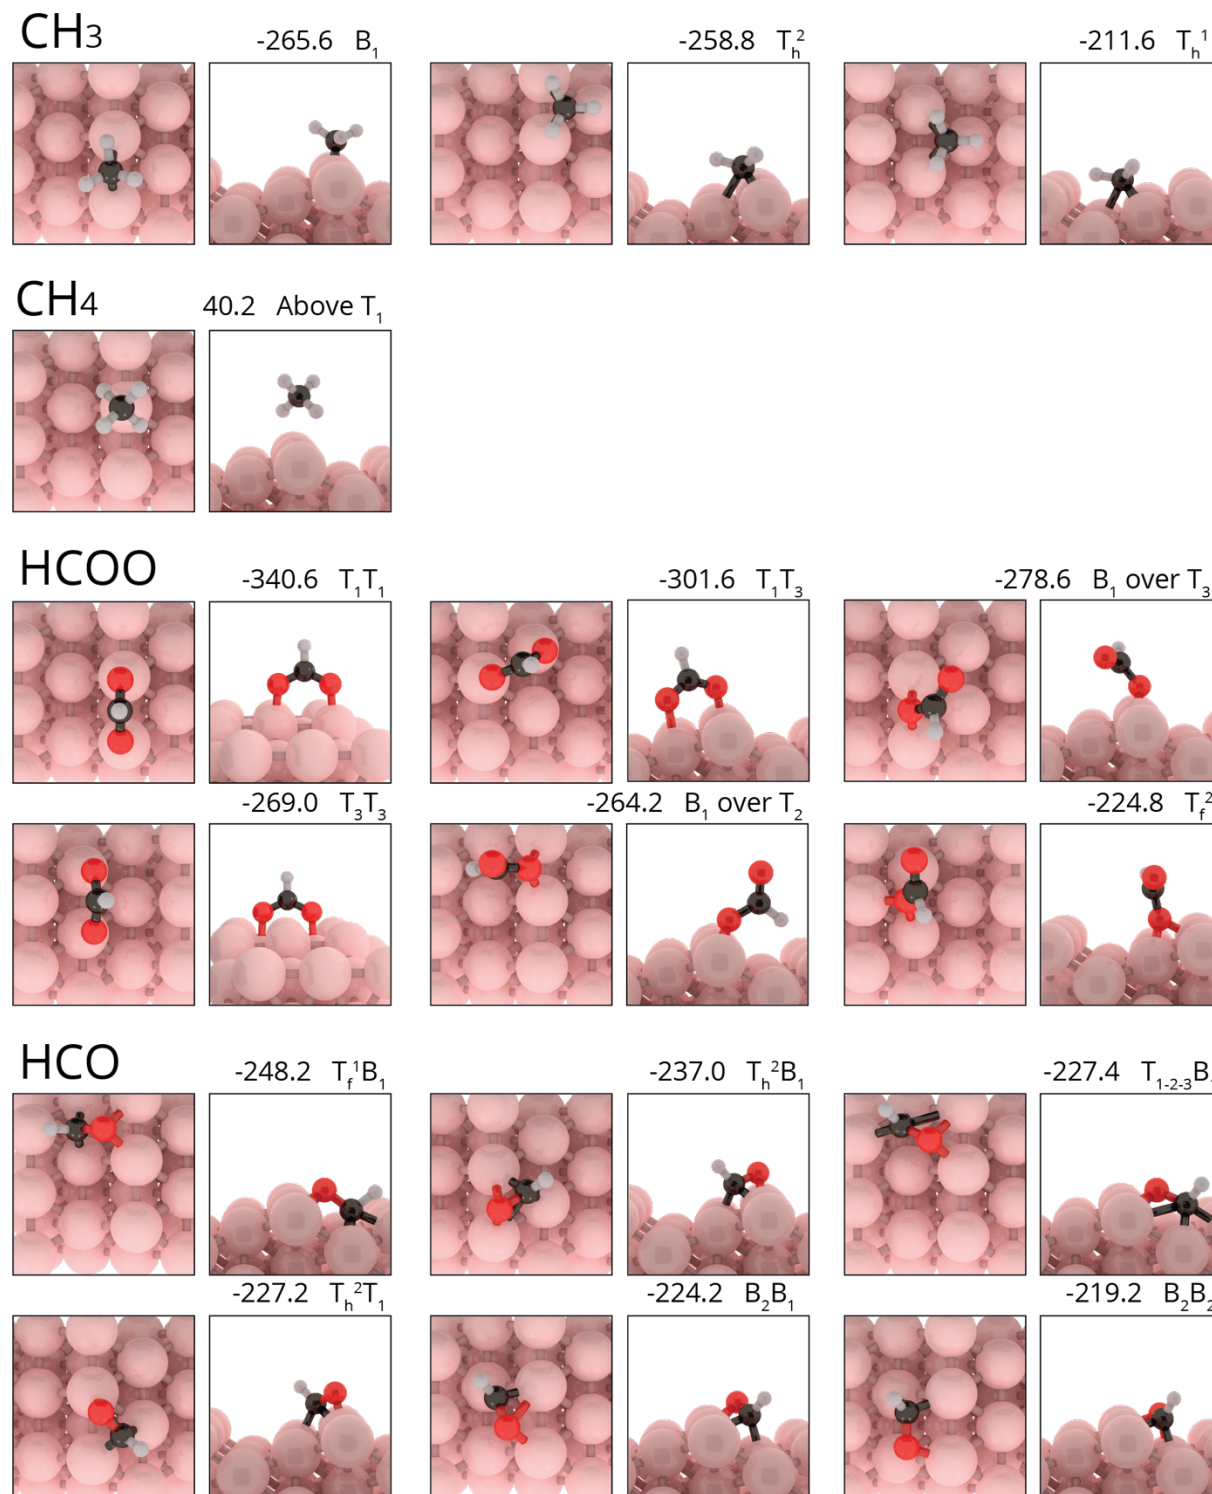

Figure S 17. Top and side view of stable geometries for CH<sub>3</sub>, CH<sub>4</sub>, HCOO and HCO on Ni(211). Corresponding chemisorption energy (kJ/mol) and adsorption site is indicated above each picture frame.



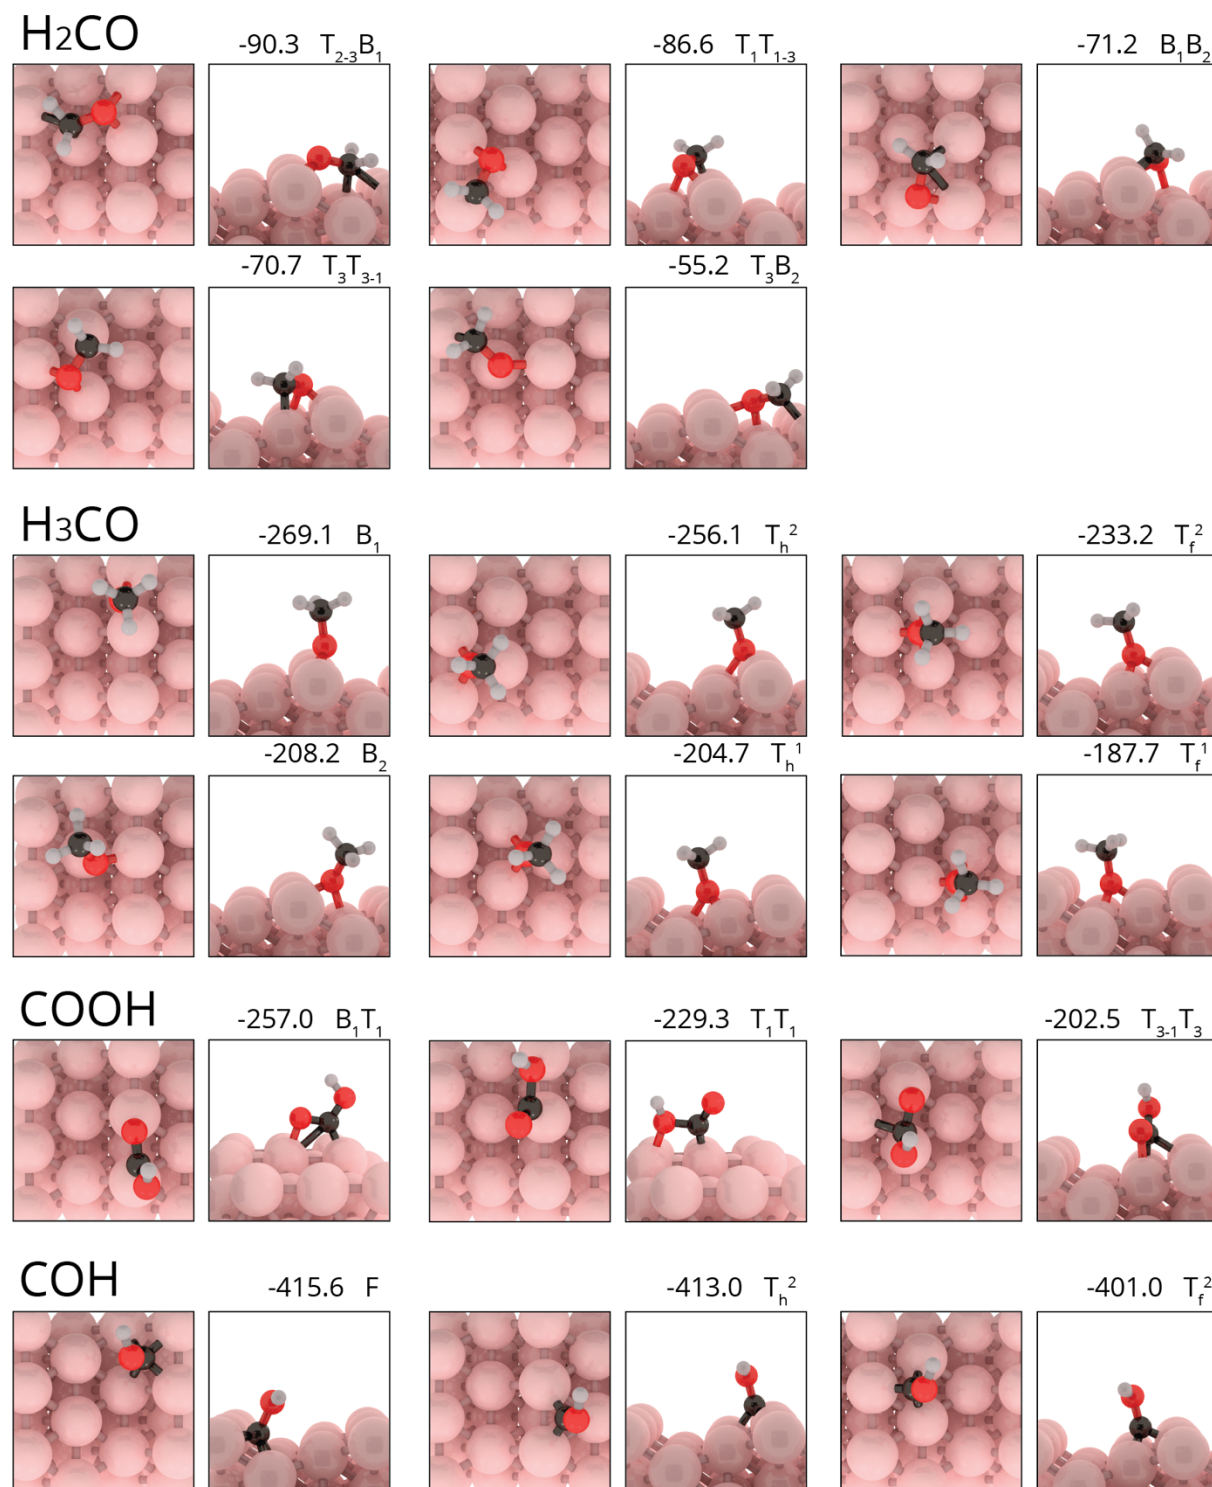

Figure S 18. Top and side view of stable geometries for H<sub>2</sub>CO, H<sub>3</sub>CO, COOH and COH on Ni(211). Corresponding chemisorption energy (kJ/mol) and adsorption site is indicated above each picture frame.

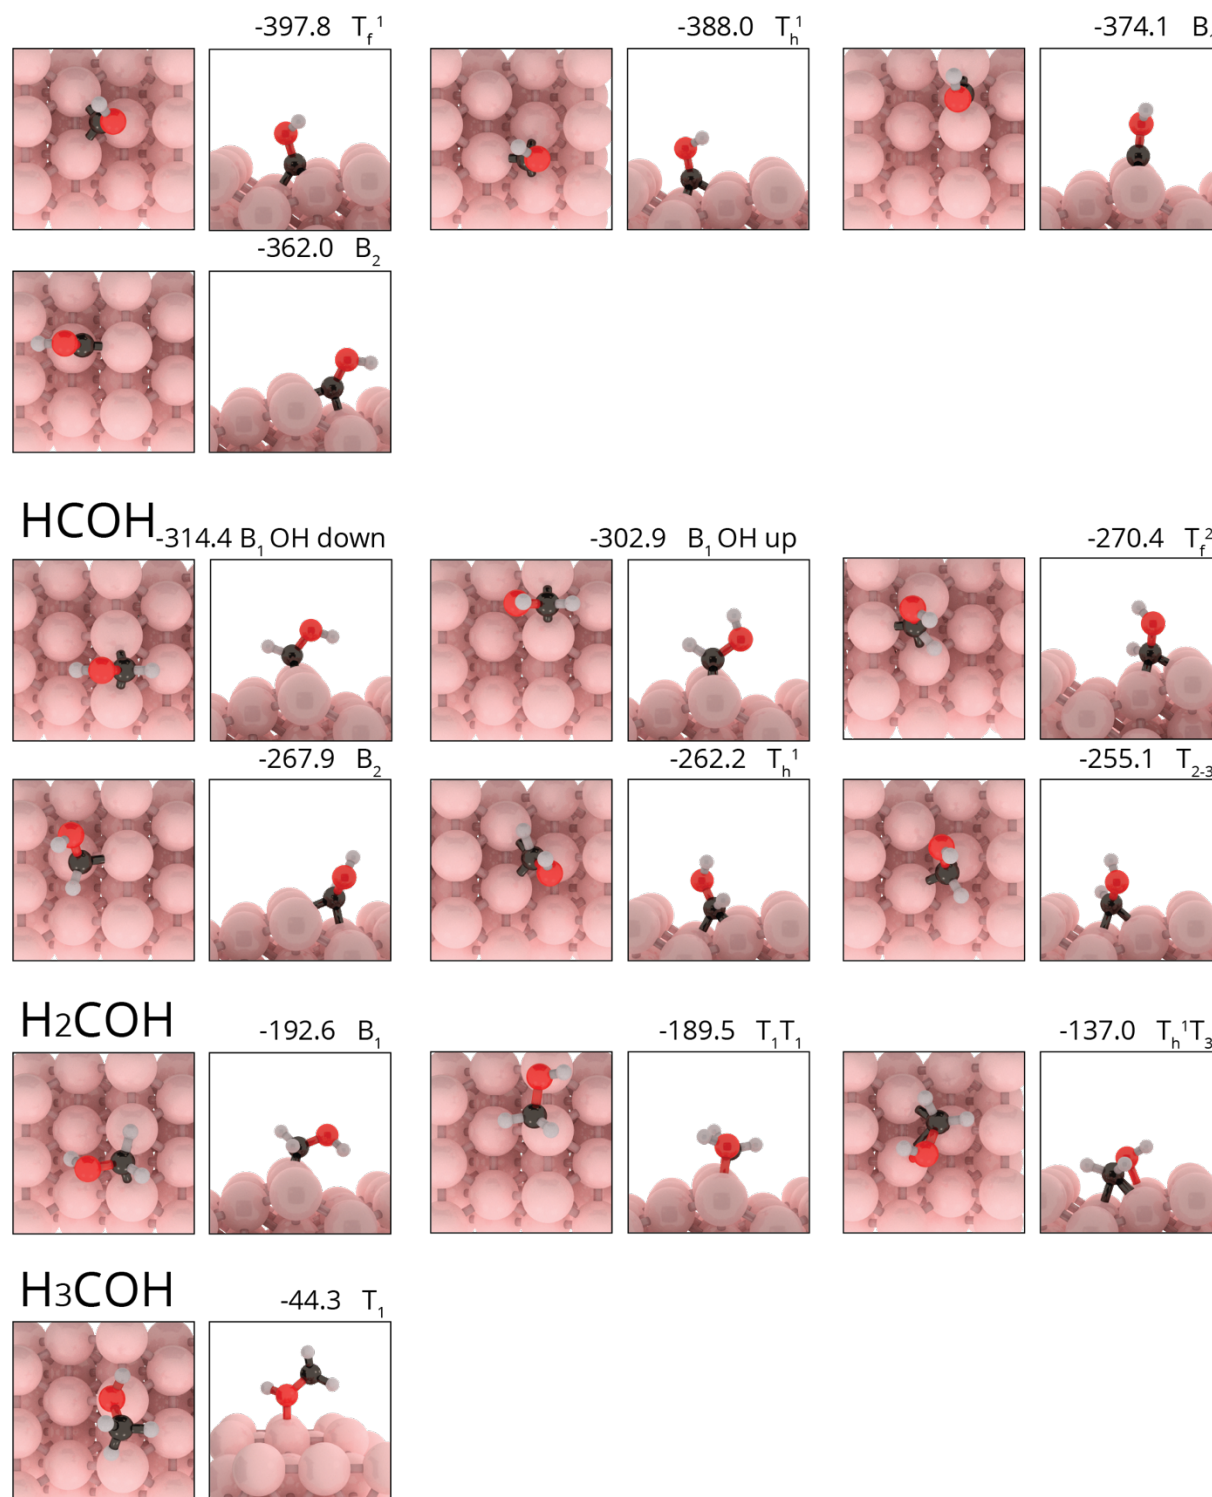

Figure S 19. Top and side view of stable geometries for COH, HCOH, H<sub>2</sub>COH and H<sub>3</sub>COH on Ni(211). Corresponding chemisorption energy (kJ/mol) and adsorption site is indicated above each picture frame.

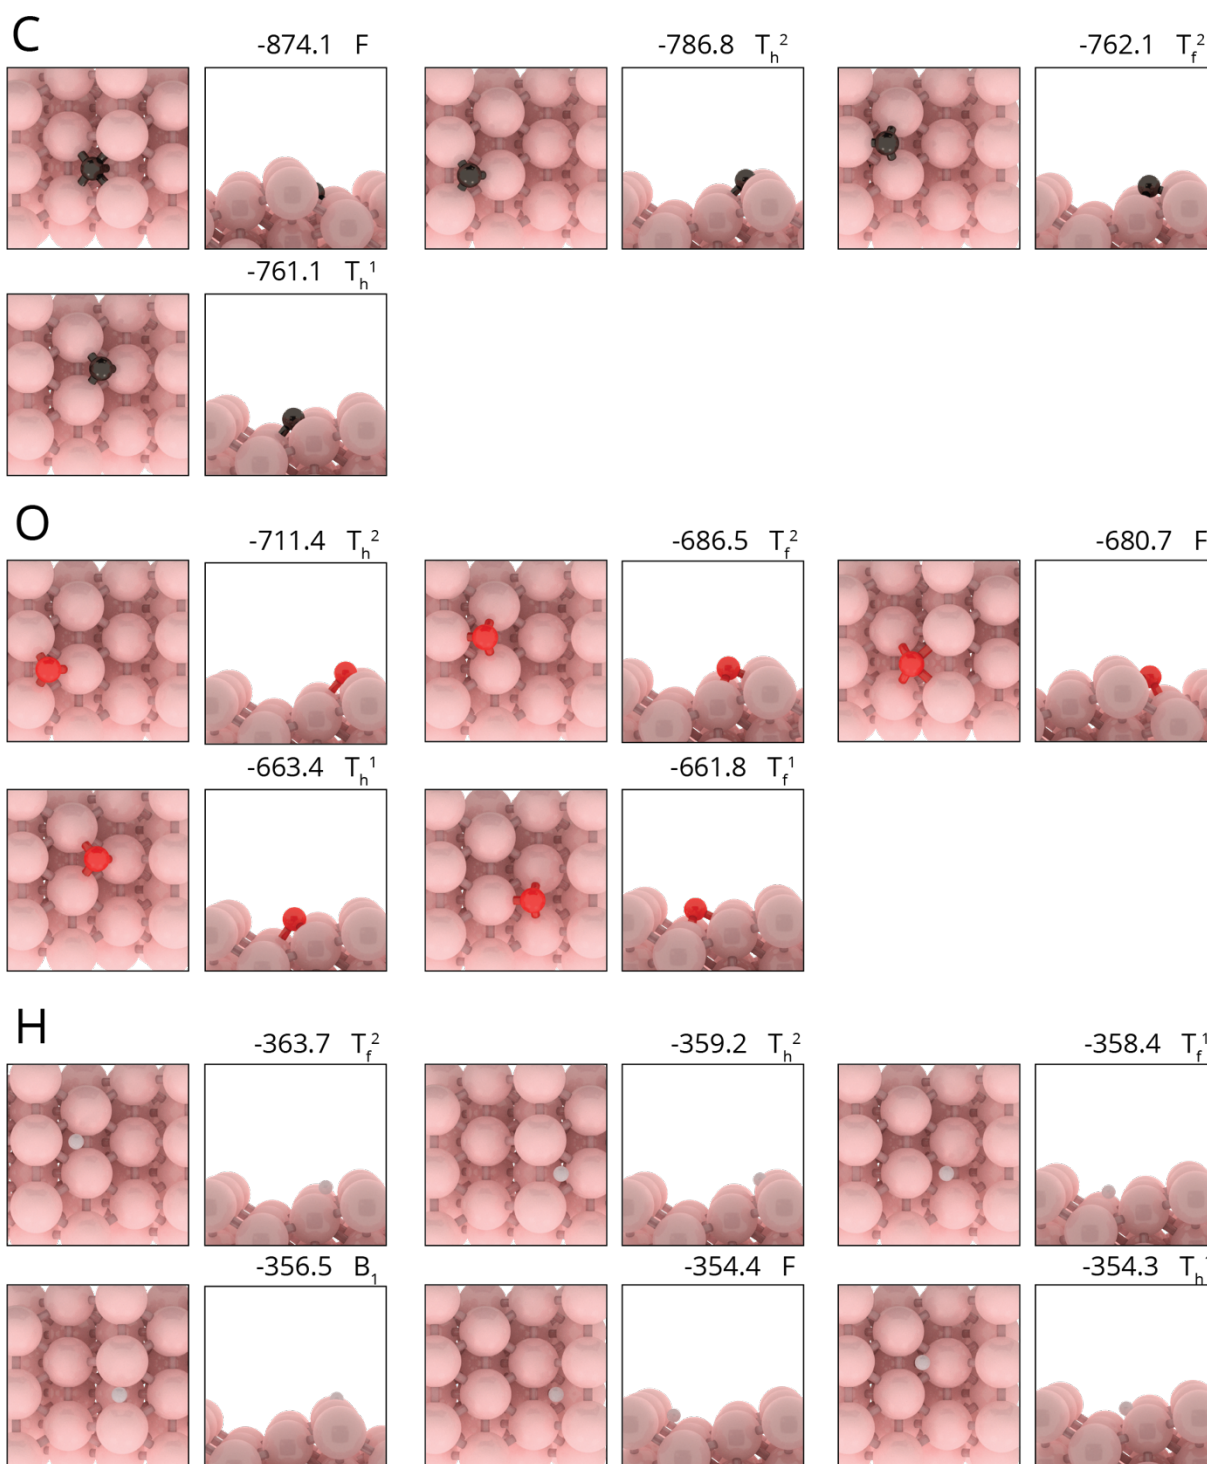

Figure S 20. Top and side view of stable geometries for C, O and H on Ni(211). Corresponding chemisorption energy (kJ/mol) and adsorption site is indicated above each picture frame.

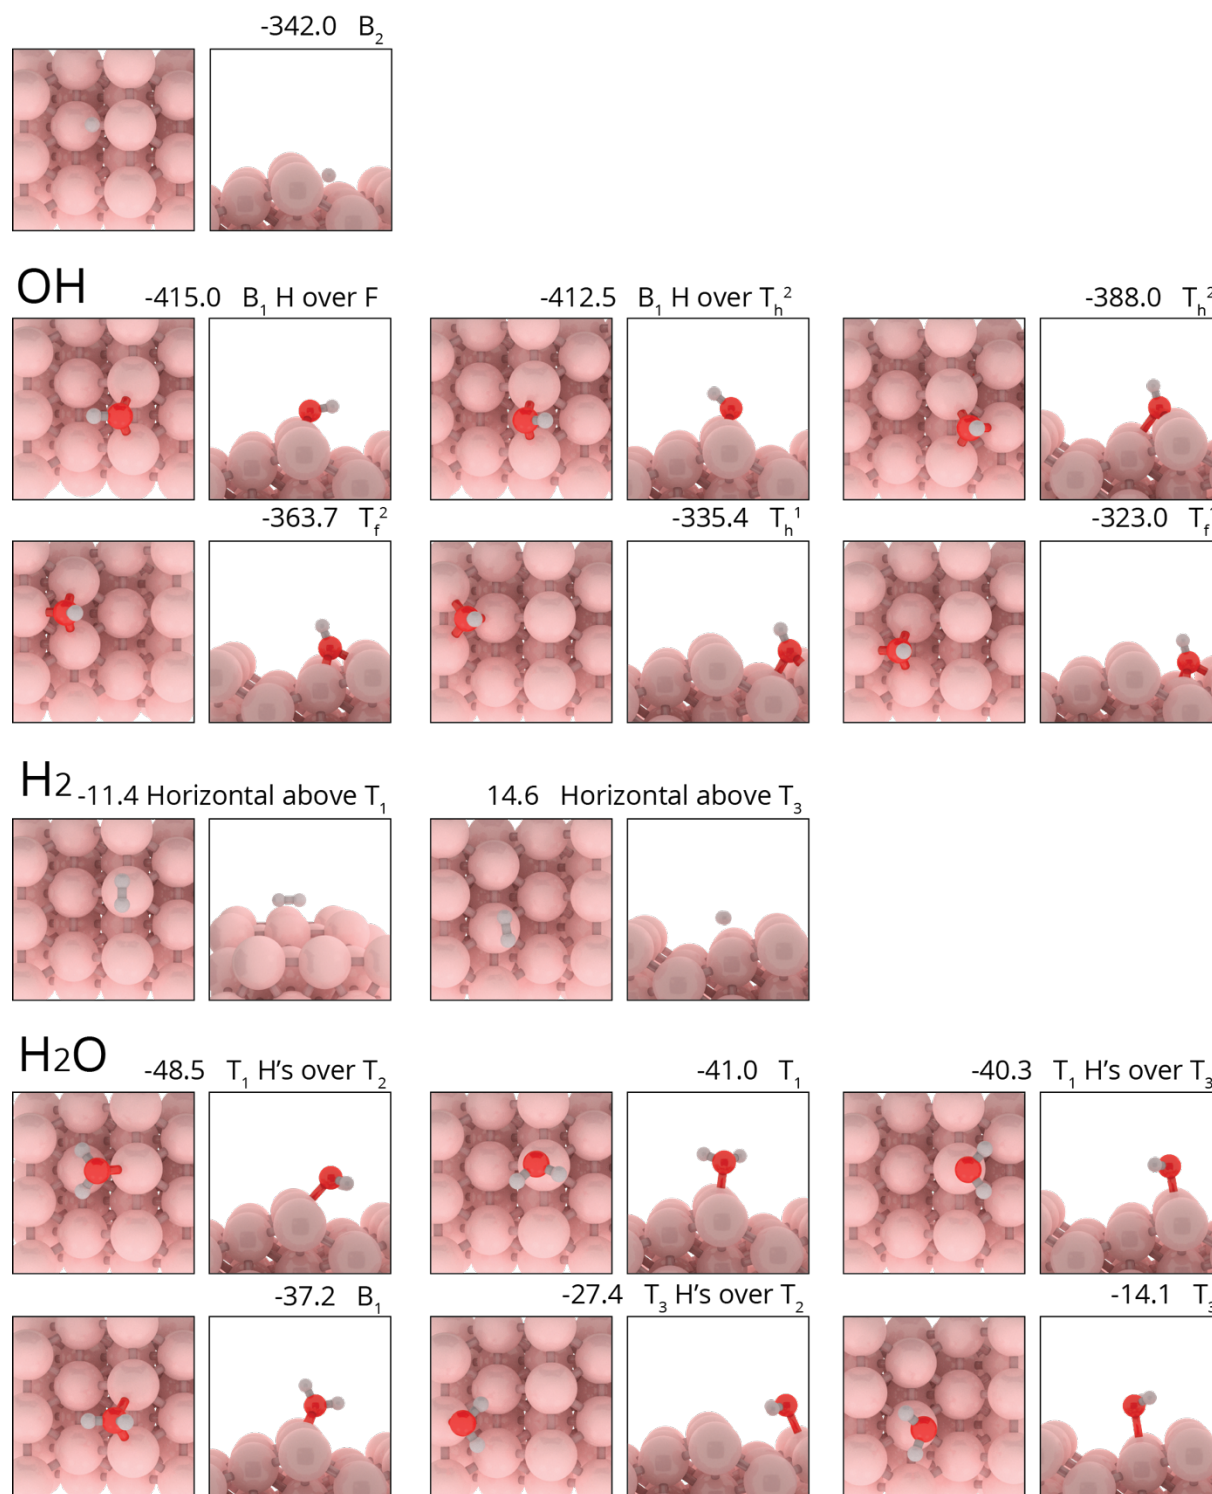

Figure S 21. Top and side view of stable geometries for H, OH, H<sub>2</sub> and H<sub>2</sub>O on Ni(211). Corresponding chemisorption energy (kJ/mol) and adsorption site is indicated above each picture frame.

## E Table Adsorption Energy of Stable Geometries

In Table S 8 to Table S 11 adsorption energies (kJ/mol) of stable geometries on Ni(111), Ni(100), Ni(110) and Ni(211).

Table S 8. Adsorption energies (kJ/mol) of stable geometries on Ni(111).

| Ni(111)            |                        |                  |                  |                 |                  |
|--------------------|------------------------|------------------|------------------|-----------------|------------------|
| Adsorbate          | Adsorption Site        | $E_{\text{ads}}$ | Adsorbate        | Adsorption Site | $E_{\text{ads}}$ |
| CO <sub>2</sub>    | T <sub>f</sub> TT      | 24.3             | C                | T <sub>h</sub>  | -773.8           |
|                    | TT                     | 26.6             |                  | T <sub>f</sub>  | -770.0           |
|                    | BTT                    | 35.5             | O                | T <sub>f</sub>  | -692.4           |
| CO                 | T <sub>h</sub>         | -178.6           |                  | T <sub>h</sub>  | -680.9           |
|                    | T <sub>f</sub>         | -178.1           | H                | T <sub>f</sub>  | -361.7           |
|                    | B                      | -158.8           |                  | B               | -361.6           |
|                    | T                      | -144.3           |                  | T <sub>h</sub>  | -360.9           |
| CH                 | T <sub>f</sub>         | -603.3           |                  | T               | -310.6           |
| CH                 | T <sub>h</sub>         | -600.5           | OH               | T <sub>f</sub>  | -364.9           |
|                    | CH <sub>2</sub>        | T <sub>f</sub>   |                  | -454.2          | T <sub>h</sub>   |
| T <sub>h</sub>     |                        | -449.7           | B                | -352.1          |                  |
| CH <sub>3</sub>    | T <sub>f</sub>         | -238.3           | H <sub>2</sub>   | Above B         | 38.8             |
|                    | T <sub>h</sub>         | -235.8           |                  | Above T         | 39.2             |
| CH <sub>4</sub>    | Above T                | 43.6             | H <sub>2</sub> O | T               | -22.5            |
| HCOO               | TT                     | -277.3           |                  |                 |                  |
|                    | T <sub>f</sub>         | -224.3           |                  |                 |                  |
|                    | T <sub>h</sub>         | -218.1           |                  |                 |                  |
| HCO                | BT over T <sub>f</sub> | -201.2           |                  |                 |                  |
|                    | BT over T <sub>h</sub> | -200.8           |                  |                 |                  |
|                    | T                      | -165.9           |                  |                 |                  |
| H <sub>2</sub> CO  | T <sub>f</sub> T       | -57.7            |                  |                 |                  |
|                    | T <sub>h</sub> T       | -57.3            |                  |                 |                  |
| H <sub>3</sub> CO  | T <sub>h</sub>         | -218.0           |                  |                 |                  |
|                    | T <sub>f</sub>         | -206.4           |                  |                 |                  |
| COOH               | BT over T <sub>f</sub> | -210.9           |                  |                 |                  |
|                    | TT                     | -210.7           |                  |                 |                  |
|                    | BT over T <sub>h</sub> | -209.5           |                  |                 |                  |
|                    | TT                     | -188.7           |                  |                 |                  |
| COH                | T <sub>h</sub>         | -410.5           |                  |                 |                  |
|                    | T <sub>f</sub>         | -410.4           |                  |                 |                  |
| HCOH               | T <sub>h</sub>         | -270.8           |                  |                 |                  |
| H <sub>2</sub> COH | BT over T <sub>h</sub> | -146.7           |                  |                 |                  |
|                    | BT over T <sub>f</sub> | -145.5           |                  |                 |                  |
| H <sub>3</sub> COH | T                      | -23.6            |                  |                 |                  |

Table S 9. Adsorption energies (kJ/mol) of stable geometries on Ni(100).

| Ni(100)            |                    |                  |
|--------------------|--------------------|------------------|
| Adsorbate          | Adsorption Site    | $E_{\text{ads}}$ |
| CO <sub>2</sub>    | BTT                | -16.3            |
|                    | TT                 | -6.5             |
| CO                 | F                  | -174.8           |
|                    | B                  | -166.3           |
|                    | T                  | -147.6           |
| CH                 | F                  | -667.6           |
| CH <sub>2</sub>    | F horizontal       | -490.9           |
|                    | F diagonal         | -485.6           |
|                    | B                  | -436.8           |
| CH <sub>3</sub>    | B                  | -233.8           |
| CH <sub>4</sub>    | Above T            | 43.8             |
| HCOO               | TT over F          | -293.8           |
|                    | BB                 | -292.6           |
|                    | TT over B          | -257.8           |
|                    | F                  | -240.9           |
| HCO                | BB                 | -264.6           |
| H <sub>2</sub> CO  | BB                 | -127.9           |
| H <sub>3</sub> CO  | F                  | -251.9           |
| COOH               | TT                 | -232.9           |
|                    | TT                 | -207.9           |
| COH                | F                  | -447.5           |
|                    | B                  | -375.1           |
| HCOH               | B                  | -285.2           |
| H <sub>2</sub> COH | TT                 | -161.9           |
|                    | B                  | -159.4           |
| H <sub>3</sub> COH | T                  | -29.0            |
| C                  | F                  | -909.4           |
| O                  | F                  | -724.2           |
| H                  | F                  | -364.5           |
|                    | B                  | -350.5           |
|                    | T                  | -311.6           |
| OH                 | F                  | -388.4           |
|                    | B                  | -381.6           |
| H <sub>2</sub>     | Horizontal above T | -1.0             |
|                    | Vertical above T   | 27.2             |
|                    | Vertical above B   | 29.0             |
| H <sub>2</sub> O   | T                  | -31.1            |

Table S 10. Adsorption energies (kJ/mol) of stable geometries on Ni(110).

| Ni(110)            |                                                   |                               |                  |                                         |                  |
|--------------------|---------------------------------------------------|-------------------------------|------------------|-----------------------------------------|------------------|
| Adsorbate          | Adsorption Site                                   | $E_{\text{ads}}$              | Adsorbate        | Adsorption Site                         | $E_{\text{ads}}$ |
| CO <sub>2</sub>    | T <sub>1</sub> T <sub>1</sub> T <sub>1</sub>      | -41.9                         | C                | B <sub>2</sub>                          | -836.1           |
|                    | T <sub>2</sub> B <sub>1</sub> B <sub>1</sub>      | -38.9                         |                  | T <sub>2</sub>                          | -819.0           |
|                    | B <sub>1</sub> T <sub>1</sub> T <sub>1</sub>      | -35.0                         |                  | B <sub>1</sub>                          | -699.6           |
| CO                 | B <sub>1</sub>                                    | -174.5                        | O                | T <sub>f</sub>                          | -676.4           |
|                    | T <sub>1</sub>                                    | -157.3                        |                  | B <sub>1</sub>                          | -671.2           |
|                    | B <sub>2</sub>                                    | -145.6                        |                  | T <sub>2</sub>                          | -654.5           |
| CH                 | T <sub>1</sub> T <sub>1</sub>                     | -613.7                        |                  | T <sub>1-1-2</sub>                      | -653.4           |
|                    | T <sub>2</sub>                                    | -600.7                        | H                | B <sub>2</sub>                          | -351.6           |
|                    | B <sub>1</sub>                                    | -522.7                        |                  | B <sub>1</sub>                          | -349.1           |
| CH <sub>2</sub>    | T <sub>2</sub>                                    | -452.9                        |                  | T <sub>2</sub>                          | -341.6           |
|                    | B <sub>1</sub>                                    | -442.2                        | T <sub>1</sub>   | -308.8                                  |                  |
| CH <sub>3</sub>    | B <sub>1</sub>                                    | -252.2                        | OH               | B <sub>1</sub>                          | -398.6           |
| CH <sub>4</sub>    | Above T <sub>1</sub>                              | 42.8                          |                  | T <sub>1-1</sub>                        | -358.1           |
| HCOO               | T <sub>1</sub> T <sub>1</sub> over B <sub>2</sub> | -327.8                        | H <sub>2</sub>   | Horizontal above T <sub>1</sub>         | -34.9            |
|                    | T <sub>1-1</sub> T <sub>1-1</sub>                 | -251.8                        |                  | Vertical above T <sub>1</sub>           | 26.3             |
|                    | T <sub>1-1</sub>                                  | -229.3                        |                  | Vertical above B <sub>1</sub>           | 27.9             |
|                    |                                                   | Vertical above T <sub>2</sub> |                  | 28.8                                    |                  |
| HCO                | T <sub>f</sub> B <sub>1</sub>                     | -239.6                        | H <sub>2</sub> O | T <sub>1</sub> H's above T <sub>2</sub> | -38.5            |
|                    | T <sub>2</sub> T <sub>1-1</sub>                   | -217.2                        |                  | T <sub>1</sub>                          | -38.5            |
|                    | B <sub>1</sub>                                    | -206.5                        |                  |                                         |                  |
|                    | T <sub>1-1</sub> B <sub>1</sub>                   | -200.8                        |                  |                                         |                  |
|                    | T <sub>f</sub> B <sub>1</sub>                     | -176.0                        |                  |                                         |                  |
| H <sub>2</sub> CO  | T <sub>f</sub> B <sub>1</sub>                     | -121.8                        |                  |                                         |                  |
|                    | B <sub>1</sub> T <sub>1</sub>                     | -94.1                         |                  |                                         |                  |
|                    | T <sub>1-1</sub> T <sub>1-1</sub>                 | -71.7                         |                  |                                         |                  |
| H <sub>3</sub> CO  | B <sub>1</sub>                                    | -259.5                        |                  |                                         |                  |
|                    | T <sub>1-1</sub>                                  | -211.6                        |                  |                                         |                  |
| COOH               | T <sub>1-1</sub>                                  | -248.1                        |                  |                                         |                  |
|                    | T <sub>1-1</sub>                                  | -247.7                        |                  |                                         |                  |
|                    | T <sub>1-1</sub>                                  | -229.1                        |                  |                                         |                  |
|                    | T <sub>1-1</sub>                                  | -224.6                        |                  |                                         |                  |
| COH                | B <sub>2</sub>                                    | -378.9                        |                  |                                         |                  |
|                    | B <sub>1</sub>                                    | -362.0                        |                  |                                         |                  |
|                    | T <sub>1</sub>                                    | -251.3                        |                  |                                         |                  |
| HCOH               | B <sub>1</sub>                                    | -317.3                        |                  |                                         |                  |
|                    | T <sub>1-1</sub>                                  | -250.0                        |                  |                                         |                  |
| H <sub>2</sub> COH | T <sub>1</sub> T <sub>1</sub>                     | -173.6                        |                  |                                         |                  |
|                    | B <sub>1</sub>                                    | -166.9                        |                  |                                         |                  |
| H <sub>3</sub> COH | T <sub>1</sub>                                    | -40.7                         |                  |                                         |                  |
|                    | B <sub>1</sub>                                    | -32.8                         |                  |                                         |                  |

Table S 11. Adsorption energies (kJ/mol) of stable geometries on Ni(211). Table continues on next page.

| Ni(211) part 1              |                                                           |                             |                                            |                                 |                  |
|-----------------------------|-----------------------------------------------------------|-----------------------------|--------------------------------------------|---------------------------------|------------------|
| Adsorbate                   | Adsorption Site                                           | $E_{\text{ads}}$            | Adsorbate                                  | Adsorption Site                 | $E_{\text{ads}}$ |
| CO <sub>2</sub>             | B <sub>1</sub> T <sub>1</sub> T <sub>1</sub>              | -39.1                       | H <sub>3</sub> CO                          | B <sub>1</sub> B <sub>2</sub>   | -71.2            |
|                             | B <sub>3</sub> B <sub>1</sub> T <sub>3</sub>              | -39.1                       |                                            | T <sub>3</sub> T <sub>3-1</sub> | -70.7            |
|                             | T <sub>f</sub> <sup>2</sup> B <sub>1</sub>                | -20.9                       |                                            | T <sub>3</sub> B <sub>2</sub>   | -55.2            |
|                             | T <sub>h</sub> <sup>1</sup> T <sub>1</sub> B <sub>4</sub> | -14.8                       |                                            | B <sub>1</sub>                  | -269.1           |
|                             | T <sub>1</sub> T <sub>1</sub>                             | 4.6                         |                                            | T <sub>h</sub> <sup>2</sup>     | -256.1           |
|                             | B <sub>1</sub> T <sub>f</sub> <sup>1</sup>                | 10.3                        |                                            | T <sub>f</sub> <sup>2</sup>     | -233.2           |
|                             | T <sub>1</sub> T <sub>1</sub>                             | 17.8                        |                                            | B <sub>2</sub>                  | -208.2           |
| CO                          | T <sub>h</sub> <sup>2</sup>                               | -186.7                      | T <sub>h</sub> <sup>1</sup>                | -204.7                          |                  |
|                             | B <sub>1</sub>                                            | -182.5                      | T <sub>f</sub> <sup>1</sup>                | -187.7                          |                  |
|                             | T <sub>f</sub> <sup>2</sup>                               | -177.2                      | COOH                                       | B <sub>1</sub> T <sub>1</sub>   | -257.0           |
|                             | T <sub>h</sub> <sup>1</sup>                               | -172.9                      |                                            | T <sub>1</sub> T <sub>1</sub>   | -229.3           |
|                             | T <sub>1</sub>                                            | -165.0                      |                                            | T <sub>3-1</sub> T <sub>3</sub> | -202.5           |
|                             | T <sub>f</sub> <sup>1</sup>                               | -160.3                      | COH                                        | F                               | -415.6           |
|                             | F                                                         | -159.2                      |                                            | T <sub>h</sub> <sup>2</sup>     | -413.0           |
| B <sub>2</sub>              | -154.2                                                    | T <sub>f</sub> <sup>2</sup> |                                            | -401.0                          |                  |
| CH                          | F                                                         | -634.2                      | T <sub>h</sub> <sup>1</sup>                | -397.8                          |                  |
|                             | T <sub>h</sub> <sup>2</sup>                               | -603.0                      | T <sub>f</sub> <sup>1</sup>                | -388.0                          |                  |
|                             | T <sub>f</sub> <sup>2</sup>                               | -592.2                      | B <sub>1</sub>                             | -374.1                          |                  |
|                             | T <sub>h</sub> <sup>1</sup>                               | -590.3                      | B <sub>2</sub>                             | -362.0                          |                  |
| CH <sub>2</sub>             | T <sub>h</sub> <sup>2</sup>                               | -467.8                      | HCOH                                       | B <sub>1</sub> OH down          | -314.4           |
|                             | T <sub>f</sub> <sup>2</sup>                               | -443.9                      |                                            | B <sub>1</sub> OH up            | -302.9           |
|                             | T <sub>h</sub> <sup>1</sup>                               | -438.8                      |                                            | T <sub>f</sub> <sup>2</sup>     | -270.4           |
| CH <sub>3</sub>             | B <sub>1</sub>                                            | -265.6                      | B <sub>2</sub>                             | -267.9                          |                  |
|                             | T <sub>h</sub> <sup>2</sup>                               | -258.8                      | T <sub>h</sub> <sup>1</sup>                | -262.2                          |                  |
|                             | T <sub>h</sub> <sup>1</sup>                               | -211.6                      | T <sub>2-3</sub>                           | -255.1                          |                  |
| CH <sub>4</sub>             | Above T <sub>1</sub>                                      | 40.2                        | H <sub>2</sub> COH                         | B <sub>1</sub>                  | -192.6           |
| HCOO                        | T <sub>1</sub> T <sub>1</sub>                             | -340.6                      | T <sub>1</sub> T <sub>1</sub>              | -189.5                          |                  |
|                             | T <sub>1</sub> T <sub>2</sub>                             | -301.6                      | T <sub>h</sub> <sup>1</sup> T <sub>3</sub> | -137.0                          |                  |
|                             | B <sub>1</sub> over upper edge                            | -278.6                      | C                                          | F                               | -874.1           |
|                             | T <sub>3</sub> T <sub>3</sub>                             | -269.0                      |                                            | T <sub>h</sub> <sup>2</sup>     | -786.8           |
|                             | B <sub>1</sub> over lower edge                            | -264.2                      |                                            | T <sub>f</sub> <sup>1</sup>     | -762.1           |
| T <sub>F</sub> <sup>2</sup> | -224.8                                                    | T <sub>h</sub> <sup>1</sup> | -761.1                                     |                                 |                  |
| HCO                         | T <sub>f</sub> <sup>1</sup> B <sub>1</sub>                | -248.2                      | O                                          | T <sub>h</sub> <sup>2</sup>     | -711.4           |
|                             | T <sub>h</sub> <sup>2</sup> B <sub>1</sub>                | -237.0                      |                                            | T <sub>f</sub> <sup>2</sup>     | -686.5           |
|                             | T <sub>1-2-3</sub> B <sub>1</sub>                         | -227.4                      |                                            | F                               | -680.7           |
|                             | T <sub>h</sub> <sup>2</sup> T <sub>1</sub>                | -227.2                      |                                            | T <sub>h</sub> <sup>1</sup>     | -663.4           |
|                             | B <sub>2</sub> B <sub>1</sub>                             | -224.2                      |                                            | T <sub>f</sub> <sup>1</sup>     | -661.8           |
|                             | B <sub>2</sub> B <sub>2</sub>                             | -219.2                      | H                                          | T <sub>f</sub> <sup>2</sup>     | -363.7           |
| H <sub>2</sub> CO           | T <sub>2-3</sub> B <sub>1</sub>                           | -90.3                       |                                            | T <sub>h</sub> <sup>2</sup>     | -359.2           |
|                             | T <sub>1</sub> T <sub>1-3</sub>                           | -86.6                       | T <sub>f</sub> <sup>1</sup>                | -358.4                          |                  |



| Ni(211) part 2 |                                  |                  |                                    |                                    |                  |
|----------------|----------------------------------|------------------|------------------------------------|------------------------------------|------------------|
| Adsorbate      | Adsorption Site                  | $E_{\text{ads}}$ | Adsorbate                          | Adsorption Site                    | $E_{\text{ads}}$ |
| H              | B <sub>1</sub>                   | -356.5           | H <sub>2</sub>                     | horizontal above T <sub>1</sub>    | -38.9            |
|                | F                                | -354.4           |                                    | horizontal above T <sub>3</sub>    | -12.9            |
| OH             | T <sub>h</sub> <sup>1</sup>      | -354.3           | H <sub>2</sub> O                   | T <sub>1</sub> H's over lower edge | -48.5            |
|                | B <sub>2</sub>                   | -342.0           |                                    | T <sub>1</sub> H's over step edge  | -41.0            |
|                | B <sub>1</sub> H over lower edge | -415.0           | T <sub>1</sub> H's over upper edge | -40.3                              |                  |
|                | B <sub>1</sub> H over upper egde | -412.5           | B <sub>1</sub>                     | -37.2                              |                  |
|                | T <sub>h</sub> <sup>2</sup>      | -388.0           | T <sub>3</sub> H's over lower edge | -27.4                              |                  |
|                | T <sub>f</sub> <sup>2</sup>      | -363.7           | T <sub>3</sub> H's over upper edge | -14.1                              |                  |
|                | T <sub>h</sub> <sup>1</sup>      | -335.4           |                                    |                                    |                  |
|                | T <sub>f</sub> <sup>1</sup>      | -323.0           |                                    |                                    |                  |

## F Geometries of Elementary Reaction Steps

The geometries of the initial-, transition and final states of relevant elementary reaction steps in CO<sub>2</sub> methanation over four nickel facets shown in Figure S 22 to Figure S 30.

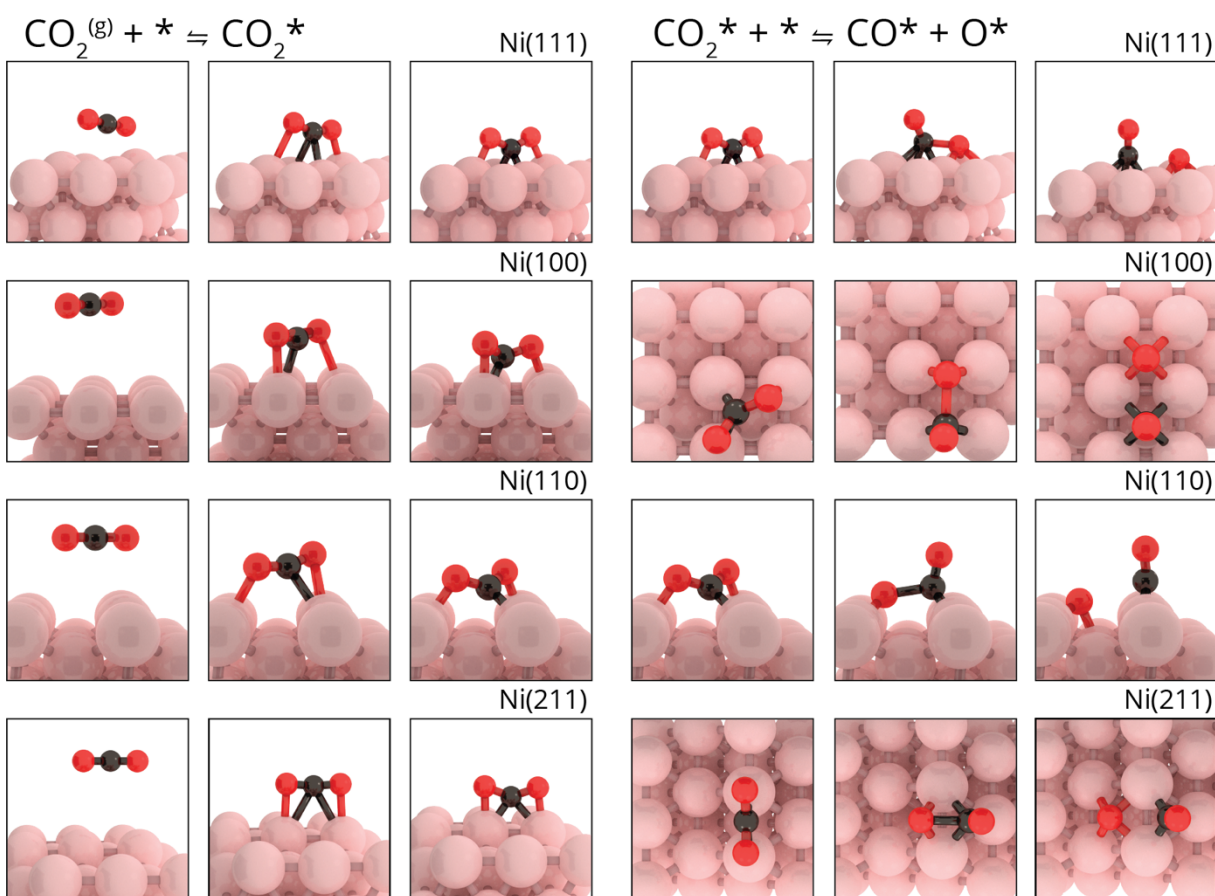

Figure S 22. Geometries of the initial, transition and final states for the elementary reactions  $\text{CO}_2^{(g)} + * \rightleftharpoons \text{CO}_2^*$  and  $\text{CO}_2^* + * \rightleftharpoons \text{CO}^* + \text{O}^*$ .

## F. Geometries of Elementary Reaction Steps

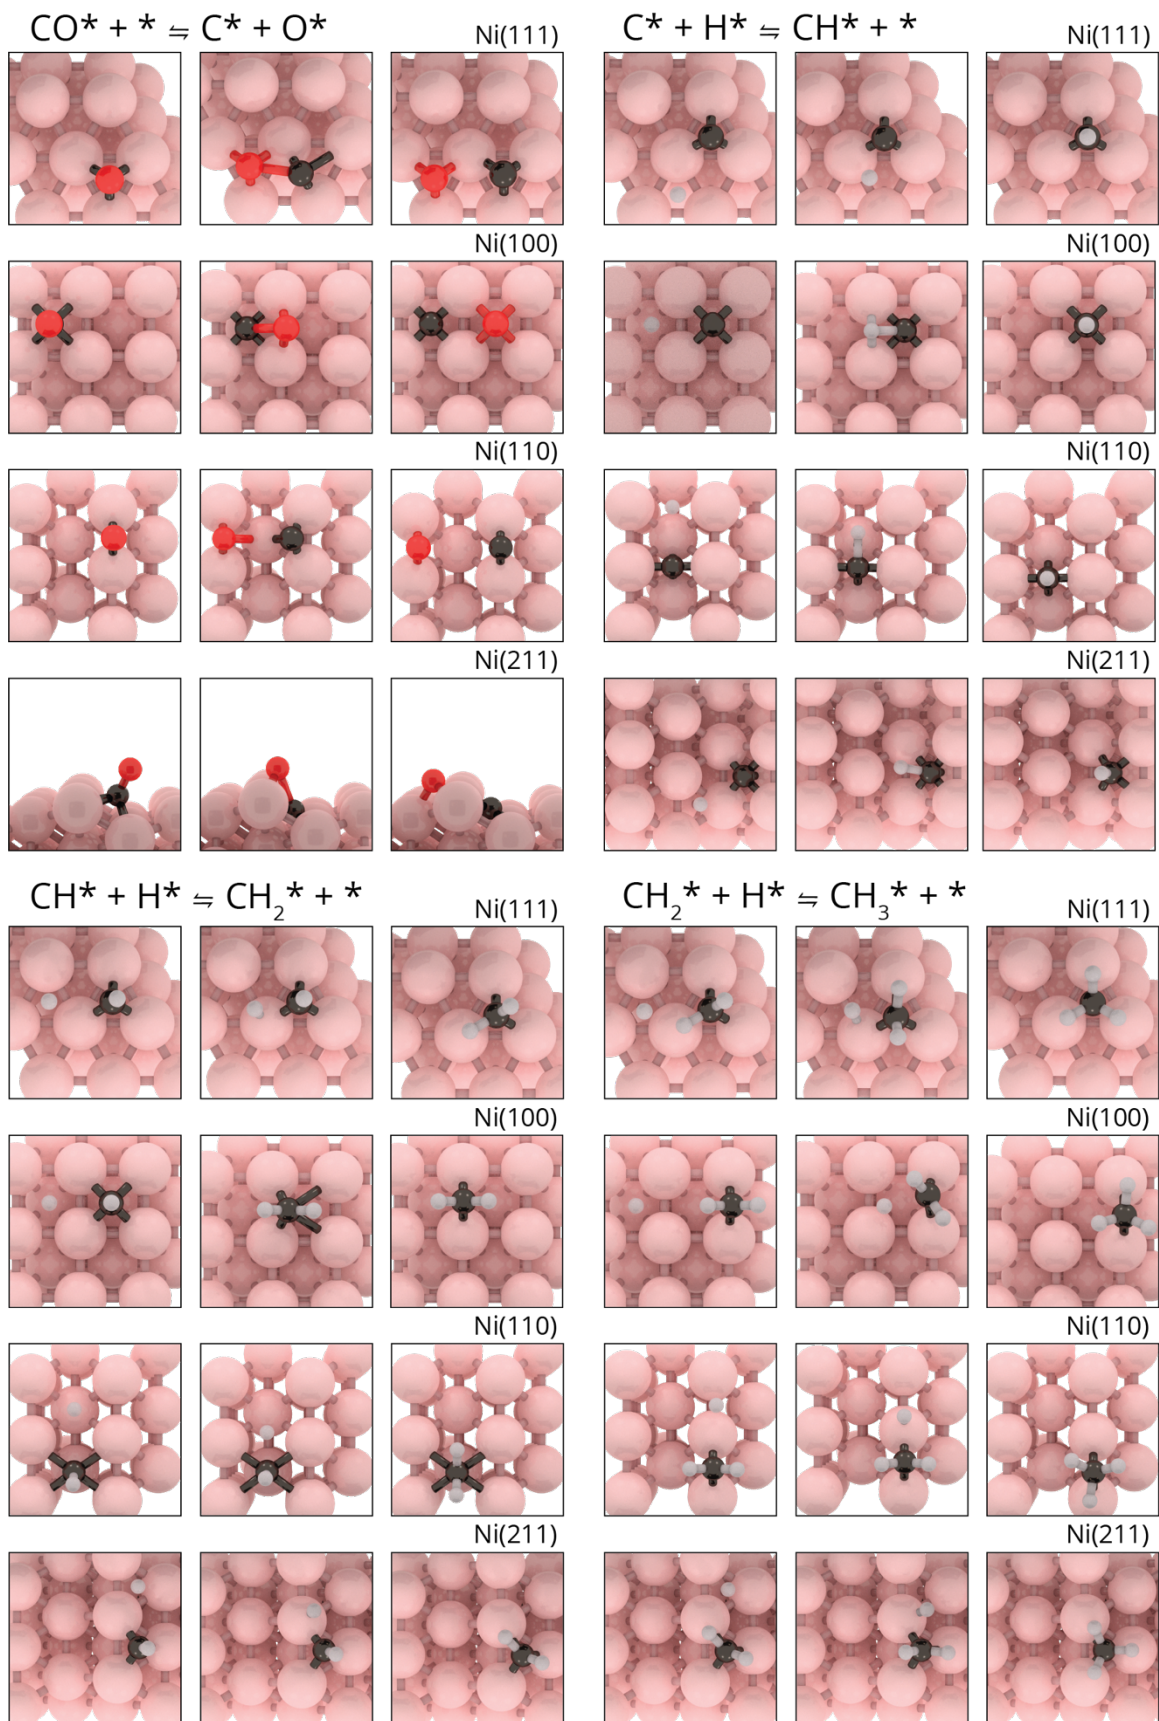

Figure S 23. Geometries of the initial, transition and final states for the elementary reactions  $\text{CO} + * \rightleftharpoons \text{C}^* + \text{O}^*$ ,  $\text{C}^* + \text{H}^* \rightleftharpoons \text{CH}^* + *$ ,  $\text{CH}^* + \text{H}^* \rightleftharpoons \text{CH}_2^* + *$  and  $\text{CH}_2^* + \text{H}^* \rightleftharpoons \text{CH}_3^* + *$ .

## F. Geometries of Elementary Reaction Steps

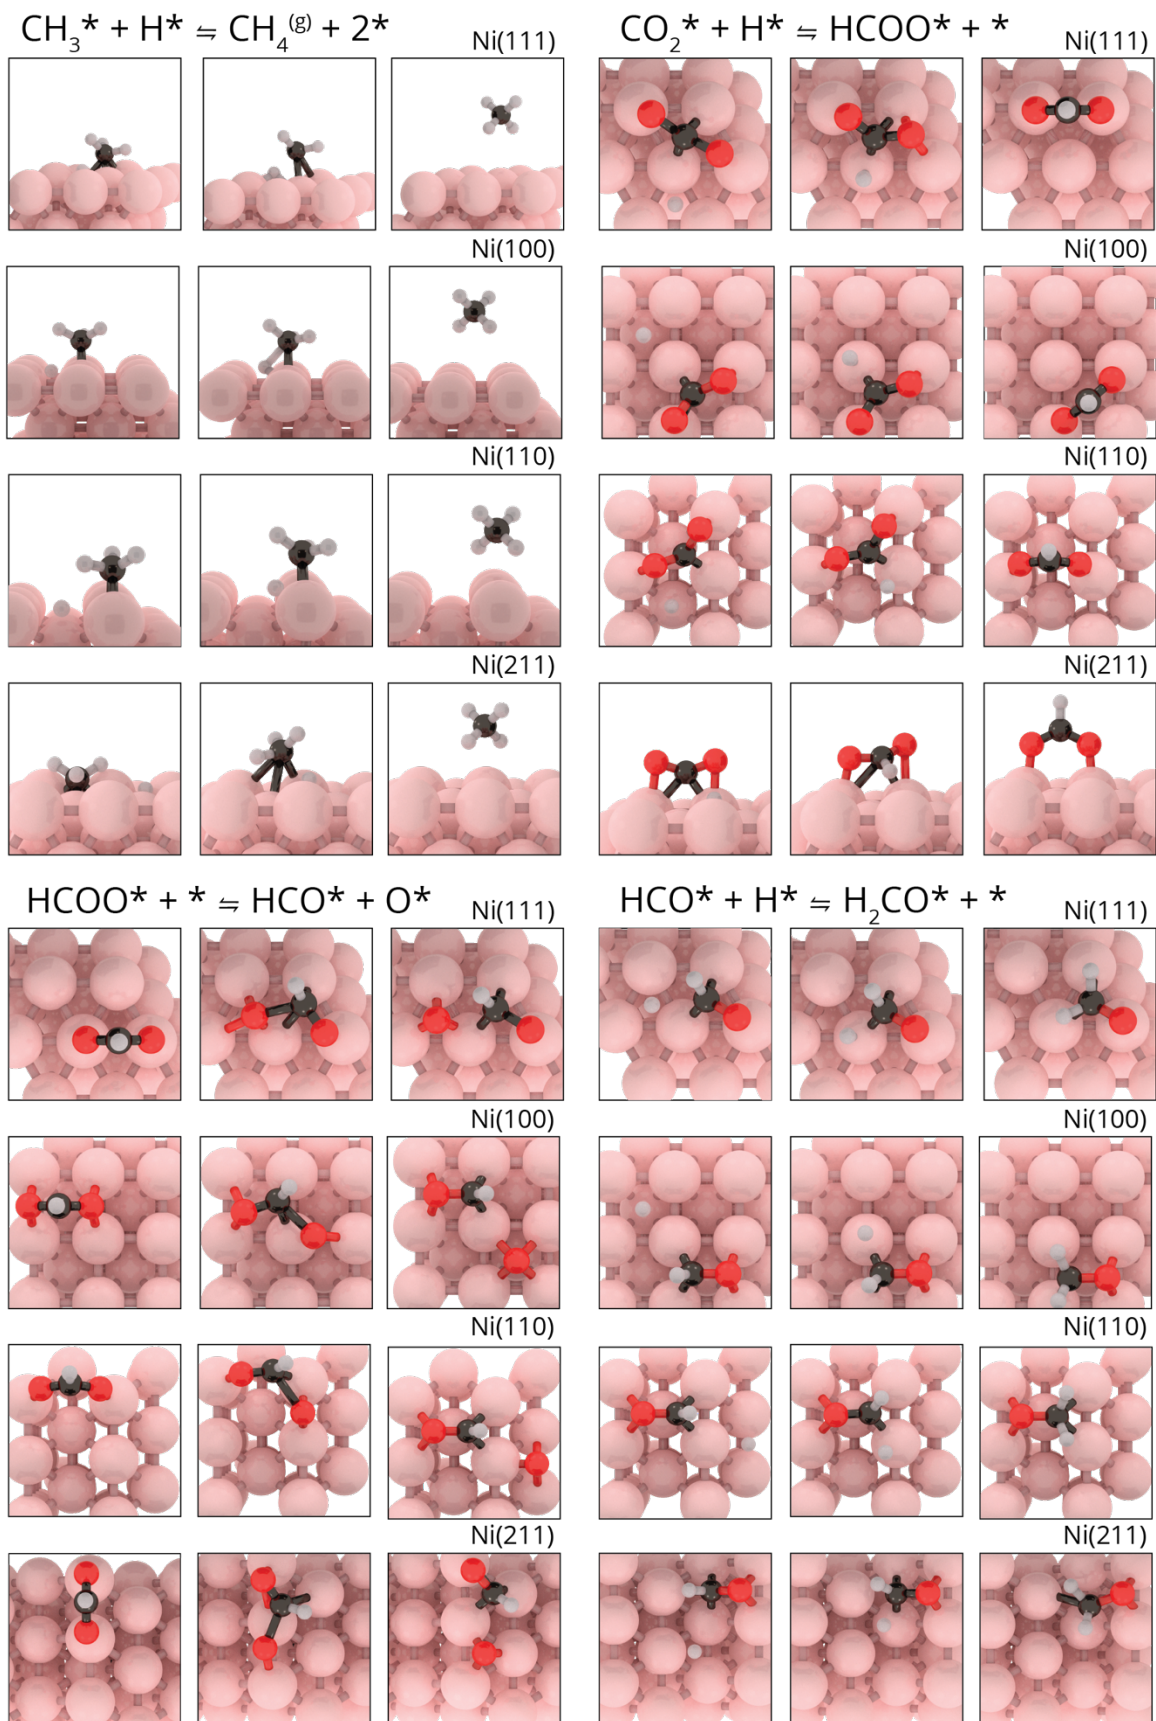

Figure S 24. Geometries of the initial, transition and final states for the elementary reactions  $\text{CH}_3^* + \text{H}^* \rightleftharpoons \text{CH}_4^{(g)} + 2^*$ ,  $\text{CO}_2^* + \text{H}^* \rightleftharpoons \text{HCOO}^* + ^*$ ,  $\text{HCOO}^* + ^* \rightleftharpoons \text{HCO}^* + \text{O}^*$  and  $\text{HCO}^* + \text{H}^* \rightleftharpoons \text{H}_2\text{CO}^* + ^*$ .

## F. Geometries of Elementary Reaction Steps

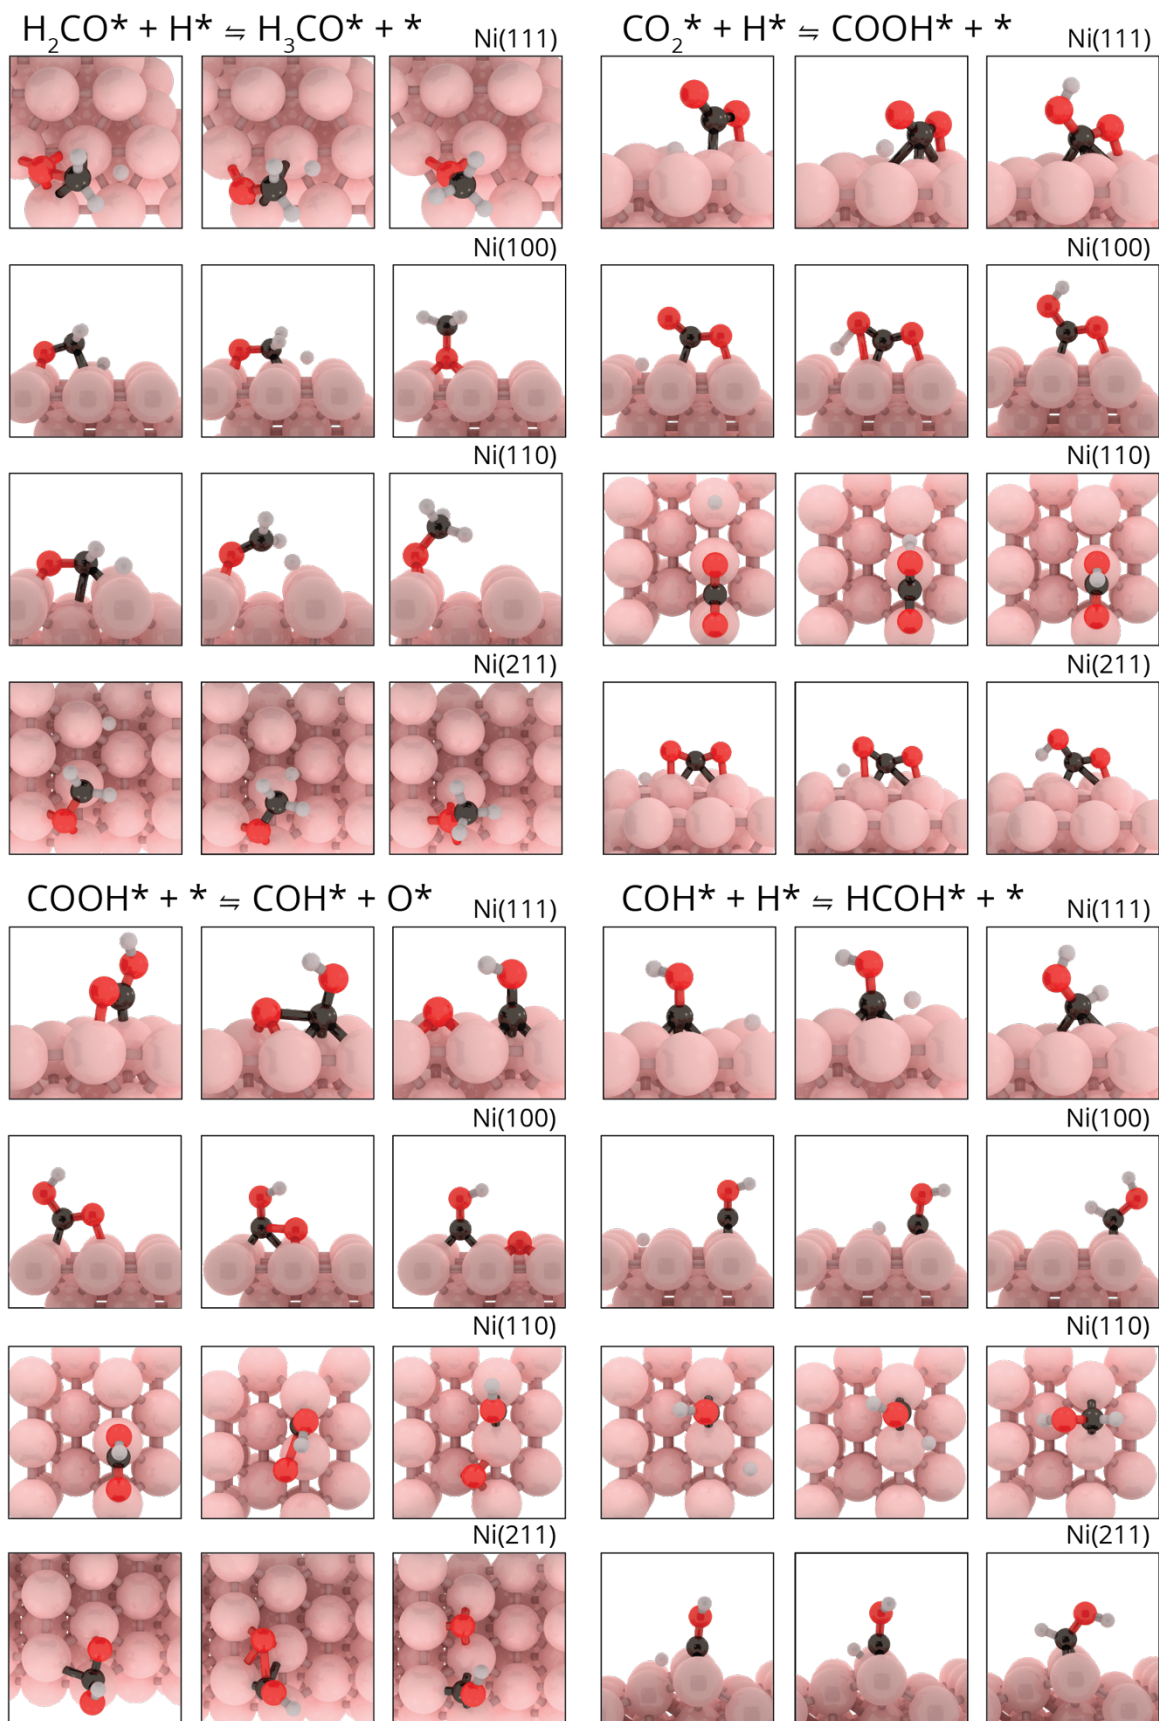

Figure S 25. Geometries of the initial, transition and final states for the elementary reactions  $\text{H}_2\text{CO}^* + \text{H}^* \rightleftharpoons \text{H}_3\text{CO}^* + *$ ,  $\text{CO}_2^* + \text{H}^* \rightleftharpoons \text{COOH}^* + *$ ,  $\text{COOH}^* + * \rightleftharpoons \text{COH}^* + \text{O}^*$  and  $\text{COH}^* + \text{H}^* \rightleftharpoons \text{HCOH}^* + *$ .

## F. Geometries of Elementary Reaction Steps

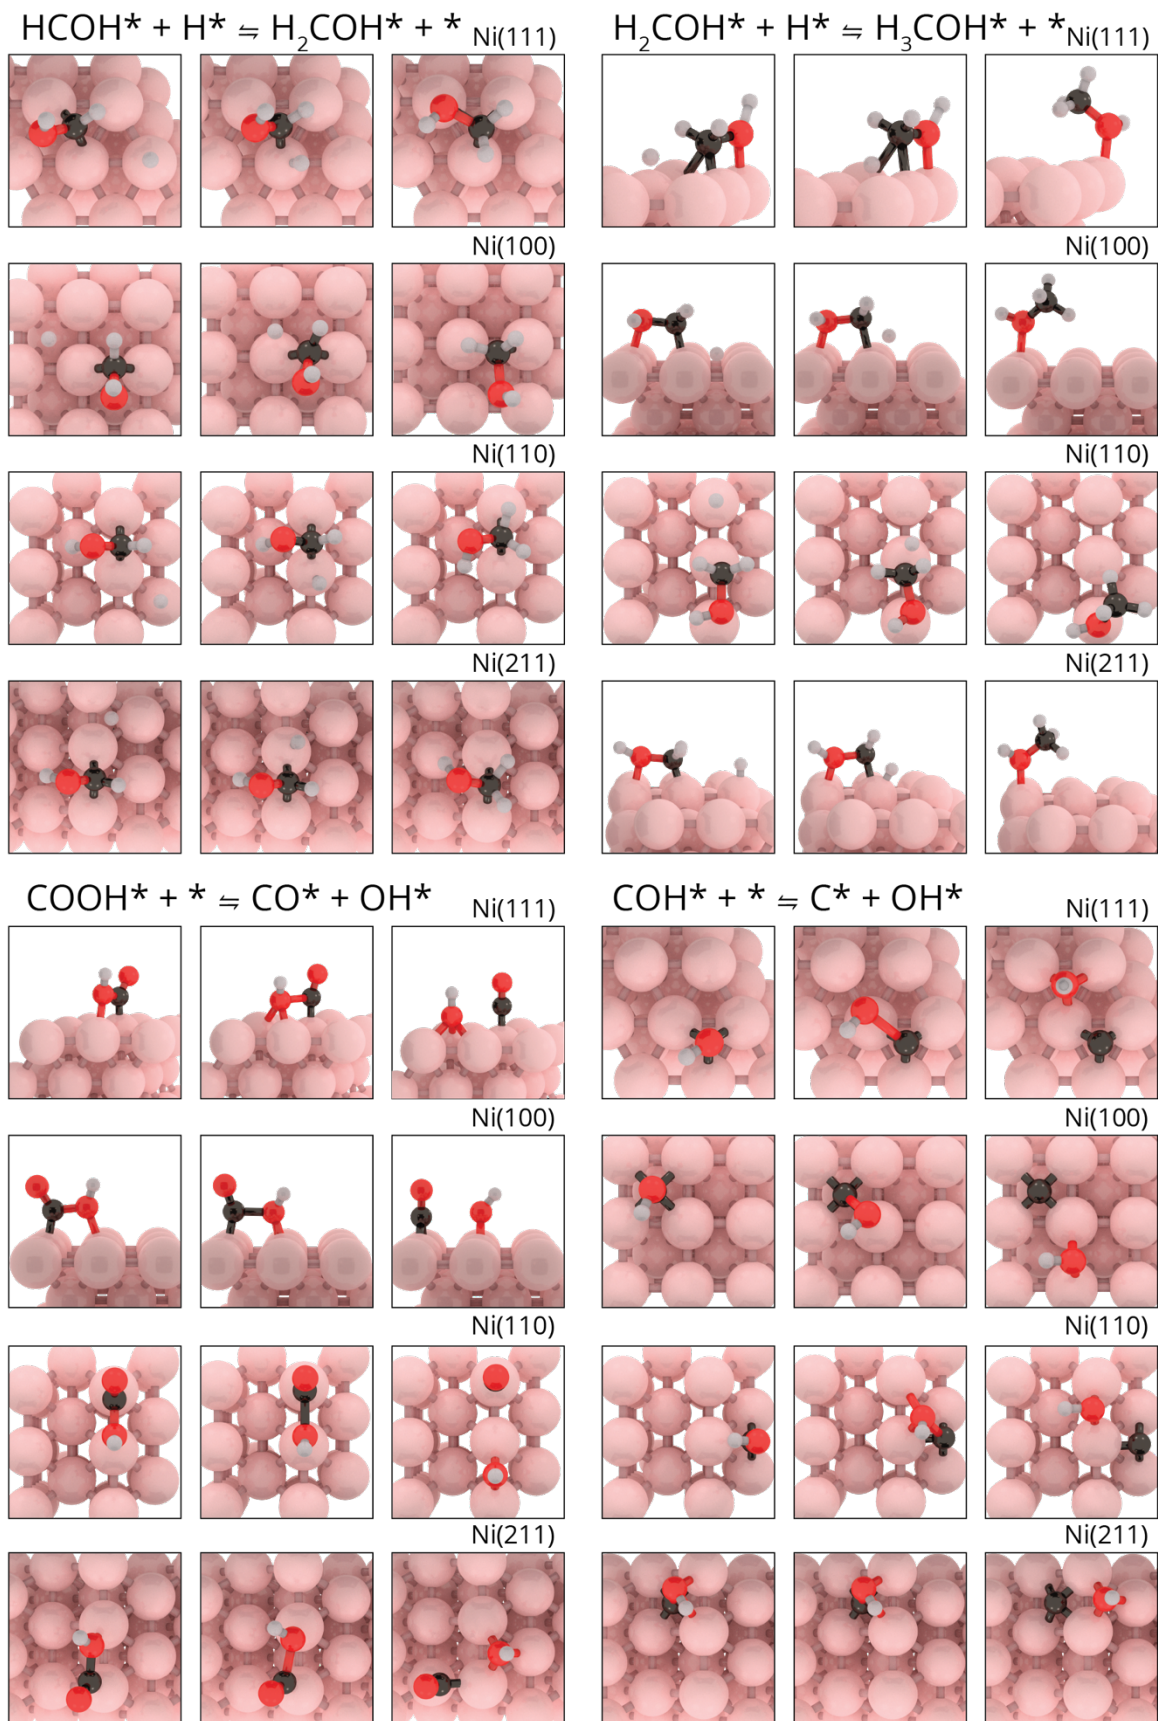

Figure S 26. Geometries of the initial, transition and final states for the elementary reactions  $\text{HCOH}^* + \text{H}^* \rightleftharpoons \text{H}_2\text{COH}^* + *$ ,  $\text{H}_2\text{COH}^* + \text{H}^* \rightleftharpoons \text{H}_3\text{COH}^* + *$ ,  $\text{COOH}^* + * \rightleftharpoons \text{CO}^* + \text{OH}^*$  and  $\text{COH}^* + * \rightleftharpoons \text{C}^* + \text{OH}^*$ .

## F. Geometries of Elementary Reaction Steps

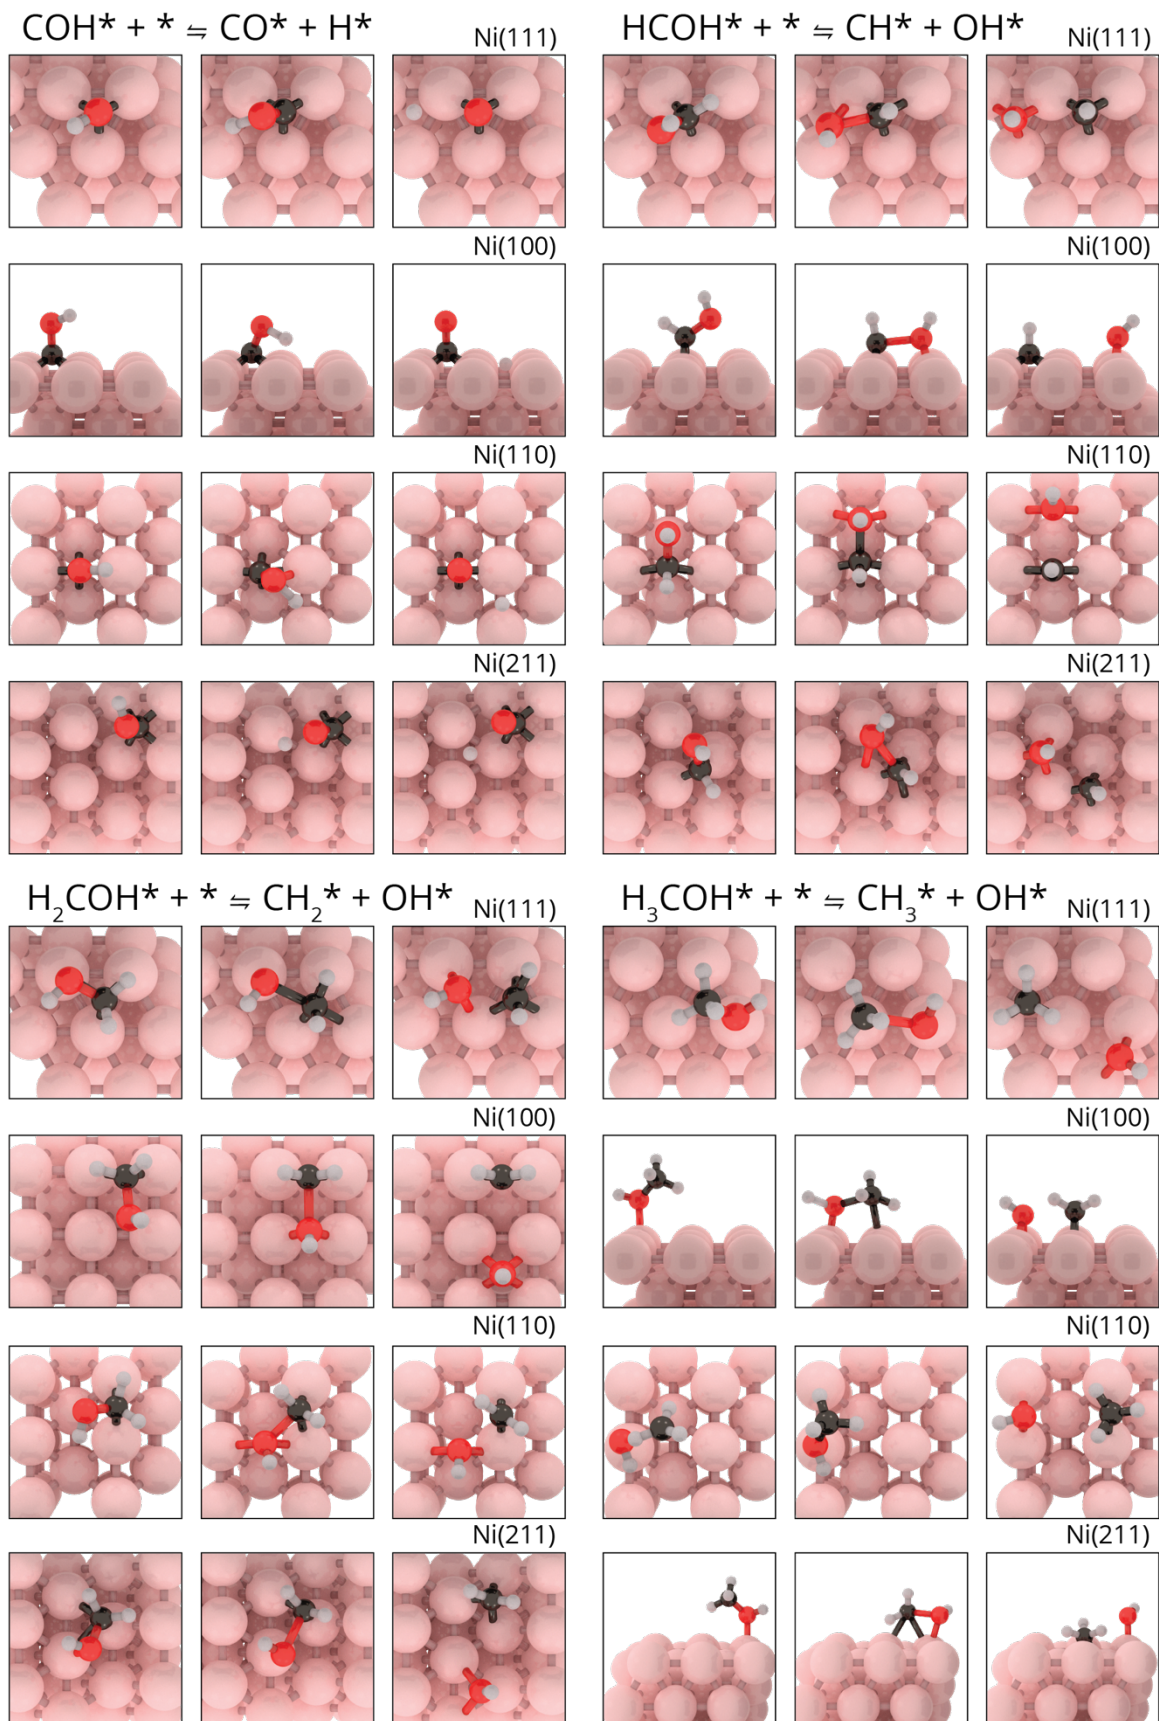

Figure S 27. Geometries of the initial, transition and final states for the elementary reactions  $\text{COH}^* + * \rightleftharpoons \text{CO}^* + \text{H}^*$ ,  $\text{HCOH}^* + * \rightleftharpoons \text{CH}^* + \text{OH}^*$ ,  $\text{H}_2\text{COH}^* + * \rightleftharpoons \text{CH}_2^* + \text{OH}^*$  and  $\text{H}_3\text{COH}^* + * \rightleftharpoons \text{CH}_3^* + \text{OH}^*$ .

## F. Geometries of Elementary Reaction Steps

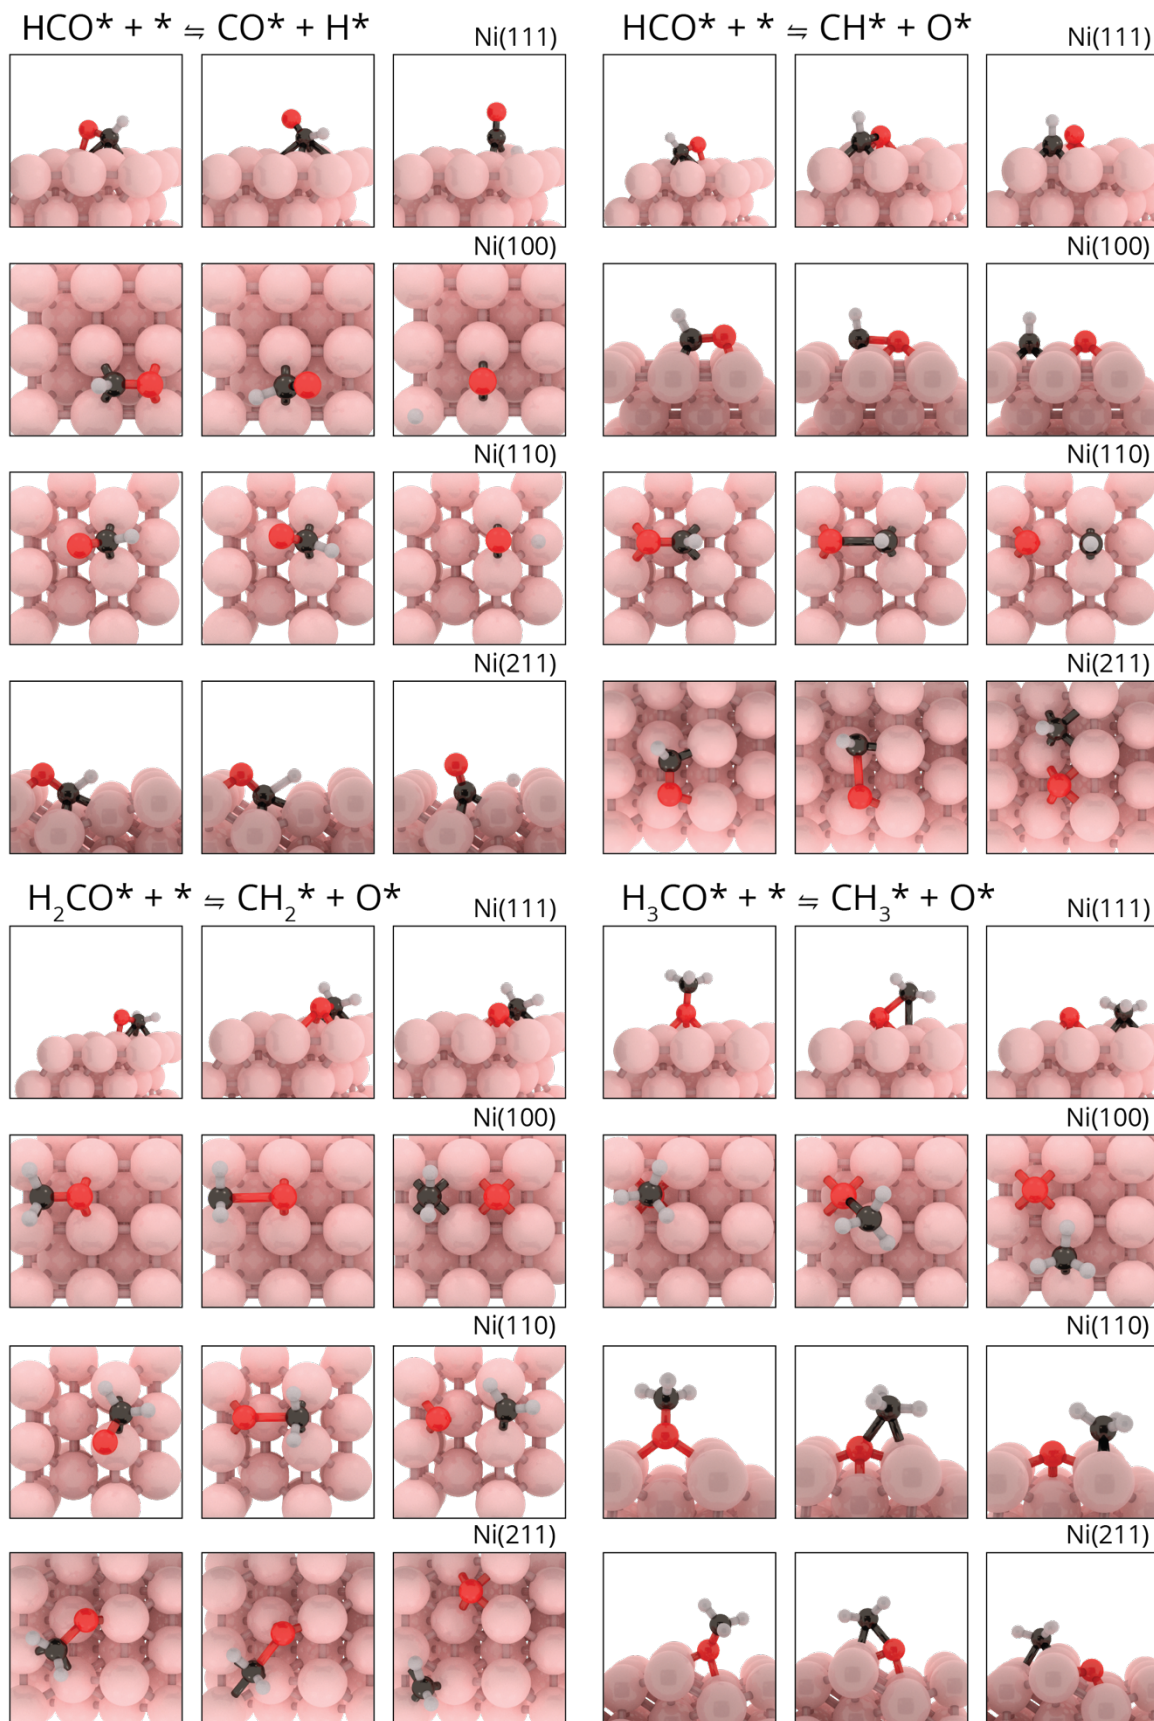

Figure S 28. Geometries of the initial, transition and final states for the elementary reactions  $\text{HCO}^* + * \rightleftharpoons \text{CO}^* + \text{H}^*$ ,  $\text{HCO}^* + * \rightleftharpoons \text{CH}^* + \text{O}^*$ ,  $\text{H}_2\text{CO}^* + * \rightleftharpoons \text{CH}_2^* + \text{O}^*$  and  $\text{H}_3\text{CO}^* + * \rightleftharpoons \text{CH}_3^* + \text{O}^*$ .



## F. Geometries of Elementary Reaction Steps

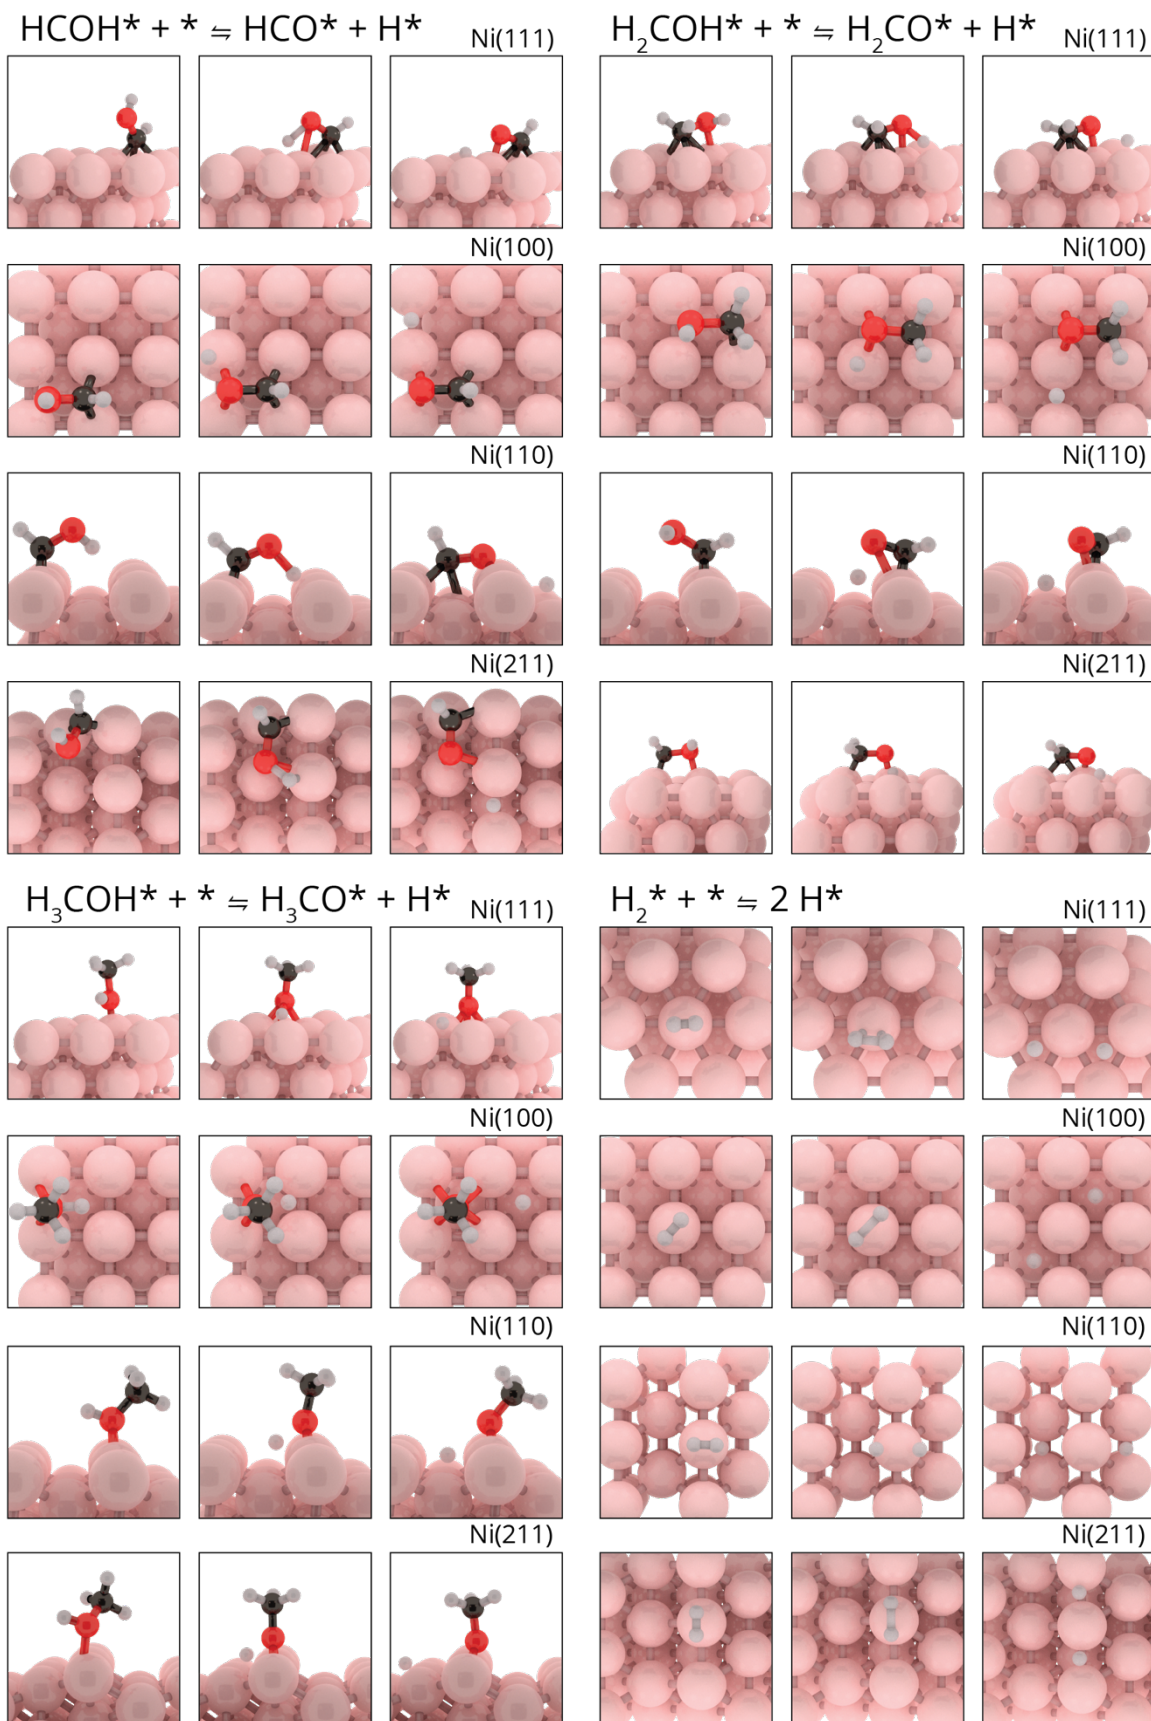

Figure S 29. Geometries of the initial, transition and final states for the elementary reactions  $\text{HCOH}^* + * \rightleftharpoons \text{HCO}^* + \text{H}^*$ ,  $\text{H}_2\text{COH}^* + * \rightleftharpoons \text{H}_2\text{CO}^* + \text{H}^*$ ,  $\text{H}_3\text{COH}^* + * \rightleftharpoons \text{H}_3\text{CO}^* + \text{H}^*$  and  $\text{H}_2^* + * \rightleftharpoons 2 \text{H}^*$ .

## F. Geometries of Elementary Reaction Steps

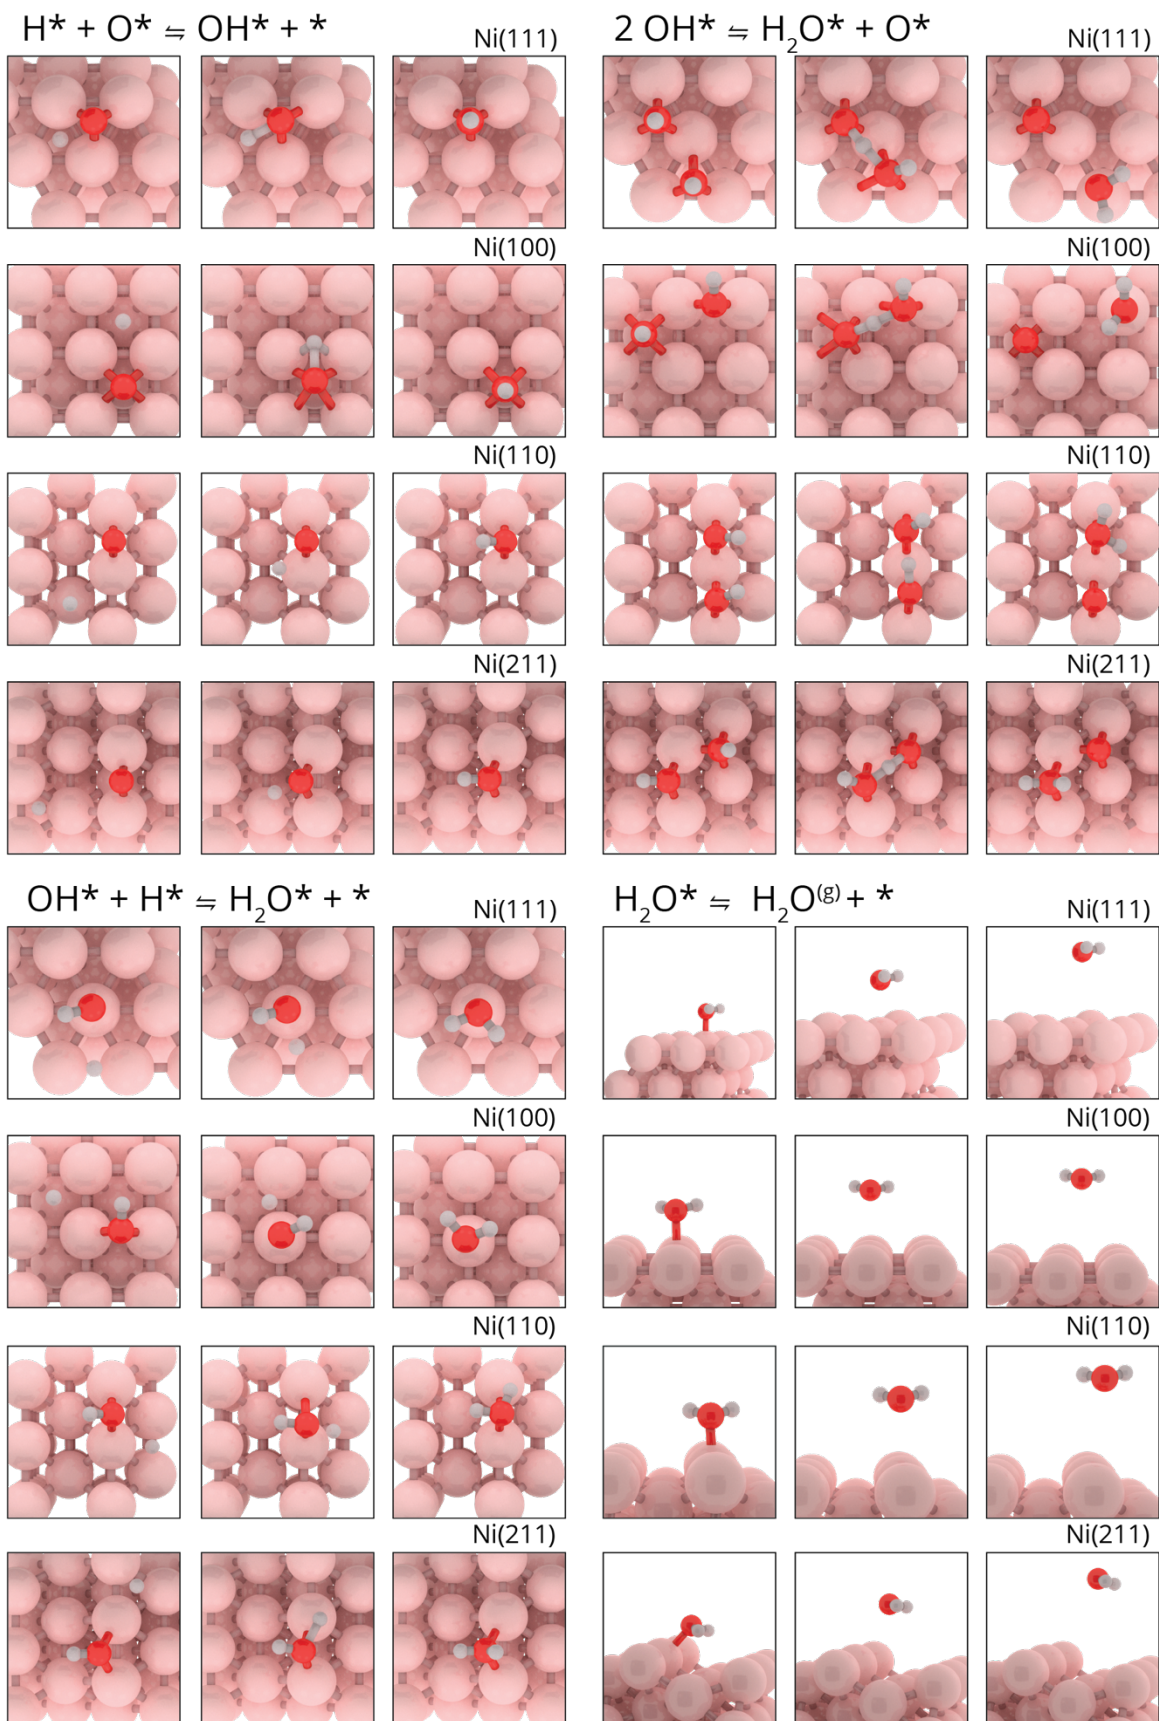

Figure S 30. Geometries of the initial, transition and final states for the elementary reactions  $H^* + O^* \rightleftharpoons OH^* + *$ ,  $2 OH^* \rightleftharpoons H_2O^* + O^*$ ,  $OH^* + H^* \rightleftharpoons H_2O^* + *$  and  $H_2O^* \rightleftharpoons H_2O^{(g)} + *$ .

## G Potential Energy Diagrams

Potential energy diagrams of the carbide-, carboxylic- and formate-pathways are given in Figure S 31 to Figure S 33. In opaque, the PED with a destabilization of 40 kJ/mol for  $\text{CO}^*$  and 20 kJ/mol for  $\text{H}^*$  intermediates. This case represents the energy landscape that has been used for the microkinetics models, as presented in the manuscript. As a comparison, a transparent line is used for the PED with zero-point-energy corrected adsorption energies and each adsorbate in their *most stable* geometries.

### PED primary reaction pathways

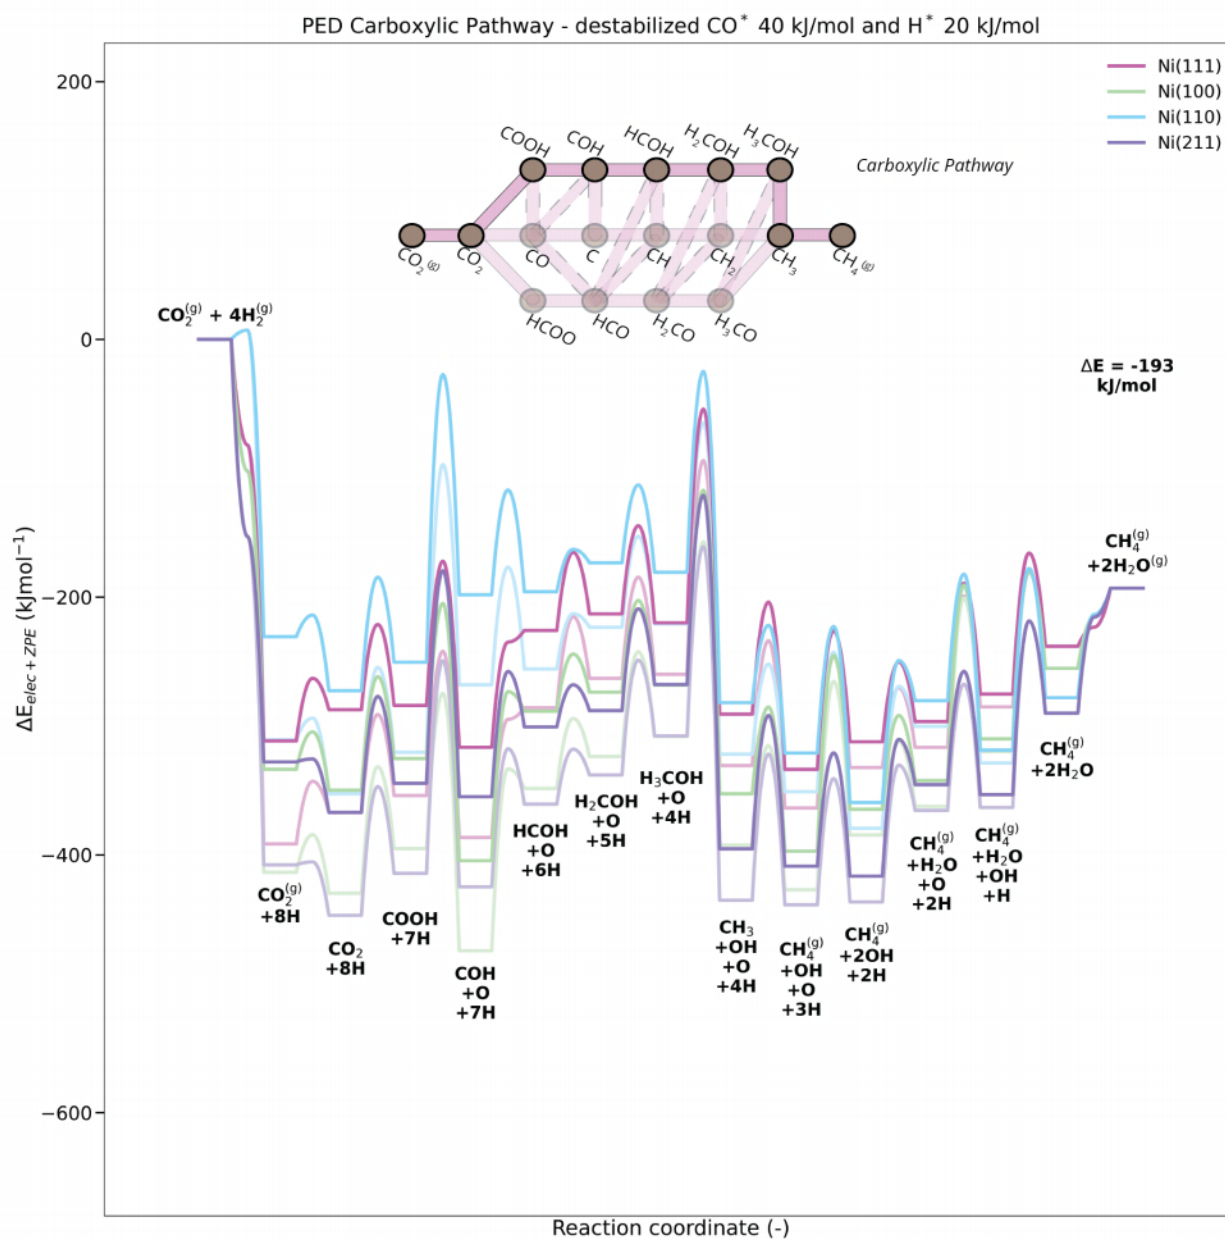

Figure S 31. Potential energy diagram (PED) of the carboxylic pathway. Opaque lines represent the PED where  $\text{CO}^*$  was destabilized with 40 kJ/mol and  $\text{H}^*$  was destabilized with 20 kJ/mol. Transparent lines represent the PED where no intermediate was destabilized.

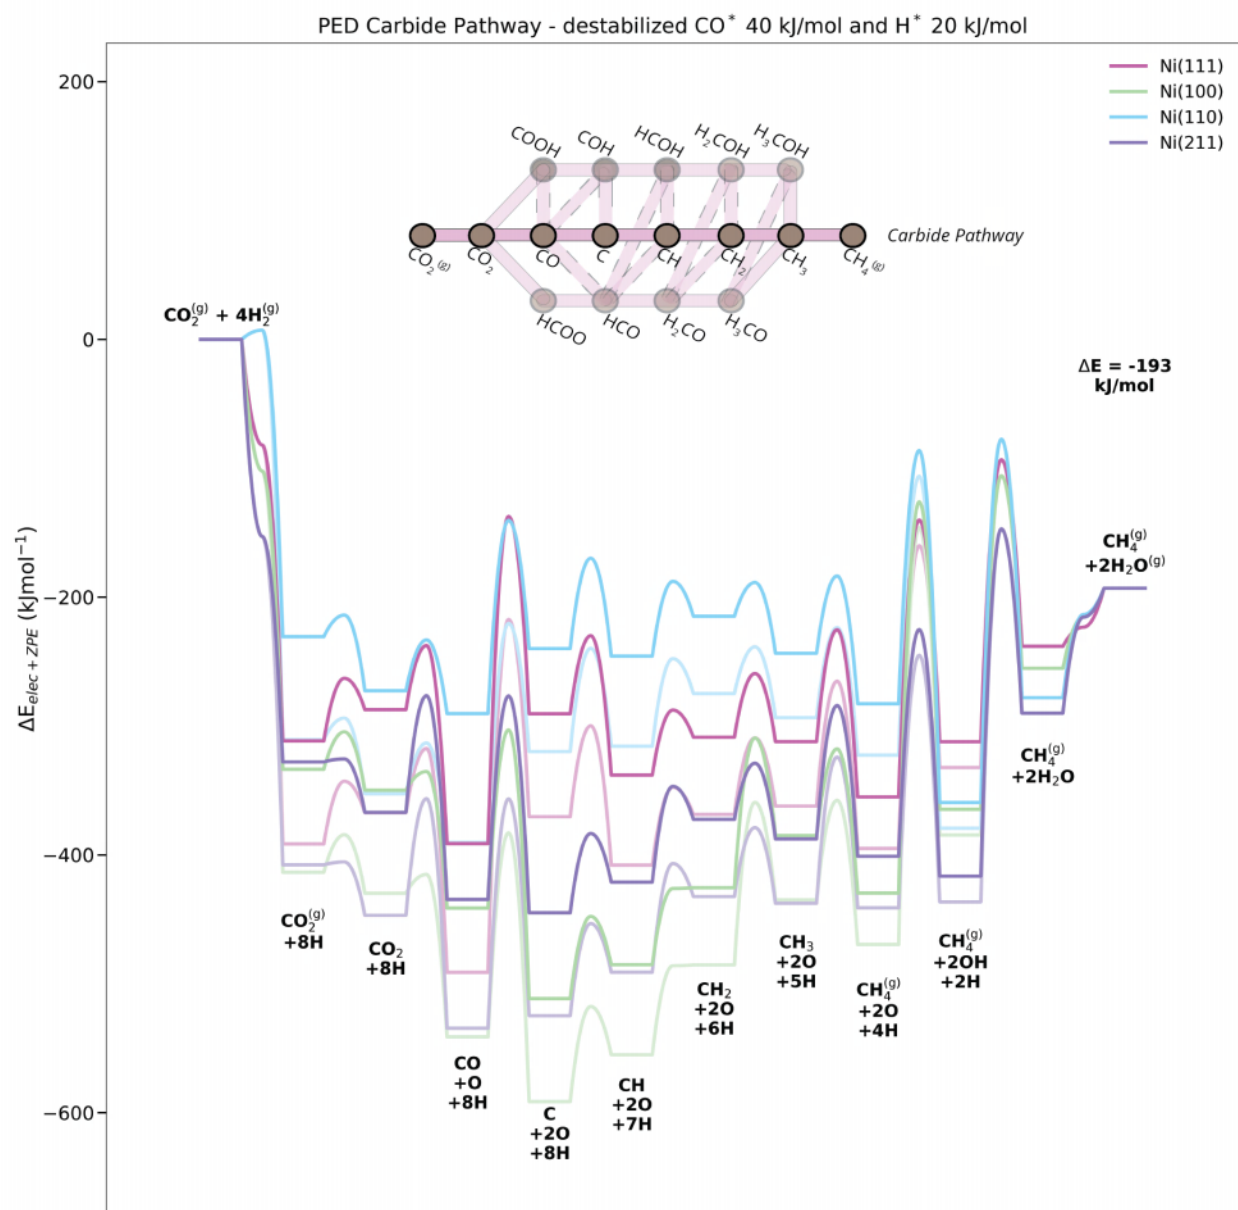

Figure S 32. Potential energy diagram (PED) of the carbide pathway. Opaque lines represent the PED where CO\* was destabilized with 40 kJ/mol and H\* was destabilized with 20 kJ/mol. Transparent lines represent the PED where no intermediate was destabilized.

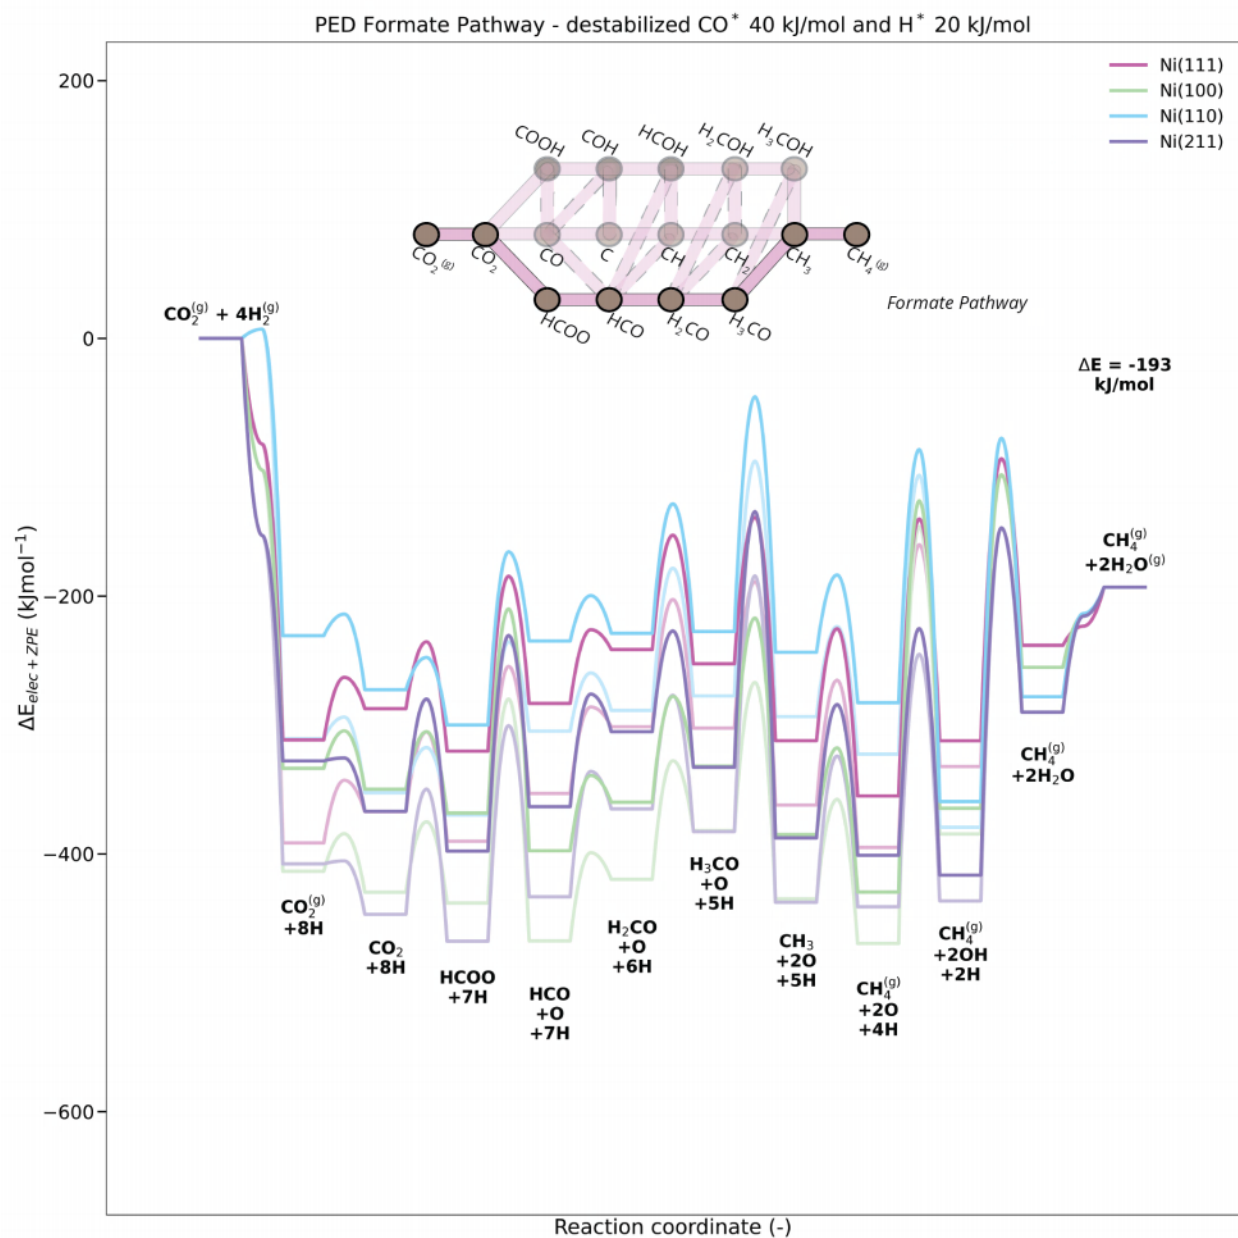

Figure S 33. Potential energy diagram (PED) of the formate pathway. Opaque lines represent the PED where  $\text{CO}^*$  was destabilized with 40 kJ/mol and  $\text{H}^*$  was destabilized with 20 kJ/mol. Transparent lines represent the PED where no intermediate was destabilized.

## G. Potential Energy Diagrams

### **PED reaction flux**

Potential energy diagrams of pathways with significant flux are plotted for each studied nickel facet, together with the corresponding flux diagram and a visualization of reaction intermediates in Figure S 34 to Figure S 43. In opaque, the PED with a destabilization of 40 kJ/mol for  $\text{CO}^*$  and 20 kJ/mol for  $\text{H}^*$  intermediate. This case represents the energy landscape that has been used for the microkinetics models as presented in the manuscript. As a comparison, a transparent line is used for the PED with zero-point-energy corrected adsorption energies with each adsorbate in their *most stable* geometries.

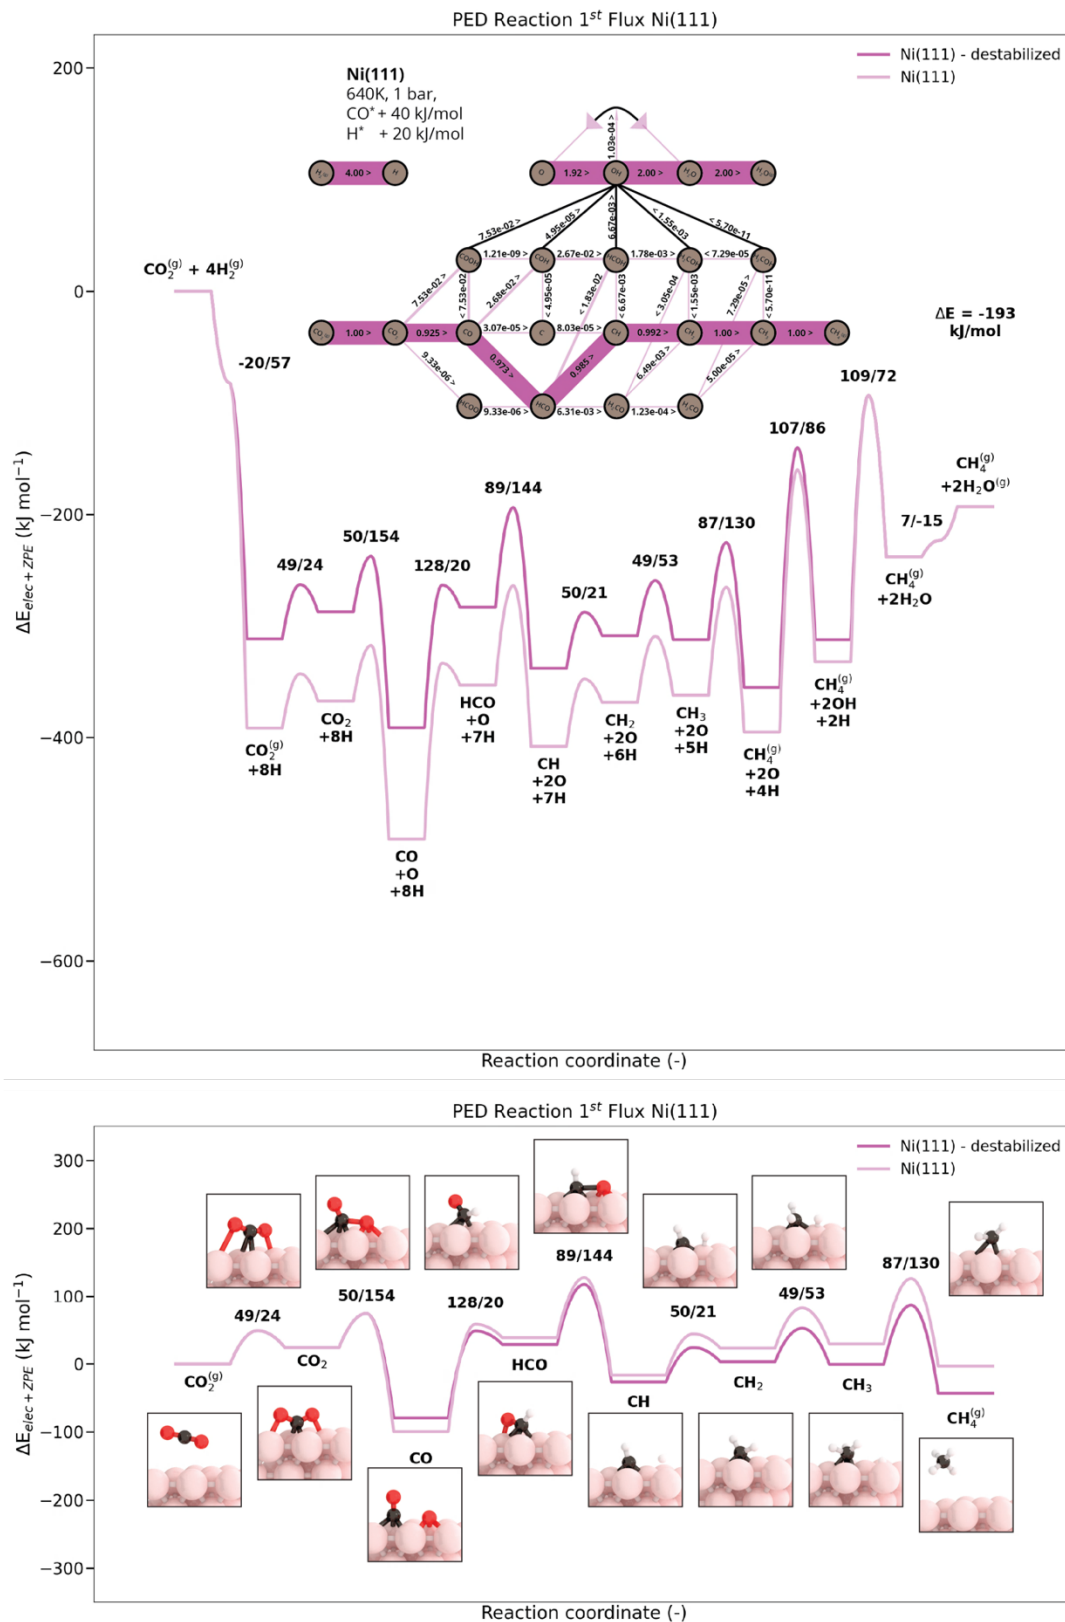

Figure S 34. Above: The complete potential energy diagram (PED) for Ni(111) corresponding to the significant flux depicted in the flux diagram. Below: PED focused on the carbonaceous part of the reaction, together with a visualization of reaction intermediates. Opaque lines represent the PED where CO\* and H\* were destabilized with 40 and 20 kJ/mol, respectively. Transparent lines represent the PED where no intermediate was destabilized.





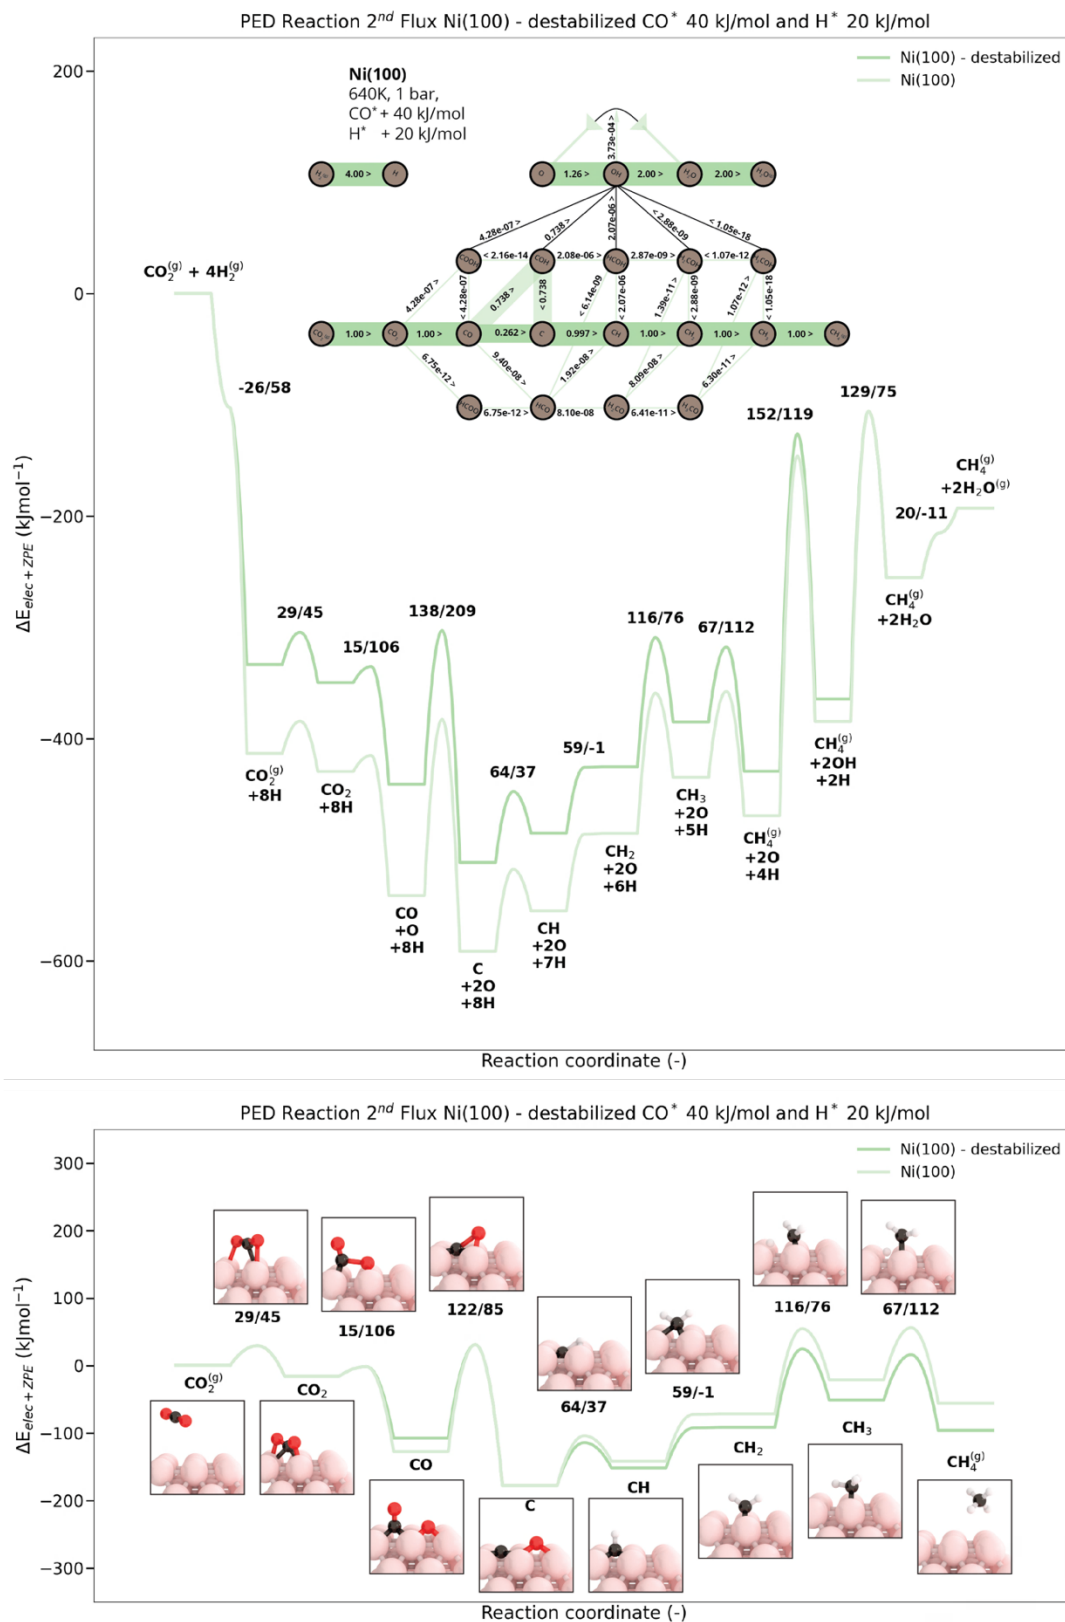

Figure S 36. Above: The complete potential energy diagram (PED) for Ni(100) corresponding to the significant flux (opaque) depicted in the flux diagram. Below: PED focused on the carbonaceous part of the reaction, together with a visualization of reaction intermediates. Opaque lines represent the PED where CO\* and H\* were destabilized with 40 and 20 kJ/mol, respectively. Transparent lines represent the PED where no intermediate was destabilized.

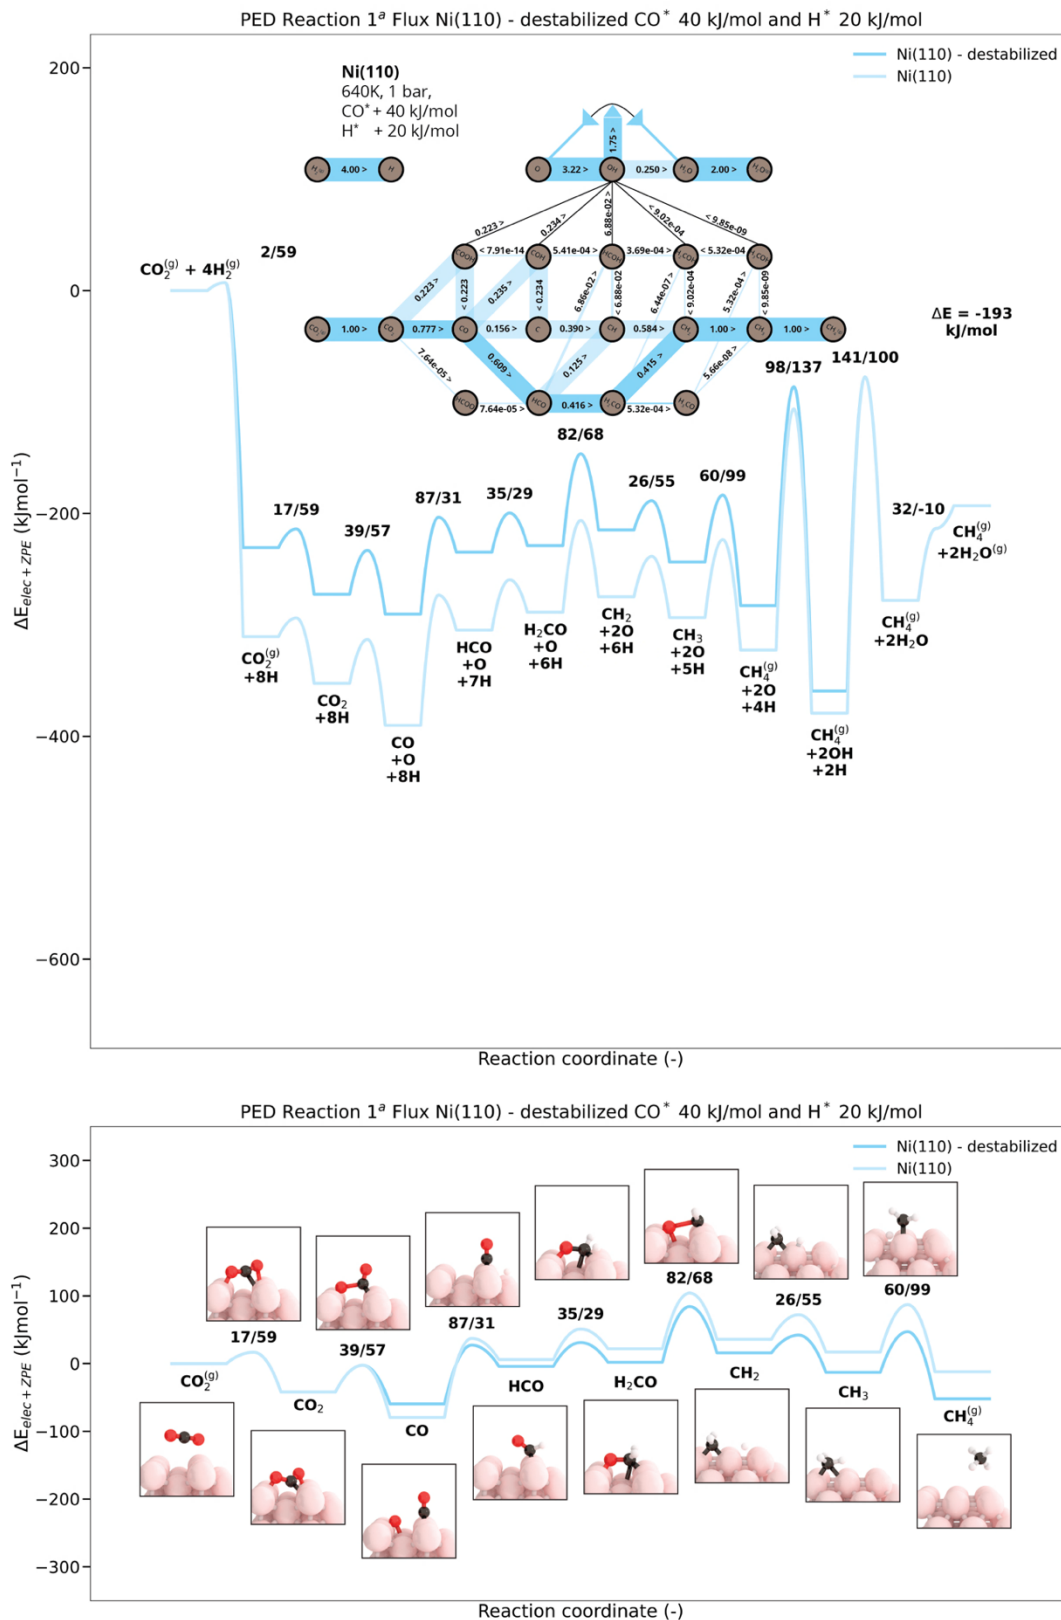

Figure S 37. Above: The complete potential energy diagram (PED) for Ni(110) corresponding to the significant flux (opaque) depicted in the flux diagram. Below: PED focused on the carbonaceous part of the reaction, together with a visualization of reaction intermediates. Opaque lines represent the PED where CO\* and H\* were destabilized with 40 and 20 kJ/mol, respectively. Transparent lines represent the PED where no intermediate was destabilized.

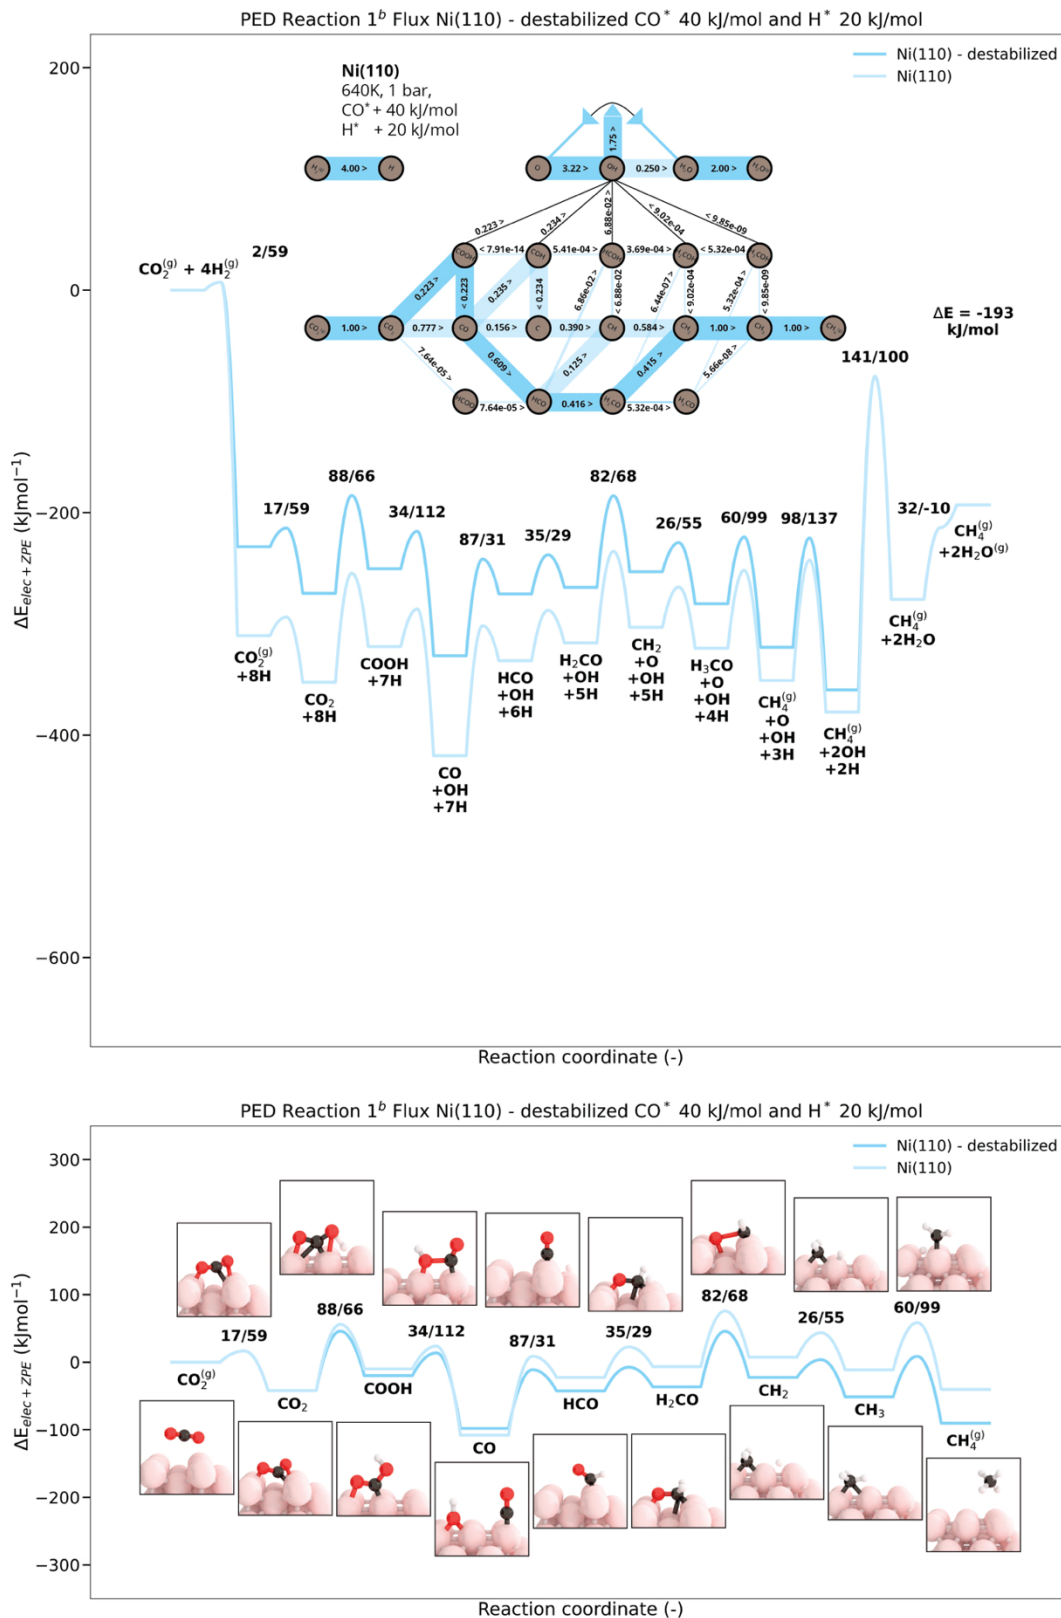

Figure S 38. Above: The complete potential energy diagram (PED) for Ni(110) corresponding to the significant flux (opaque) depicted in the flux diagram. Below: PED focused on the carbonaceous part of the reaction, together with a visualization of reaction intermediates. Opaque lines represent the PED where CO\* and H\* were destabilized with 40 and 20 kJ/mol, respectively. Transparent lines represent the PED where no intermediate was destabilized.

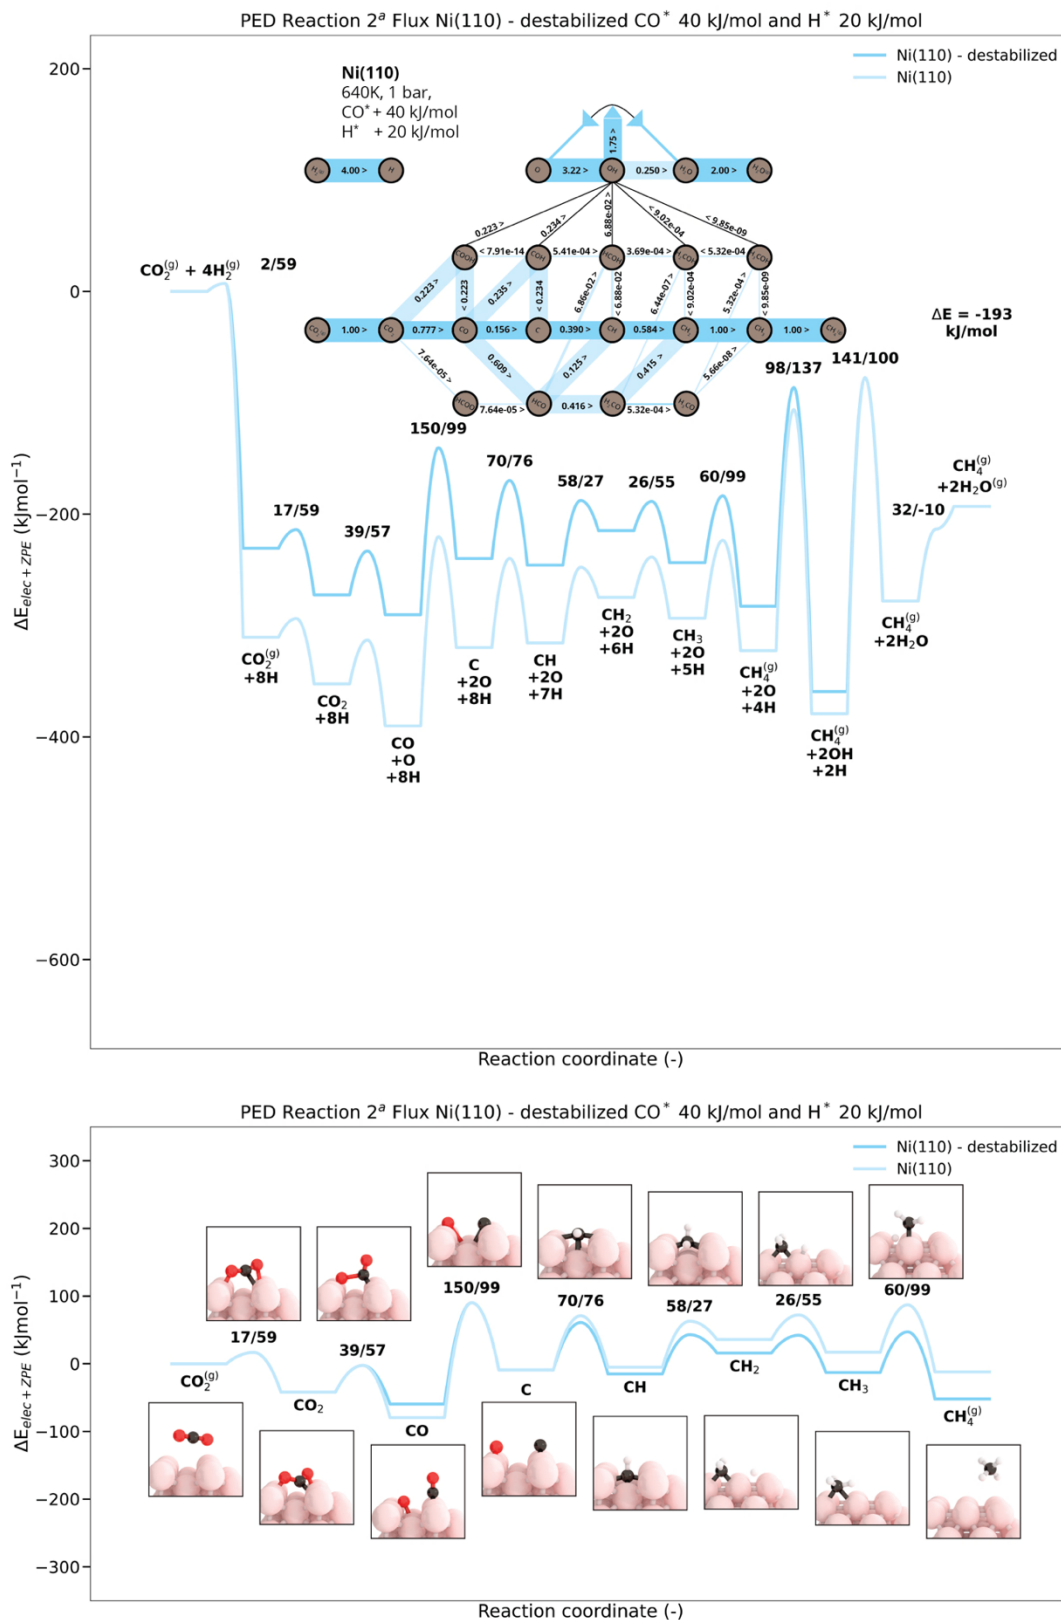

Figure S 39. Above: The complete potential energy diagram (PED) for Ni(110) corresponding to the significant flux (opaque) depicted in the flux diagram. Below: PED focused on the carbonaceous part of the reaction, together with a visualization of reaction intermediates. Opaque lines represent the PED where CO\* and H\* were destabilized with 40 and 20 kJ/mol, respectively. Transparent lines represent the PED where no intermediate was destabilized.

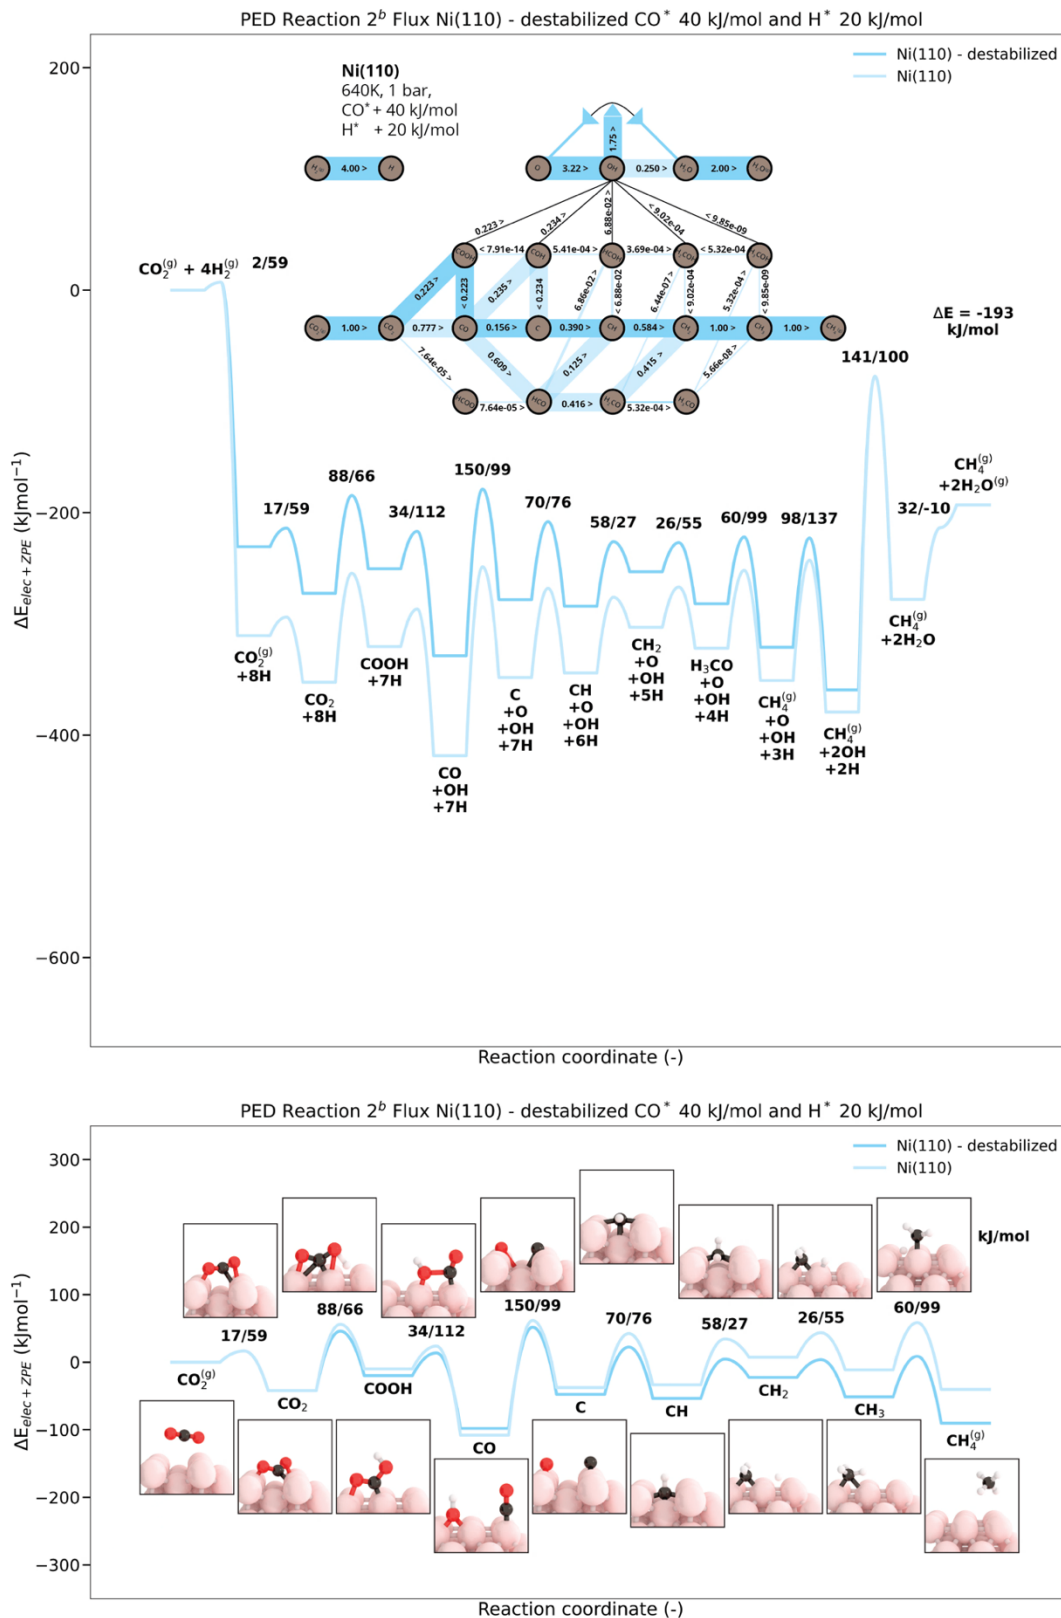

Figure S 40. Above: The complete potential energy diagram (PED) for Ni(110) corresponding to the significant flux (opaque) depicted in the flux diagram. Below: PED focused on the carbonaceous part of the reaction, together with a visualization of reaction intermediates. Opaque lines represent the PED where CO\* and H\* were destabilized with 40 and 20 kJ/mol, respectively. Transparent lines represent the PED where no intermediate was destabilized.

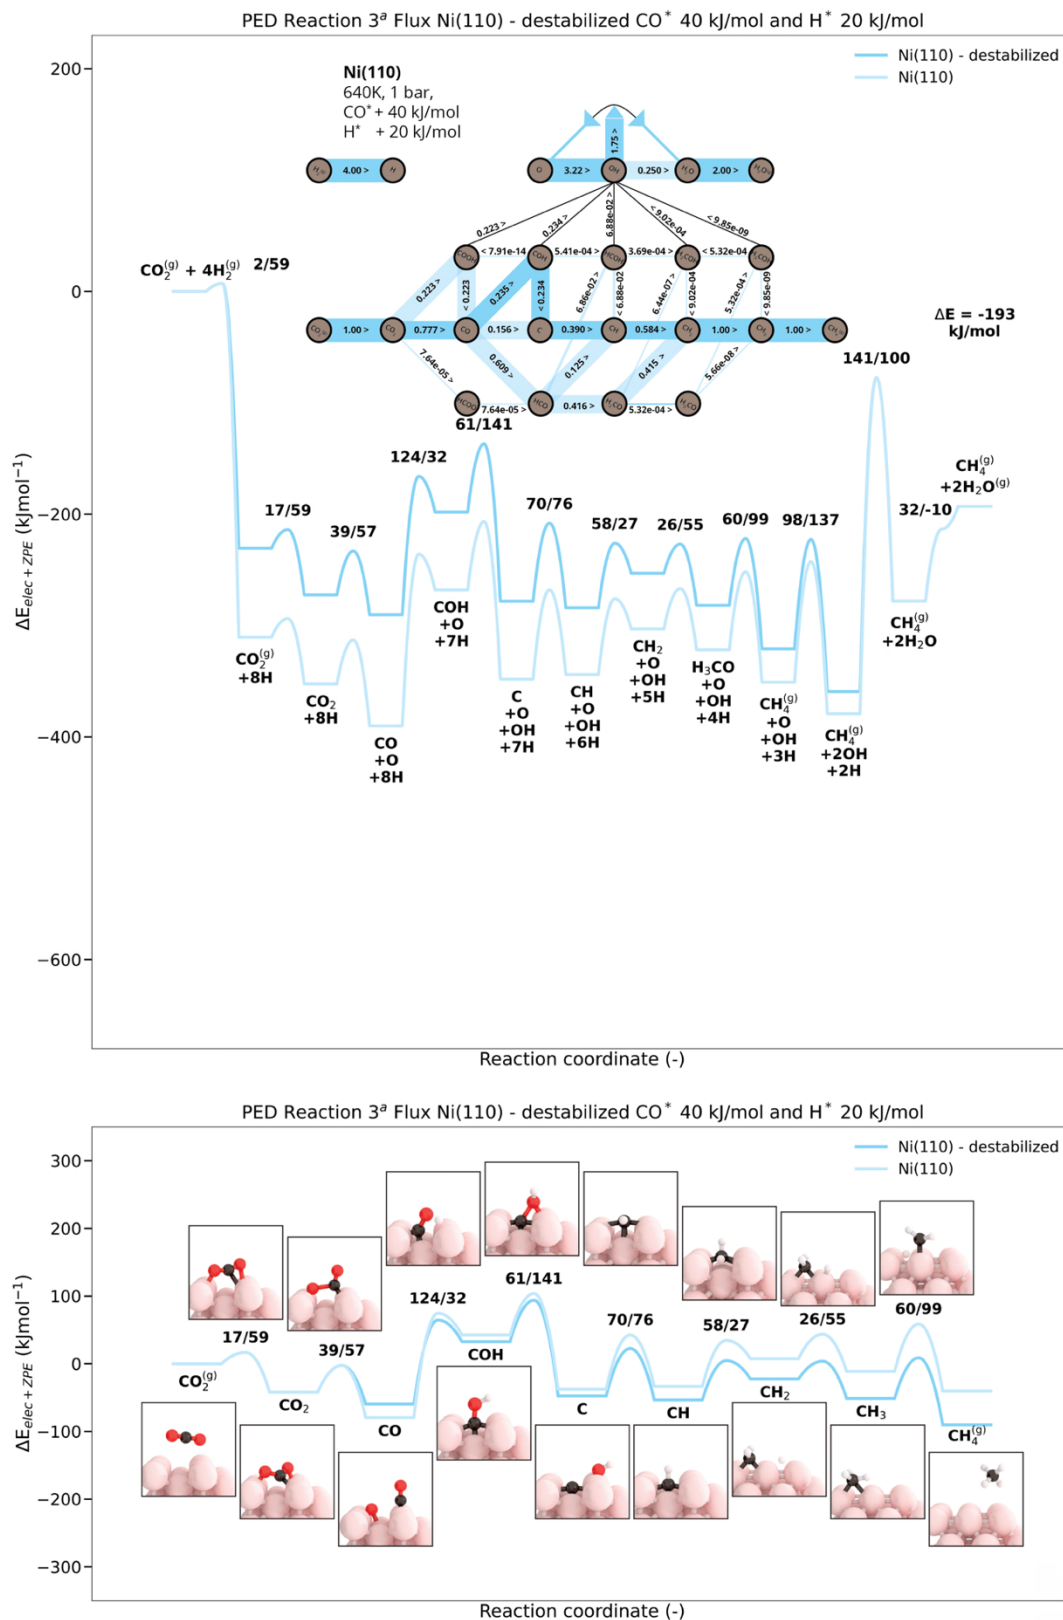

Figure S 41. Above: The complete potential energy diagram (PED) for Ni(110) corresponding to the significant flux (opaque) depicted in the flux diagram. Below: PED focused on the carbonaceous part of the reaction, together with a visualization of reaction intermediates. Opaque lines represent the PED where CO\* and H\* were destabilized with 40 and 20 kJ/mol, respectively. Transparent lines represent the PED where no intermediate was destabilized.

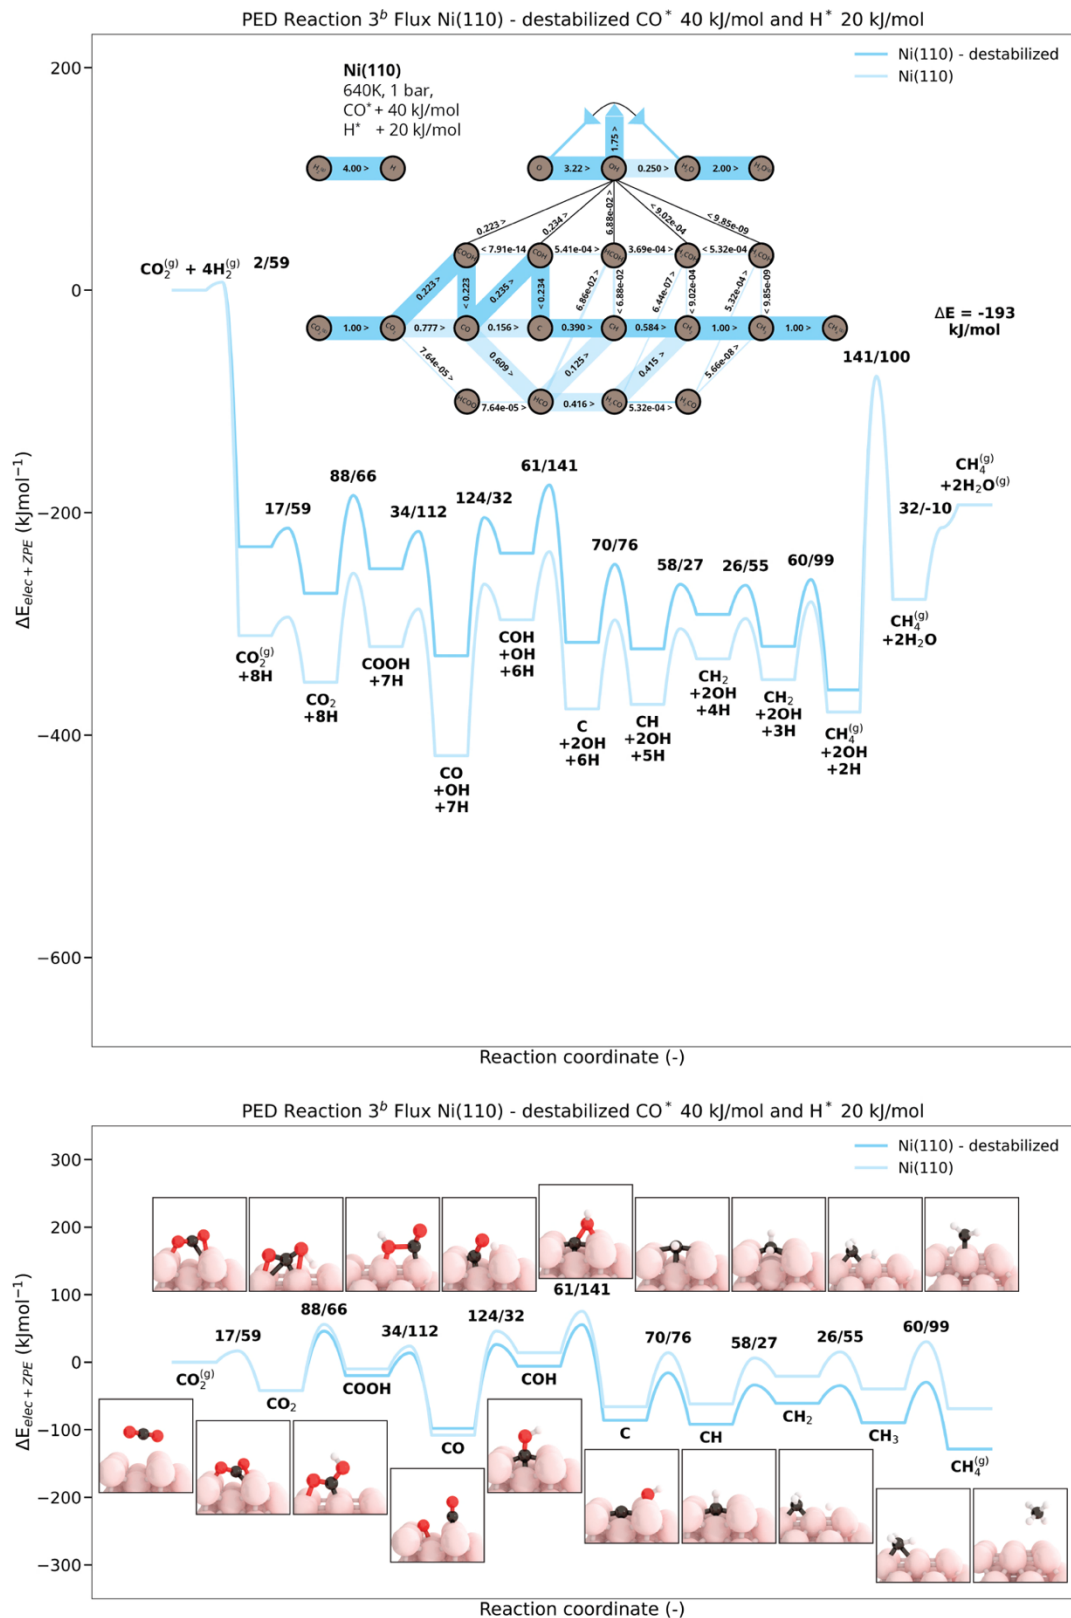

Figure S 42. Above: The complete potential energy diagram (PED) for Ni(110) corresponding to the significant flux (opaque) depicted in the flux diagram. Below: PED focused on the carbonaceous part of the reaction, together with a visualization of reaction intermediates. Opaque lines represent the PED where CO\* and H\* were destabilized with 40 and 20 kJ/mol, respectively. Transparent lines represent the PED where no intermediate was destabilized.

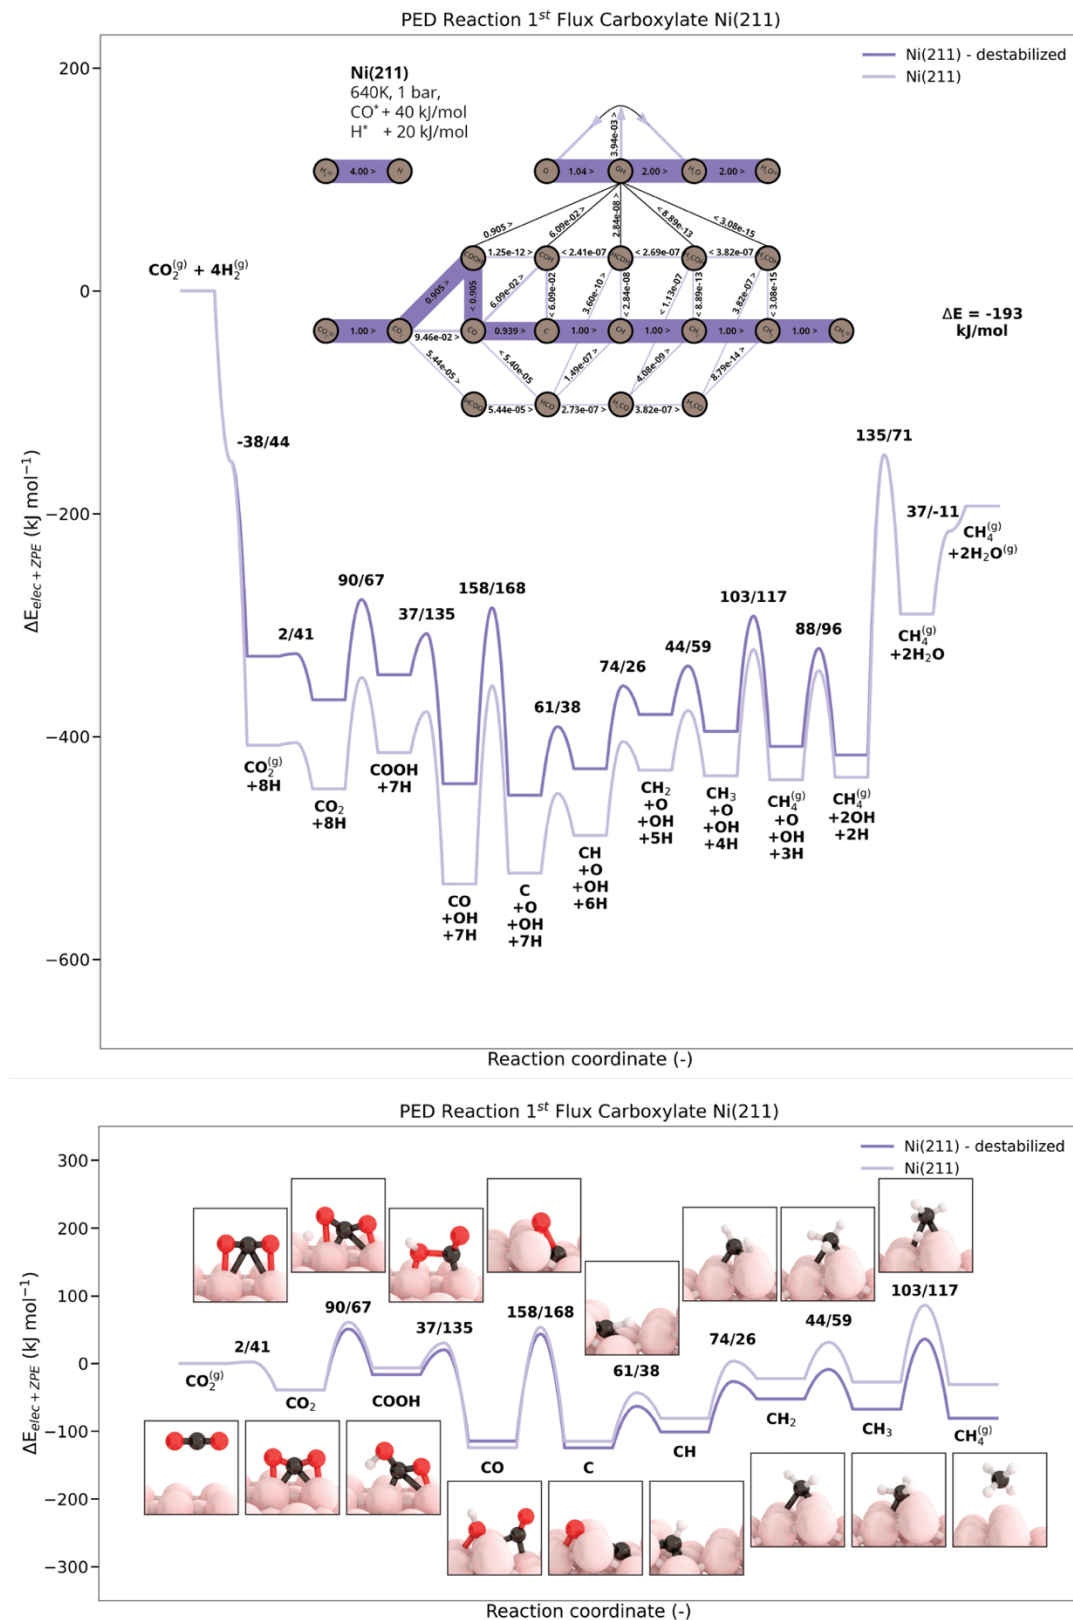

Figure S 43. Above: The complete potential energy diagram (PED) for Ni(211) corresponding to the significant flux depicted in the flux diagram. Below: PED focused on the carbonaceous part of the reaction, together with a visualization of reaction intermediates. Opaque lines represent the PED where CO\* and H\* were destabilized with 40 and 20 kJ/mol, respectively. Transparent lines represent the PED where no intermediate was destabilized.



## H Microkinetics Simulations

### Input

Input files for MKM simulations of CO<sub>2</sub> methanation over 4 nickel facets. Simulations were performed with an initial CO<sub>2</sub>:H<sub>2</sub> mixture of 1:4, a total pressure of 1 bar and temperatures between 500 - 800 K. Forward and backward activation energies and vibrational partition functions ( $\nu$ ) at 673 K are provided for elementary reactions taking place on the catalytic surface. The forward and backward activation energies are with respect to the most stable adsorption energy, except for CO\* and H\* which were destabilized with 40 and 20 kJ/mol, respectively. All vibrational partition functions are calculated using the most stable adsorption energies of each reaction intermediate.

Necessary input values for adsorption and desorption are: surface area of the adsorption site (A), mass of the reactant (m), sticking coefficient, remaining entropy of the adsorbed intermediate ( $q_{\text{vib,ads}}$ ), desorption energy ( $E_{\text{des}}$ ), thermodynamic coefficients A-H and lateral interaction potential. The thermodynamic coefficients are listed in Table S 12.

Table S 12. Thermodynamic coefficients A-H for gaseous species.

| Thermodynamic table for Shomate equation <sup>[1]</sup> |                 |                |                 |                  |
|---------------------------------------------------------|-----------------|----------------|-----------------|------------------|
| Coefficient                                             | CO <sub>2</sub> | H <sub>2</sub> | CH <sub>4</sub> | H <sub>2</sub> O |
| A                                                       | 24.99735        | 33.066178      | -0.703029       | 30.092           |
| B                                                       | 55.18696        | -11.363417     | 108.4773        | 6.832514         |
| C                                                       | -33.69137       | 11.432816      | -42.52157       | 6.793435         |
| D                                                       | 7.948387        | -2.772874      | 5.862788        | -2.53448         |
| E                                                       | -0.136638       | -0.158558      | 0.678565        | 0.082139         |
| F                                                       | -403.6075       | -9.980797      | -76.84376       | -250.881         |
| G                                                       | 228.2431        | 172.707974     | 158.7163        | 223.3967         |
| H                                                       | -393.5224       | 0              | -74.8731        | -241.8264        |

1. Chase, M.W., J. NIST-JANAF Thermochemical Tables. J. Phys. Chem. Ref. Data, Monogr. 9 1998, No. Fourth Edition, 1-1951

The lateral correction is applied on a per-atom basis i.e., the lateral interaction penalty for CO<sub>2</sub> is determined by the penalty of one carbon atom and two oxygen atoms:

$$E_{\text{lat}}^{\text{CO}_2} = E_{\text{lat}}^{\text{C}} + 2E_{\text{lat}}^{\text{O}} \quad (1)$$

Each per-atom contribution is exponentially dependent on the surface coverage according to:

$$E_{\text{lat}}^{\text{x}} = E_{\theta=1}^{\text{x}} \times (101^{\theta_{\text{lat}}} - 1)/100 \quad (2)$$

where  $E_{\theta=1}^{\text{x}}$  is the lateral penalty for  $\theta_{\text{lat}} = 1$ . For  $\theta_{\text{lat}} = 0$ , the lateral penalty will be zero. Values of  $\theta_{\text{lat}} > 1$  are allowed and will result in exponentially increasing lateral penalties. Equation 2 is

the mathematical form of “SIMPLELAT” (Table S 13). The lateral interactions were assumed to be surface independent. For a more in-depth explanation of the lateral interaction potential, the reader is referred to literature<sup>6</sup>. Necessary input for the lateral interaction potential is listed in Table S 13.

Input values of the microkinetics simulations for each studied nickel facet are given in Table S 14 to Table S 21.

Table S 13. Snippets of the MKMCXX input file corresponding to the lateral interaction potential

|                                                                  | SIMPLELAT       | DIR | LB   | UB   | LCOV | EXCLUDE |
|------------------------------------------------------------------|-----------------|-----|------|------|------|---------|
| $\text{CO}_2 + * \rightleftharpoons \text{CO}_2^*$               | [1*\$LC+2*\$LO] | 0   | 0.25 | 0.75 | 1    | *,0.5H* |
| $\text{H}_2 + 2* \rightleftharpoons 2\text{H}^*$                 | [2*\$LH]        | 0   | 0.25 | 0.75 | 1    | *,0.5H* |
| $\text{CH}_4 + 2* \rightleftharpoons \text{CH}_3^* + \text{H}^*$ | [1*\$LC+4*\$LH] | 0   | 0.25 | 0.75 | 1    | *,0.5H* |
| $\text{H}_2\text{O} + * \rightleftharpoons \text{H}_2\text{O}^*$ | [2*\$LH+1*\$LO] | 0   | 0.25 | 0.75 | 1    | *,0.5H* |

```

& regex_rules_start
REGEX_VAR = $LC; 60e3
REGEX_VAR = $LO; 60e3
REGEX_VAR = $LH; 15e3
& regex_rules_end

```

<sup>6</sup> Zijlstra, B.; Broos, R. J. P.; Chen, W.; Filot, I. A. W.; Hensen, E. J. M. First-Principles Based Microkinetic Modeling of Transient Kinetics of CO Hydrogenation on Cobalt Catalysts. *Catal. Today* **2020**, 342 (October 2018), 131–141. <https://doi.org/10.1016/j.cattod.2019.03.002>.

Table S 14. Input values of surface reactions for microkinetics simulations on Ni(111).

| Ni(111)                                                                             |            |             |                       |                        |
|-------------------------------------------------------------------------------------|------------|-------------|-----------------------|------------------------|
| Elementary reaction                                                                 | $\nu$ forw | $\nu$ backw | $E_{\text{act forw}}$ | $E_{\text{act backw}}$ |
| $\text{CO}_2^* + * \rightleftharpoons \text{CO}^* + \text{O}^*$                     | 4.98E+12   | 1.85E+13    | 4.98E+04              | 1.54E+05               |
| $\text{CO}^* + * \rightleftharpoons \text{C}^* + \text{O}^*$                        | 1.54E+12   | 1.39E+13    | 2.54E+05              | 1.53E+05               |
| $\text{C}^* + \text{H}^* \rightleftharpoons \text{CH}^* + *$                        | 2.44E+13   | 1.70E+13    | 6.05E+04              | 1.08E+05               |
| $\text{CH}^* + \text{H}^* \rightleftharpoons \text{CH}_2^* + *$                     | 8.81E+12   | 3.90E+12    | 5.04E+04              | 2.10E+04               |
| $\text{CH}_2^* + \text{H}^* \rightleftharpoons \text{CH}_3^* + *$                   | 2.83E+13   | 1.45E+13    | 4.94E+04              | 5.29E+04               |
| $\text{CO}_2^* + \text{H}^* \rightleftharpoons \text{COOH}^* + *$                   | 1.71E+13   | 2.02E+13    | 6.61E+04              | 6.29E+04               |
| $\text{COOH}^* + * \rightleftharpoons \text{COH}^* + \text{O}^*$                    | 4.60E+12   | 9.07E+12    | 1.12E+05              | 1.44E+05               |
| $\text{COH}^* + \text{H}^* \rightleftharpoons \text{HCOH}^* + *$                    | 1.47E+13   | 6.19E+12    | 8.17E+04              | -8.99E+03              |
| $\text{HCOH}^* + \text{H}^* \rightleftharpoons \text{H}_2\text{COH}^*$              | 2.76E+13   | 5.08E+13    | 6.06E+04              | 4.78E+04               |
| $\text{H}_2\text{COH}^* + \text{H}^* \rightleftharpoons \text{H}_3\text{COH}^* + *$ | 1.01E+13   | 3.96E+11    | 6.85E+04              | 7.53E+04               |
| $\text{CO}_2^* + \text{H}^* \rightleftharpoons \text{HCOO}^* + *$                   | 5.53E+12   | 9.16E+12    | 5.19E+04              | 8.49E+04               |
| $\text{HCOO}^* + * \rightleftharpoons \text{HCO}^* + \text{O}^*$                    | 3.60E+12   | 1.09E+13    | 1.36E+05              | 9.87E+04               |
| $\text{HCO}^* + \text{H}^* \rightleftharpoons \text{H}_2\text{CO}^* + *$            | 1.30E+13   | 5.85E+12    | 5.72E+04              | 1.54E+04               |
| $\text{H}_2\text{CO}^* + \text{H}^* \rightleftharpoons \text{H}_3\text{CO}^* + *$   | 8.36E+12   | 4.25E+12    | 8.87E+04              | 9.97E+04               |
| $\text{COOH}^* + * \rightleftharpoons \text{CO}^* + \text{OH}^*$                    | 2.22E+13   | 2.42E+13    | 2.89E+04              | 1.15E+05               |
| $\text{COH}^* + * \rightleftharpoons \text{CO}^* + \text{H}^*$                      | 4.26E+12   | 6.80E+12    | 7.63E+04              | 1.51E+05               |
| $\text{COH}^* + * \rightleftharpoons \text{C}^* + \text{OH}^*$                      | 3.49E+12   | 1.74E+13    | 1.80E+05              | 1.32E+05               |
| $\text{HCOH}^* + * \rightleftharpoons \text{CH}^* + \text{OH}^*$                    | 2.62E+12   | 2.17E+13    | 6.27E+04              | 1.53E+05               |
| $\text{H}_2\text{COH}^* + * \rightleftharpoons \text{CH}_2^* + \text{OH}^*$         | 7.87E+12   | 1.57E+13    | 5.65E+04              | 1.31E+05               |
| $\text{H}_3\text{COH}^* + * \rightleftharpoons \text{CH}_3^* + \text{OH}^*$         | 3.19E+12   | 8.38E+13    | 1.66E+05              | 2.37E+05               |
| $\text{HCO}^* + * \rightleftharpoons \text{CH}^* + \text{O}^*$                      | 3.10E+12   | 1.43E+13    | 8.92E+04              | 1.44E+05               |
| $\text{HCO}^* + * \rightleftharpoons \text{CO}^* + \text{H}^*$                      | 6.43E+12   | 4.75E+12    | 1.99E+04              | 1.28E+05               |
| $\text{H}_2\text{CO}^* + * \rightleftharpoons \text{CH}_2^* + \text{O}^*$           | 2.22E+12   | 1.02E+13    | 7.30E+04              | 1.40E+05               |
| $\text{H}_3\text{CO}^* + * \rightleftharpoons \text{CH}_3^* + \text{O}^*$           | 5.93E+12   | 2.75E+13    | 1.14E+05              | 1.73E+05               |
| $\text{HCO}^* + \text{H}^* \rightleftharpoons \text{HCOH}^* + *$                    | 2.45E+13   | 4.75E+12    | 1.04E+05              | 4.63E+04               |
| $\text{H}_2\text{CO}^* + \text{H}^* \rightleftharpoons \text{H}_2\text{COH}^*$      | 1.03E+13   | 8.21E+12    | 6.60E+04              | 3.75E+04               |
| $\text{H}_3\text{CO}^* + \text{H}^* \rightleftharpoons \text{H}_3\text{COH}^*$      | 2.22E+13   | 1.36E+12    | 1.01E+05              | 6.88E+04               |
| $\text{H}^* + \text{O}^* \rightleftharpoons \text{OH}^* + *$                        | 2.81E+13   | 9.77E+12    | 1.07E+05              | 8.60E+04               |
| $\text{OH}^* + \text{H}^* \rightleftharpoons \text{H}_2\text{O}^* + *$              | 1.45E+13   | 3.18E+11    | 1.09E+05              | 7.24E+04               |
| $\text{OH}^* + \text{OH}^* \rightleftharpoons \text{H}_2\text{O}^* + \text{O}^*$    | 1.32E+13   | 8.36E+11    | 6.18E+04              | 4.62E+04               |

Table S 15. Input values of adsorption and desorption reactions for microkinetics simulations on Ni(111). For A-H and Lat. see Table S 12 and Table S 13, respectively.

| Ni(111)                                                          |      |     |                     |          |               |                      |                          |
|------------------------------------------------------------------|------|-----|---------------------|----------|---------------|----------------------|--------------------------|
| Elementary reaction                                              | Lat. | A-H | A (m <sup>2</sup> ) | m (a.u.) | Stick. Coëff. | Q <sub>vib</sub> (-) | E <sub>des</sub> (J/mol) |
| $\text{CO}_2 + * \rightleftharpoons \text{CO}_2^*$               | ...  | ... | 2.68E-20            | 44       | 0.01          | 9.729                | -2.44E+04                |
| $\text{H}_2 + 2* \rightleftharpoons 2\text{H}^*$                 | ...  | ... | 5.37E-20            | 2        | 0.05          | 2.353                | 7.74E+04                 |
| $\text{CH}_4 + 2* \rightleftharpoons \text{CH}_3^* + \text{H}^*$ | ...  | ... | 5.37E-20            | 16       | 1E-10         | 104.150              | -9.69E+04                |
| $\text{H}_2\text{O} + * \rightleftharpoons \text{H}_2\text{O}^*$ | ...  | ... | 2.68E-20            | 18       | 0.85          | 2.654                | 7.42E+03                 |

Table S 16. Input values of surface reactions for microkinetics simulations on Ni(100).

| Ni(100)                                                                             |            |             |                |                 |
|-------------------------------------------------------------------------------------|------------|-------------|----------------|-----------------|
| Elementary reaction                                                                 | $\nu$ forw | $\nu$ backw | $E_{act}$ forw | $E_{act}$ backw |
| $\text{CO}_2^* + * \rightleftharpoons \text{CO}^* + \text{O}^*$                     | 2.67E+13   | 3.81E+12    | 1.46E+04       | 1.06E+05        |
| $\text{CO}^* + * \rightleftharpoons \text{C}^* + \text{O}^*$                        | 9.03E+11   | 6.58E+12    | 1.38E+05       | 2.09E+05        |
| $\text{C}^* + \text{H}^* \rightleftharpoons \text{CH}^* + *$                        | 6.82E+12   | 8.48E+12    | 6.38E+04       | 3.75E+04        |
| $\text{CH}^* + \text{H}^* \rightleftharpoons \text{CH}_2^* + *$                     | 6.20E+12   | 7.46E+12    | 5.91E+04       | -6.34E+02       |
| $\text{CH}_2^* + \text{H}^* \rightleftharpoons \text{CH}_3^* + *$                   | 9.59E+12   | 2.43E+12    | 1.16E+05       | 7.58E+04        |
| $\text{CO}_2^* + \text{H}^* \rightleftharpoons \text{COOH}^* + *$                   | 9.89E+13   | 1.75E+13    | 8.81E+04       | 6.35E+04        |
| $\text{COOH}^* + * \rightleftharpoons \text{COH}^* + \text{O}^*$                    | 2.91E+12   | 3.78E+12    | 1.20E+05       | 2.00E+05        |
| $\text{COH}^* + \text{H}^* \rightleftharpoons \text{HCOH}^* + *$                    | 5.77E+11   | 4.39E+11    | 1.31E+05       | 1.52E+04        |
| $\text{HCOH}^* + \text{H}^* \rightleftharpoons \text{H}_2\text{COH}^*$              | 5.73E+12   | 9.29E+12    | 4.44E+04       | 2.96E+04        |
| $\text{H}_2\text{COH}^* + \text{H}^* \rightleftharpoons \text{H}_3\text{COH}^* + *$ | 3.06E+12   | 1.72E+11    | 7.12E+04       | 6.57E+04        |
| $\text{CO}_2^* + \text{H}^* \rightleftharpoons \text{HCOO}^* + *$                   | 4.89E+12   | 9.45E+11    | 4.47E+04       | 6.31E+04        |
| $\text{HCOO}^* + * \rightleftharpoons \text{HCO}^* + \text{O}^*$                    | 4.83E+12   | 3.45E+13    | 1.58E+05       | 1.88E+05        |
| $\text{HCO}^* + \text{H}^* \rightleftharpoons \text{H}_2\text{CO}^* + *$            | 7.86E+12   | 8.66E+12    | 5.84E+04       | 2.07E+04        |
| $\text{H}_2\text{CO}^* + \text{H}^* \rightleftharpoons \text{H}_3\text{CO}^* + *$   | 1.40E+13   | 4.20E+11    | 8.21E+04       | 5.41E+04        |
| $\text{COOH}^* + * \rightleftharpoons \text{CO}^* + \text{OH}^*$                    | 3.86E+13   | 1.58E+13    | 3.00E+04       | 1.14E+05        |
| $\text{COH}^* + * \rightleftharpoons \text{CO}^* + \text{H}^*$                      | 8.25E+12   | 5.13E+12    | 8.51E+04       | 1.22E+05        |
| $\text{COH}^* + * \rightleftharpoons \text{C}^* + \text{OH}^*$                      | 3.71E+12   | 8.55E+12    | 8.77E+04       | 1.62E+05        |
| $\text{HCOH}^* + * \rightleftharpoons \text{CH}^* + \text{OH}^*$                    | 1.28E+12   | 4.83E+12    | 1.99E+04       | 1.84E+05        |
| $\text{H}_2\text{COH}^* + * \rightleftharpoons \text{CH}_2^* + \text{OH}^*$         | 1.23E+12   | 3.45E+12    | 2.40E+04       | 1.43E+05        |
| $\text{H}_3\text{COH}^* + * \rightleftharpoons \text{CH}_3^* + \text{OH}^*$         | 1.37E+12   | 1.72E+13    | 1.51E+05       | 2.35E+05        |
| $\text{HCO}^* + * \rightleftharpoons \text{CH}^* + \text{O}^*$                      | 6.36E+12   | 5.94E+12    | 1.62E+05       | 2.50E+05        |
| $\text{HCO}^* + * \rightleftharpoons \text{CO}^* + \text{H}^*$                      | 1.41E+13   | 1.45E+12    | 6.83E+04       | 1.12E+05        |
| $\text{H}_2\text{CO}^* + * \rightleftharpoons \text{CH}_2^* + \text{O}^*$           | 1.51E+13   | 1.54E+13    | 1.09E+05       | 1.74E+05        |
| $\text{H}_3\text{CO}^* + * \rightleftharpoons \text{CH}_3^* + \text{O}^*$           | 1.61E+12   | 1.38E+13    | 1.15E+05       | 1.68E+05        |
| $\text{HCO}^* + \text{H}^* \rightleftharpoons \text{HCOH}^* + *$                    | 1.44E+13   | 1.82E+12    | 1.52E+05       | 4.29E+04        |
| $\text{H}_2\text{CO}^* + \text{H}^* \rightleftharpoons \text{H}_2\text{COH}^*$      | 2.64E+13   | 4.89E+12    | 1.37E+05       | 5.09E+04        |
| $\text{H}_3\text{CO}^* + \text{H}^* \rightleftharpoons \text{H}_3\text{COH}^*$      | 5.36E+12   | 1.86E+12    | 9.95E+04       | 3.58E+04        |
| $\text{H}^* + \text{O}^* \rightleftharpoons \text{OH}^* + *$                        | 2.45E+12   | 1.25E+12    | 1.52E+05       | 1.19E+05        |
| $\text{OH}^* + \text{H}^* \rightleftharpoons \text{H}_2\text{O}^* + *$              | 2.69E+13   | 7.12E+11    | 1.29E+05       | 7.47E+04        |
| $\text{OH}^* + \text{OH}^* \rightleftharpoons \text{H}_2\text{O}^* + \text{O}^*$    | 8.42E+11   | 4.38E+10    | 7.28E+04       | 5.06E+04        |

Table S 17. Input values of adsorption and desorption reactions for microkinetics simulations on Ni(100). For A-H and Lat. see Table S 12 and Table S 13, respectively.

| Ni(100)                                                          |      |     |                     |          |               |                      |                          |
|------------------------------------------------------------------|------|-----|---------------------|----------|---------------|----------------------|--------------------------|
| Elementary reaction                                              | Lat. | A-H | A (m <sup>2</sup> ) | m (a.u.) | Stick. Coëff. | Q <sub>vib</sub> (-) | E <sub>des</sub> (J/mol) |
| $\text{CO}_2 + * \rightleftharpoons \text{CO}_2^*$               | ...  | ... | 6.20E-20            | 44       | 4.00E-04      | 12.754               | 4.54E+04                 |
| $\text{H}_2 + 2* \rightleftharpoons 2\text{H}^*$                 | ...  | ... | 1.24E-19            | 2        | 0.5           | 6.699                | 7.78E+04                 |
| $\text{CH}_4 + 2* \rightleftharpoons \text{CH}_3^* + \text{H}^*$ | ...  | ... | 1.24E-19            | 16       | 5.00E-09      | 27.545               | -7.73E+04                |
| $\text{H}_2\text{O} + * \rightleftharpoons \text{H}_2\text{O}^*$ | ...  | ... | 6.20E-20            | 18       | 0.68          | 6.617                | 2.00E+04                 |

Table S 18. Input values of surface reactions for microkinetics simulations on Ni(110).

| Ni(110)                                                                             |            |             |                       |                        |
|-------------------------------------------------------------------------------------|------------|-------------|-----------------------|------------------------|
| Elementary reaction                                                                 | $\nu$ forw | $\nu$ backw | $E_{\text{act forw}}$ | $E_{\text{act backw}}$ |
| $\text{CO}_2^* + * \rightleftharpoons \text{CO}^* + \text{O}^*$                     | 1.02E+13   | 5.09E+12    | 3.94E+04              | 5.71E+04               |
| $\text{CO}^* + * \rightleftharpoons \text{C}^* + \text{O}^*$                        | 5.81E+11   | 9.48E+12    | 1.50E+05              | 9.95E+04               |
| $\text{C}^* + \text{H}^* \rightleftharpoons \text{CH}^* + *$                        | 8.52E+12   | 6.55E+12    | 7.01E+04              | 7.60E+04               |
| $\text{CH}^* + \text{H}^* \rightleftharpoons \text{CH}_2^* + *$                     | 2.15E+13   | 4.66E+12    | 5.80E+04              | 2.70E+04               |
| $\text{CH}_2^* + \text{H}^* \rightleftharpoons \text{CH}_3^* + *$                   | 4.09E+12   | 4.75E+12    | 2.62E+04              | 5.50E+04               |
| $\text{CO}_2^* + \text{H}^* \rightleftharpoons \text{COOH}^* + *$                   | 1.94E+13   | 1.87E+13    | 8.81E+04              | 6.59E+04               |
| $\text{COOH}^* + * \rightleftharpoons \text{COH}^* + \text{O}^*$                    | 4.40E+13   | 3.84E+13    | 2.23E+05              | 1.71E+05               |
| $\text{COH}^* + \text{H}^* \rightleftharpoons \text{HCOH}^* + *$                    | 7.31E+12   | 1.15E+13    | 8.13E+04              | 7.89E+04               |
| $\text{HCOH}^* + \text{H}^* \rightleftharpoons \text{H}_2\text{COH}^*$              | 9.78E+12   | 7.97E+12    | 3.29E+04              | 1.05E+04               |
| $\text{H}_2\text{COH}^* + \text{H}^* \rightleftharpoons \text{H}_3\text{COH}^* + *$ | 4.76E+12   | 2.74E+11    | 6.05E+04              | 6.78E+04               |
| $\text{CO}_2^* + \text{H}^* \rightleftharpoons \text{HCOO}^* + *$                   | 4.48E+12   | 4.05E+12    | 2.51E+04              | 5.25E+04               |
| $\text{HCOO}^* + * \rightleftharpoons \text{HCO}^* + \text{O}^*$                    | 1.90E+12   | 7.24E+12    | 1.34E+05              | 6.93E+04               |
| $\text{HCO}^* + \text{H}^* \rightleftharpoons \text{H}_2\text{CO}^* + *$            | 1.10E+13   | 1.43E+13    | 3.52E+04              | 2.92E+04               |
| $\text{H}_2\text{CO}^* + \text{H}^* \rightleftharpoons \text{H}_3\text{CO}^* + *$   | 2.18E+13   | 3.08E+12    | 1.00E+05              | 9.91E+04               |
| $\text{COOH}^* + * \rightleftharpoons \text{CO}^* + \text{OH}^*$                    | 1.23E+13   | 2.48E+12    | 3.37E+04              | 1.12E+05               |
| $\text{COH}^* + * \rightleftharpoons \text{CO}^* + \text{H}^*$                      | 3.04E+12   | 1.81E+12    | 3.21E+04              | 1.24E+05               |
| $\text{COH}^* + * \rightleftharpoons \text{C}^* + \text{OH}^*$                      | 3.35E+12   | 1.27E+13    | 6.13E+04              | 1.41E+05               |
| $\text{HCOH}^* + * \rightleftharpoons \text{CH}^* + \text{OH}^*$                    | 8.04E+12   | 1.48E+13    | 6.62E+04              | 1.55E+05               |
| $\text{H}_2\text{COH}^* + * \rightleftharpoons \text{CH}_2^* + \text{OH}^*$         | 1.03E+13   | 5.05E+12    | 6.81E+04              | 1.48E+05               |
| $\text{H}_3\text{COH}^* + * \rightleftharpoons \text{CH}_3^* + \text{OH}^*$         | 2.21E+13   | 2.19E+14    | 1.56E+05              | 2.57E+05               |
| $\text{HCO}^* + * \rightleftharpoons \text{CH}^* + \text{O}^*$                      | 8.31E+12   | 1.51E+13    | 9.84E+04              | 1.09E+05               |
| $\text{HCO}^* + * \rightleftharpoons \text{CO}^* + \text{H}^*$                      | 5.87E+13   | 8.51E+12    | 3.14E+04              | 8.69E+04               |
| $\text{H}_2\text{CO}^* + * \rightleftharpoons \text{CH}_2^* + \text{O}^*$           | 6.71E+12   | 2.03E+12    | 8.23E+04              | 6.84E+04               |
| $\text{H}_3\text{CO}^* + * \rightleftharpoons \text{CH}_3^* + \text{O}^*$           | 2.65E+13   | 6.58E+13    | 1.82E+05              | 1.98E+05               |
| $\text{HCO}^* + \text{H}^* \rightleftharpoons \text{HCOH}^* + *$                    | 1.63E+13   | 6.28E+12    | 6.38E+04              | 2.47E+04               |
| $\text{H}_2\text{CO}^* + \text{H}^* \rightleftharpoons \text{H}_2\text{COH}^*$      | 2.48E+13   | 5.98E+12    | 1.42E+05              | 8.67E+04               |
| $\text{H}_3\text{CO}^* + \text{H}^* \rightleftharpoons \text{H}_3\text{COH}^*$      | 8.17E+12   | 7.98E+11    | 9.66E+04              | 4.99E+04               |
| $\text{H}^* + \text{O}^* \rightleftharpoons \text{OH}^* + *$                        | 1.15E+13   | 4.47E+12    | 9.82E+04              | 1.37E+05               |
| $\text{OH}^* + \text{H}^* \rightleftharpoons \text{H}_2\text{O}^* + *$              | 7.28E+12   | 4.95E+11    | 1.41E+05              | 1.00E+05               |
| $\text{OH}^* + \text{OH}^* \rightleftharpoons \text{H}_2\text{O}^* + \text{O}^*$    | 1.18E+13   | 2.07E+12    | 1.10E+05              | 3.11E+04               |

Table S 19. Input values of adsorption and desorption reactions for microkinetics simulations on Ni(110). For A-H and Lat. see Table S 12 and Table S 13, respectively.

| Ni(110)                                                          |      |     |                     |          |               |                     |                                |
|------------------------------------------------------------------|------|-----|---------------------|----------|---------------|---------------------|--------------------------------|
| Elementary reaction                                              | Lat. | A-H | A (m <sup>2</sup> ) | m (a.u.) | Stick. Coëff. | $Q_{\text{vib}}(-)$ | $E_{\text{des}}(\text{J/mol})$ |
| $\text{CO}_2 + * \rightleftharpoons \text{CO}_2^*$               | ...  | ... | 2.19E-20            | 44       | 0.1           | 11.768              | 5.87E+04                       |
| $\text{H}_2 + 2* \rightleftharpoons 2\text{H}^*$                 | ...  | ... | 4.38E-20            | 2        | 0.96          | 4.362               | 7.94E+04                       |
| $\text{CH}_4 + 2* \rightleftharpoons \text{CH}_3^* + \text{H}^*$ | ...  | ... | 4.38E-20            | 16       | 1.00E-08      | 20.944              | -7.00E+04                      |
| $\text{H}_2\text{O} + * \rightleftharpoons \text{H}_2\text{O}^*$ | ...  | ... | 2.19E-20            | 18       | 1             | 5.652               | 3.23E+04                       |

Table S 20. Input values of surface reactions for microkinetics simulations on Ni(211).

| Ni(211)                                                                             |            |             |                       |                        |
|-------------------------------------------------------------------------------------|------------|-------------|-----------------------|------------------------|
| Elementary reaction                                                                 | $\nu$ forw | $\nu$ backw | $E_{\text{act forw}}$ | $E_{\text{act backw}}$ |
| $\text{CO}_2^* + * \rightleftharpoons \text{CO}^* + \text{O}^*$                     | 3.43E+10   | 7.52E+12    | 9.05E+04              | 1.58E+05               |
| $\text{CO}^* + * \rightleftharpoons \text{C}^* + \text{O}^*$                        | 1.04E+12   | 7.52E+12    | 1.58E+05              | 1.68E+05               |
| $\text{C}^* + \text{H}^* \rightleftharpoons \text{CH}^* + *$                        | 1.07E+13   | 7.52E+12    | 6.15E+04              | 3.77E+04               |
| $\text{CH}^* + \text{H}^* \rightleftharpoons \text{CH}_2^* + *$                     | 1.94E+13   | 7.52E+12    | 7.43E+04              | 2.57E+04               |
| $\text{CH}_2^* + \text{H}^* \rightleftharpoons \text{CH}_3^* + *$                   | 5.12E+13   | 7.52E+12    | 4.36E+04              | 5.87E+04               |
| $\text{CO}_2^* + \text{H}^* \rightleftharpoons \text{COOH}^* + *$                   | 2.00E+12   | 7.52E+12    | 9.00E+04              | 6.74E+04               |
| $\text{COOH}^* + * \rightleftharpoons \text{COH}^* + \text{O}^*$                    | 3.82E+12   | 7.52E+12    | 1.65E+05              | 1.75E+05               |
| $\text{COH}^* + \text{H}^* \rightleftharpoons \text{HCOH}^* + *$                    | 1.62E+13   | 7.52E+12    | 9.71E+04              | 4.30E+04               |
| $\text{HCOH}^* + \text{H}^* \rightleftharpoons \text{H}_2\text{COH}^*$              | 1.04E+13   | 7.52E+12    | 3.27E+04              | 2.00E+04               |
| $\text{H}_2\text{COH}^* + \text{H}^* \rightleftharpoons \text{H}_3\text{COH}^* + *$ | 3.61E+13   | 7.52E+12    | 7.90E+04              | 5.88E+04               |
| $\text{CO}_2^* + \text{H}^* \rightleftharpoons \text{HCOO}^* + *$                   | 4.17E+12   | 7.52E+12    | 8.72E+04              | 1.18E+05               |
| $\text{HCOO}^* + * \rightleftharpoons \text{HCO}^* + \text{O}^*$                    | 7.76E+12   | 7.52E+12    | 1.67E+05              | 1.33E+05               |
| $\text{HCO}^* + \text{H}^* \rightleftharpoons \text{H}_2\text{CO}^* + *$            | 1.41E+13   | 7.52E+12    | 8.73E+04              | 2.92E+04               |
| $\text{H}_2\text{CO}^* + \text{H}^* \rightleftharpoons \text{H}_3\text{CO}^* + *$   | 1.11E+13   | 7.52E+12    | 7.82E+04              | 1.06E+05               |
| $\text{COOH}^* + * \rightleftharpoons \text{CO}^* + \text{OH}^*$                    | 9.52E+13   | 7.52E+12    | 3.68E+04              | 1.35E+05               |
| $\text{COH}^* + * \rightleftharpoons \text{CO}^* + \text{H}^*$                      | 1.29E+13   | 7.52E+12    | 3.13E+04              | 1.11E+05               |
| $\text{COH}^* + * \rightleftharpoons \text{C}^* + \text{OH}^*$                      | 3.49E+12   | 7.52E+12    | 9.01E+04              | 1.88E+05               |
| $\text{HCOH}^* + * \rightleftharpoons \text{CH}^* + \text{OH}^*$                    | 5.90E+12   | 7.52E+12    | 1.12E+05              | 2.40E+05               |
| $\text{H}_2\text{COH}^* + * \rightleftharpoons \text{CH}_2^* + \text{OH}^*$         | 1.80E+12   | 7.52E+12    | 1.36E+05              | 2.28E+05               |
| $\text{H}_3\text{COH}^* + * \rightleftharpoons \text{CH}_3^* + \text{OH}^*$         | 1.19E+11   | 7.52E+12    | 1.47E+05              | 2.74E+05               |
| $\text{HCO}^* + * \rightleftharpoons \text{CH}^* + \text{O}^*$                      | 1.55E+13   | 7.52E+12    | 1.67E+05              | 2.25E+05               |
| $\text{HCO}^* + * \rightleftharpoons \text{CO}^* + \text{H}^*$                      | 1.57E+13   | 7.52E+12    | 1.84E+03              | 7.31E+04               |
| $\text{H}_2\text{CO}^* + * \rightleftharpoons \text{CH}_2^* + \text{O}^*$           | 1.60E+13   | 7.52E+12    | 1.20E+05              | 1.88E+05               |
| $\text{H}_3\text{CO}^* + * \rightleftharpoons \text{CH}_3^* + \text{O}^*$           | 8.67E+12   | 7.52E+12    | 1.98E+05              | 2.53E+05               |
| $\text{HCO}^* + \text{H}^* \rightleftharpoons \text{HCOH}^* + *$                    | 2.55E+13   | 7.52E+12    | 1.79E+05              | 1.17E+05               |
| $\text{H}_2\text{CO}^* + \text{H}^* \rightleftharpoons \text{H}_2\text{COH}^*$      | 4.84E+13   | 7.52E+12    | 7.41E+04              | 5.69E+04               |
| $\text{H}_3\text{CO}^* + \text{H}^* \rightleftharpoons \text{H}_3\text{COH}^*$      | 1.63E+14   | 7.52E+12    | 1.04E+05              | 3.87E+04               |
| $\text{H}^* + \text{O}^* \rightleftharpoons \text{OH}^* + *$                        | 9.38E+12   | 7.52E+12    | 8.80E+04              | 9.57E+04               |
| $\text{OH}^* + \text{H}^* \rightleftharpoons \text{H}_2\text{O}^* + *$              | 4.27E+13   | 7.52E+12    | 1.35E+05              | 7.15E+04               |
| $\text{OH}^* + \text{OH}^* \rightleftharpoons \text{H}_2\text{O}^* + \text{O}^*$    | 8.33E+12   | 7.52E+12    | 1.06E+05              | 3.51E+04               |

Table S 21. Input values of adsorption and desorption reactions for microkinetics simulations on Ni(211). For A-H and Lat. see Table S 12 and Table S 13, respectively.

| Ni(211)                                                          |      |     |                     |          |               |                     |                                |
|------------------------------------------------------------------|------|-----|---------------------|----------|---------------|---------------------|--------------------------------|
| Elementary reaction                                              | Lat. | A-H | A (m <sup>2</sup> ) | m (a.u.) | Stick. Coëff. | $Q_{\text{vib}}(-)$ | $E_{\text{des}}(\text{J/mol})$ |
| $\text{CO}_2 + * \rightleftharpoons \text{CO}_2^*$               | ...  | ... | 6.10E-20            | 44       | 9.33E-02      | 12.526              | 4.15E+04                       |
| $\text{H}_2 + 2* \rightleftharpoons 2\text{H}^*$                 | ...  | ... | 5.24E-20            | 2        | 0.7           | 2.648               | 6.37E+04                       |
| $\text{CH}_4 + 2* \rightleftharpoons \text{CH}_3^* + \text{H}^*$ | ...  | ... | 5.24E-20            | 16       | 2.80E-07      | 15.129              | -1.13E+05                      |
| $\text{H}_2\text{O} + * \rightleftharpoons \text{H}_2\text{O}^*$ | ...  | ... | 6.10E-20            | 18       | 1             | 5.125               | 3.72E+04                       |

## Output

## Degree of Rate Control

Heatmaps of the Degree of Rate Control (DRC) coefficients of each elementary reaction step from 500-800 K for each nickel facet are given in Figure S 44. Both  $\text{CO}^*$  and  $\text{H}^*$  were destabilized with 40 and 20 kJ/mol, respectively. Note a different range in the coefficients for Ni(100) compared to the other facets.

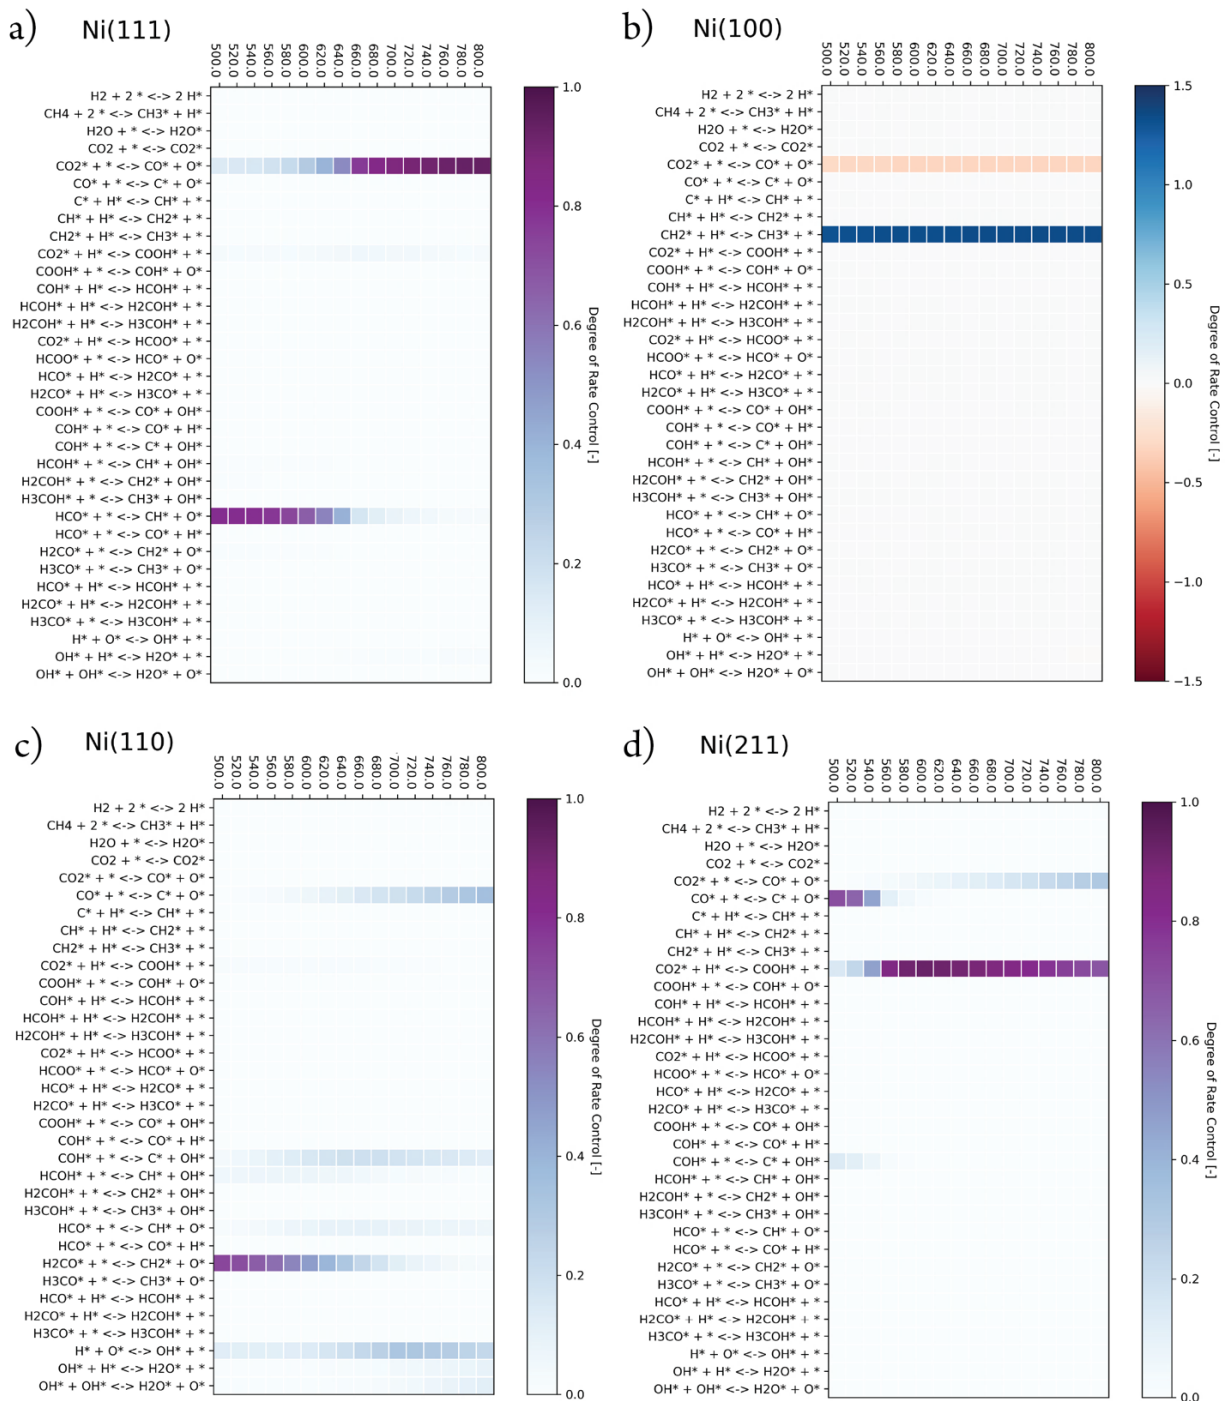

Figure S 44. Degree of Rate Control (DRC) coefficients of each elementary reaction step as a function of temperature for a) Ni(111), b) Ni(100), c) Ni(110) and d) Ni(211).

**Rate methane formation**

For the boundary conditions of the MKM simulations we have used the stoichiometric ratio of 1:4 for the partial pressure of CO<sub>2</sub> and H<sub>2</sub> and the total pressure was set at 1 bar. The obtained methane production rates as a function of temperature are tabulated below (Table S 22).

Table S 22. Methane production rate from 500 - 800 K for four nickel facets.

| Rate methane formation (s <sup>-1</sup> ) |          |          |          |          |
|-------------------------------------------|----------|----------|----------|----------|
| Temperature (K)                           | Ni(111)  | Ni(100)  | Ni(110)  | Ni(211)  |
| 500                                       | 6.51E-10 | 1.23E-09 | 4.66E-04 | 4.01E-06 |
| 520                                       | 3.89E-09 | 3.77E-09 | 1.36E-03 | 1.64E-05 |
| 540                                       | 1.97E-08 | 1.05E-08 | 3.62E-03 | 4.96E-05 |
| 560                                       | 8.54E-08 | 2.66E-08 | 8.91E-03 | 8.64E-05 |
| 580                                       | 3.18E-07 | 6.27E-08 | 2.03E-02 | 1.10E-04 |
| 600                                       | 1.02E-06 | 1.38E-07 | 4.32E-02 | 1.27E-04 |
| 620                                       | 2.78E-06 | 2.87E-07 | 8.58E-02 | 1.40E-04 |
| 640                                       | 6.46E-06 | 5.64E-07 | 1.59E-01 | 1.51E-04 |
| 660                                       | 1.20E-05 | 1.06E-06 | 2.74E-01 | 1.59E-04 |
| 680                                       | 1.94E-05 | 1.90E-06 | 4.37E-01 | 1.65E-04 |
| 700                                       | 2.94E-05 | 3.29E-06 | 6.29E-01 | 1.69E-04 |
| 720                                       | 4.23E-05 | 5.49E-06 | 8.43E-01 | 1.73E-04 |
| 740                                       | 5.83E-05 | 8.87E-06 | 1.08E+00 | 1.76E-04 |
| 760                                       | 7.76E-05 | 1.39E-05 | 1.34E+00 | 1.78E-04 |
| 780                                       | 1.00E-04 | 2.13E-05 | 1.61E+00 | 1.79E-04 |
| 800                                       | 1.27E-04 | 3.17E-05 | 1.88E+00 | 1.80E-04 |



### Flux diagram at 580 K for Ni(111)

B. Kreitz et al.<sup>7</sup> developed a microkinetic model for the hydrogenation of CO<sub>2</sub> on Ni(111) at 573 K by means of automatic mechanism generation combined with a global sensitivity analysis. They found that 75 % of CO\* formation occurs via direct CO<sub>2</sub>\* dissociation and the other 25 % is formed via various elementary reaction steps in the carboxyl pathway. They also found that the only significant source of CH\* originates from the dissociation of HCO\*.

In order to compare these findings with our microkinetic model, we constructed a flux diagram of Ni(111) at 580 K, which is depicted below (Figure S 45). We see that 88 % of CO\* formation occurs via direct CO<sub>2</sub>\* dissociation and the other 12 % is formed via COOH\* intermediate, which is part of the carboxyl pathway. Just like we saw at 640 K, also at 580 K we see that for Ni(111) there is only a significant formation of CH\* via the HCO\* intermediate. The results from our microkinetic model are in very close agreement with proposed mechanism by B. Kreitz et al.<sup>7</sup>.

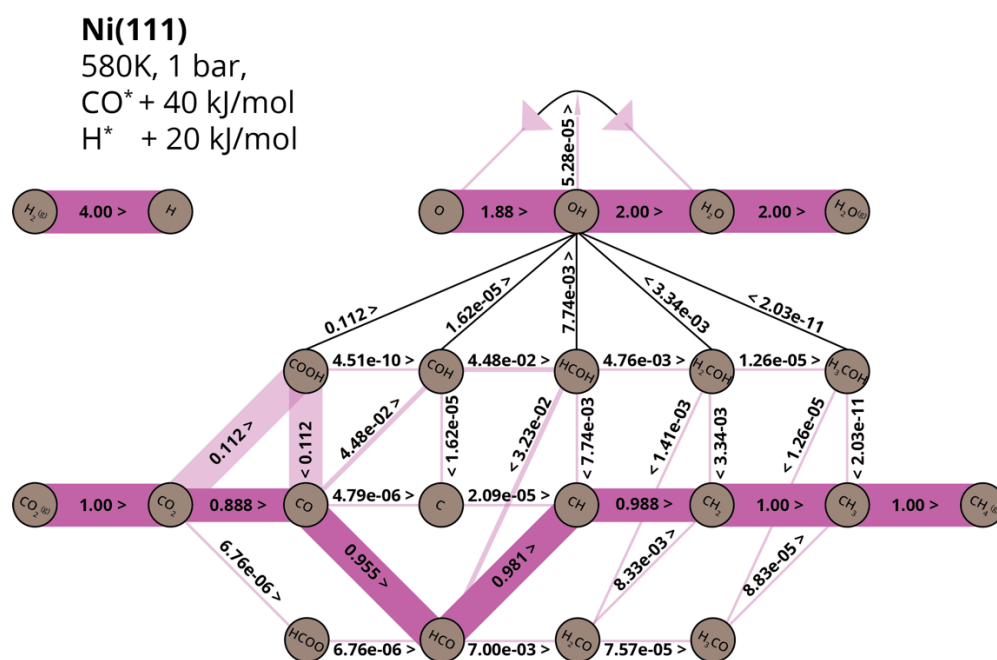

Figure S 45. Flux diagram of Ni(111) at 580 K and 1 bar. Bars of elementary reaction steps with significant - but not the largest flux - are transparent. The thickness of the bar that connects the nodes of the reaction network scales with the size of the flux between these nodes. The direction of the flux is indicated with '<' or '>'.

<sup>7</sup> Kreitz, B.; Sargsyan, K.; Blöndal, K.; Mazeau, E. J.; West, R. H.; Wehinger, G. D.; Turek, T.; Goldsmith, C. F. Quantifying the Impact of Parametric Uncertainty on Automatic Mechanism Generation for CO<sub>2</sub> Hydrogenation on Ni(111). *JACS Au* **2021**, No. 111. <https://doi.org/10.1021/jacsau.1c00276>

## I Sensitivity Analysis on the Correction of CO\* Overbinding

In this part we examine the effect of the correction for CO\* overbinding. For this we performed several MKM simulations where CO\* was increasingly destabilized with respect to its most stable adsorption energy, by adding 0, 15, 30 and 40 kJ/mol to its adsorption energy. Other settings were kept the same compared to the simulations as presented in the manuscript. Thus, the most stable adsorption energy was used for other reaction intermediates and H\* was destabilized with 20 kJ/mol. The simulations were performed with an initial CO<sub>2</sub>:H<sub>2</sub> mixture of 1:4, a total pressure of 1 bar and temperatures between 500 - 800 K. The same lateral interaction potential was included as presented in Table S 13.

Below, the results of apparent activation energy, reaction rate, surface coverage, reaction order in H<sub>2</sub> and CO<sub>2</sub>, degree of rate control and reaction fluxes are presented.

### Reaction rate

In Figure S 46, the reaction rates are plotted on a logarithmic scale as a function of temperature. Clearly, an increase in CO\* destabilization results in a higher reaction rate for Ni(111), Ni(110) and Ni(211). For Ni(211) an upper limit in the reaction rate can be observed by the plateau around 640 K. This limitation is the result of the absence of carbonaceous species at higher temperatures. The destabilization of CO\* does not have an effect on the reaction rate for Ni(100). This is likely to be caused by the fact that Ni(100) is suffering from a high surface coverage of C\*. Destabilizing the CO\* intermediate increases the formation of C\*, which in turn blocks the surface for the formation of methane.

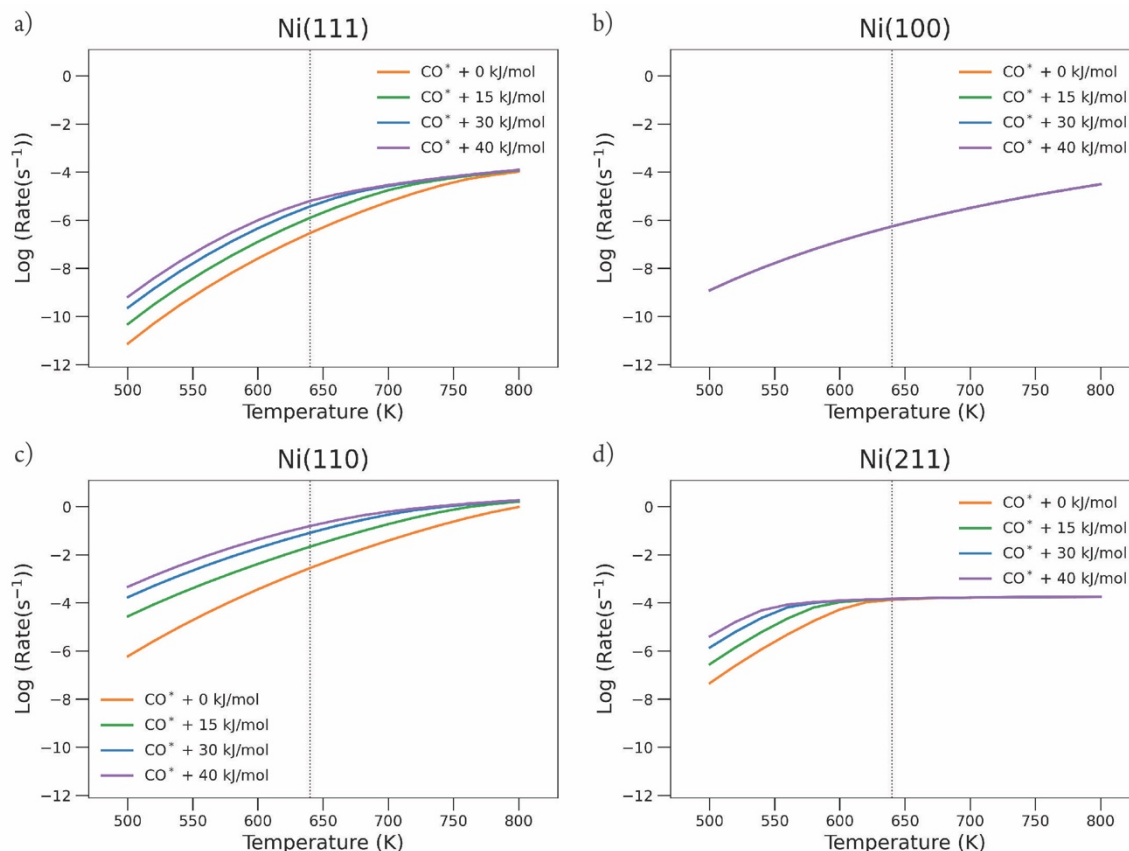

Figure S 46. Reaction rate on a logarithmic scale as a function of temperature with an increasing destabilization of CO\* from 0 to 40 kJ/mol. a) Ni(111), b) Ni(100), c) Ni(110) and d) Ni(211).

## I. Sensitivity Analysis on the Correction of CO\* Overbinding

### Apparent activation energy

The apparent activation energy as a function of temperature is plotted in Figure S 47. For Ni(111), Ni(110) and Ni(211) a decrease in the stability of CO\* results in a shift of the inflection towards lower reaction temperatures. These temperature profiles indicate that the transition from an inactive to an active catalyst occur at lower temperature. The apparent activation energy at 640 K for the most active facet, Ni(110), is 163.1, 133.6, 115.5 and 98.8 kJ/mol for CO\* destabilization of 0, 15, 30 and 40 kJ/mol respectively. Reported apparent activation energies for CO<sub>2</sub> methanation over nickel catalysts supported on various metal oxides range from 77-92 kJ/mol<sup>8,9,10,11,12</sup>. The calculated apparent activation energy of 98.8 kJ/mol for Ni(110) at 640 K gives a satisfactory agreement with literature.

The destabilization of CO\* does not have an effect on the apparent activation energy on Ni(100) in the studied temperature regime. This is likely to be caused by the fact that Ni(100) is suffering from a high surface coverage of C\*, even when CO\* is not destabilized.

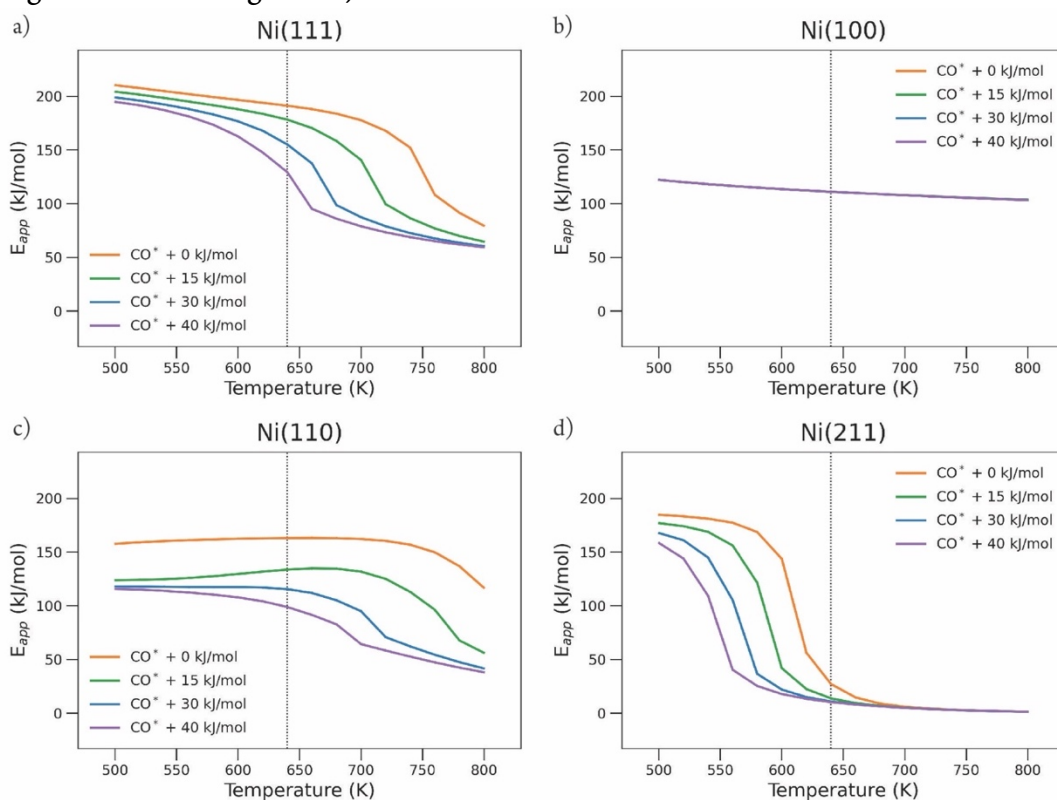

Figure S 47. Apparent activation energy as a function of temperature with an increasing destabilization of CO\* from 0 to 40 kJ/mol. a) Ni(111), b) Ni(100), c) Ni(110) and d) Ni(211).

<sup>8</sup> Wang, W.; Wang, S.; Ma, X.; Gong, J. Recent Advances in Catalytic Hydrogenation of Carbon Dioxide. *Chem. Soc. Rev.* **2011**, *40* (7), 3703–3727. <https://doi.org/10.1039/c1cs15008a>.

<sup>9</sup> Vogt, C.; Monai, M.; Sterk, E. B.; Palle, J.; Melcherts, A. E. M.; Zijlstra, B.; Groeneveld, E.; Berben, P. H.; Boereboom, J. M.; Hensen, E. J. M.; Meirer, F.; Pilot, I. A. W.; Weckhuysen, B. M. Understanding Carbon Dioxide Activation and Carbon–Carbon Coupling over Nickel. *Nat. Commun.* **2019**, *10* (1), 1–10. <https://doi.org/10.1038/s41467-019-12858-3>.

<sup>10</sup> Van Herwijnen, T.; Van Doesburg, H.; De Jong, W. A. Kinetics of the Methanation of CO and CO<sub>2</sub> on a Nickel Catalyst. *J. Catal.* **1973**, *28* (3), 391–402. [https://doi.org/10.1016/0021-9517\(73\)90132-2](https://doi.org/10.1016/0021-9517(73)90132-2).

<sup>11</sup> Weatherbee, G. D.; Bartholomew, C. H. Hydrogenation of CO<sub>2</sub> on Group VIII Metals. I. Specific Activity of Ni SiO<sub>2</sub>. *J. Catal.* **1981**, *68* (1), 67–76. [https://doi.org/10.1016/0021-9517\(81\)90040-3](https://doi.org/10.1016/0021-9517(81)90040-3).

<sup>12</sup> Peebles, D. E.; Goodman, D. W.; White, J. M. Methanation of Carbon Dioxide on Ni(100) and the Effects of Surface Modifiers. *J. Phys. Chem.* **1983**, *87* (22), 4378–4387. <https://doi.org/10.1021/j100245a014>.

## I. Sensitivity Analysis on the Correction of CO\* Overbinding

### Surface coverage

The surface coverages as a function of temperature are plotted in Figure S 48. The color represents the magnitude in which CO\* was destabilized, while a marker is indicative for the type of reaction intermediate.

A similar trend in surface coverage can be observed for Ni(111), Ni(110) and Ni(211). With an increase in CO\* destabilization the surface coverage of CO\* decreases, while the relative amount of H\* and vacant sites increases. The destabilization of CO\* does not have an effect on the surface coverage for Ni(100), since this facet is highly covered with C\* over the whole temperature range.

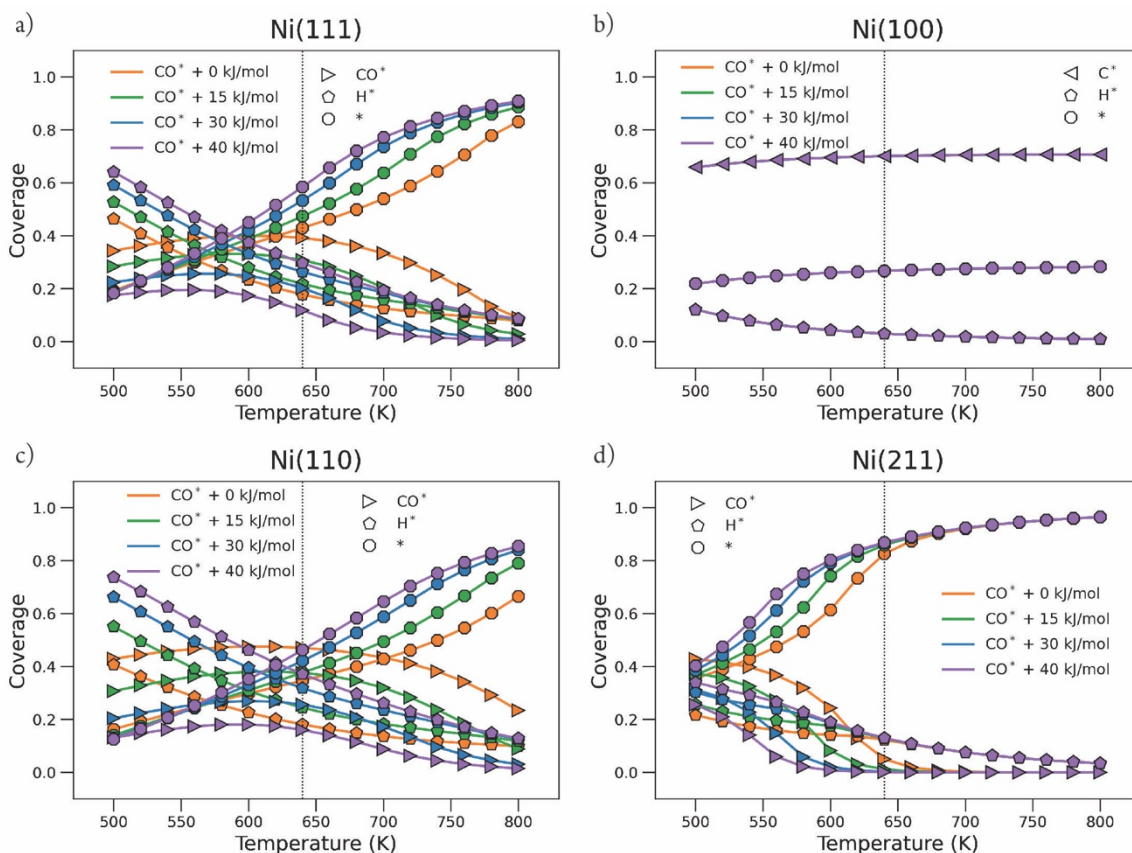

Figure S 48. Surface coverage as a function of temperature with an increasing destabilization of CO\* from 0 to 40 kJ/mol. The color represents the magnitude in which CO\* was destabilized, while the marker is indicative for the type of reaction intermediate. a) Ni(111), b) Ni(100), c) Ni(110) and d) Ni(211).

### Reaction orders

On the next page (Figure S 49) the reaction orders in CO<sub>2</sub> and H<sub>2</sub> are plotted as a function of temperature. Note: the scale of the y-axis differs among different facets. In general, the reaction order in CO<sub>2</sub> increases with an increase in CO\* destabilization. For the order in H<sub>2</sub> a decrease is observed with an increase in CO\* destabilization. Two special cases can be assigned: firstly, for Ni(110) the reaction order in H<sub>2</sub> is the smallest when CO\* is not destabilized. Secondly, in the case of Ni(211), at low temperatures the order in H<sub>2</sub> decreases with an increase in CO\* destabilization, while the opposite is true for temperatures higher than 580 K. For Ni(100) a change in the stability of CO\* does not influence the reaction orders.

## I. Sensitivity Analysis on the Correction of CO\* Overbinding

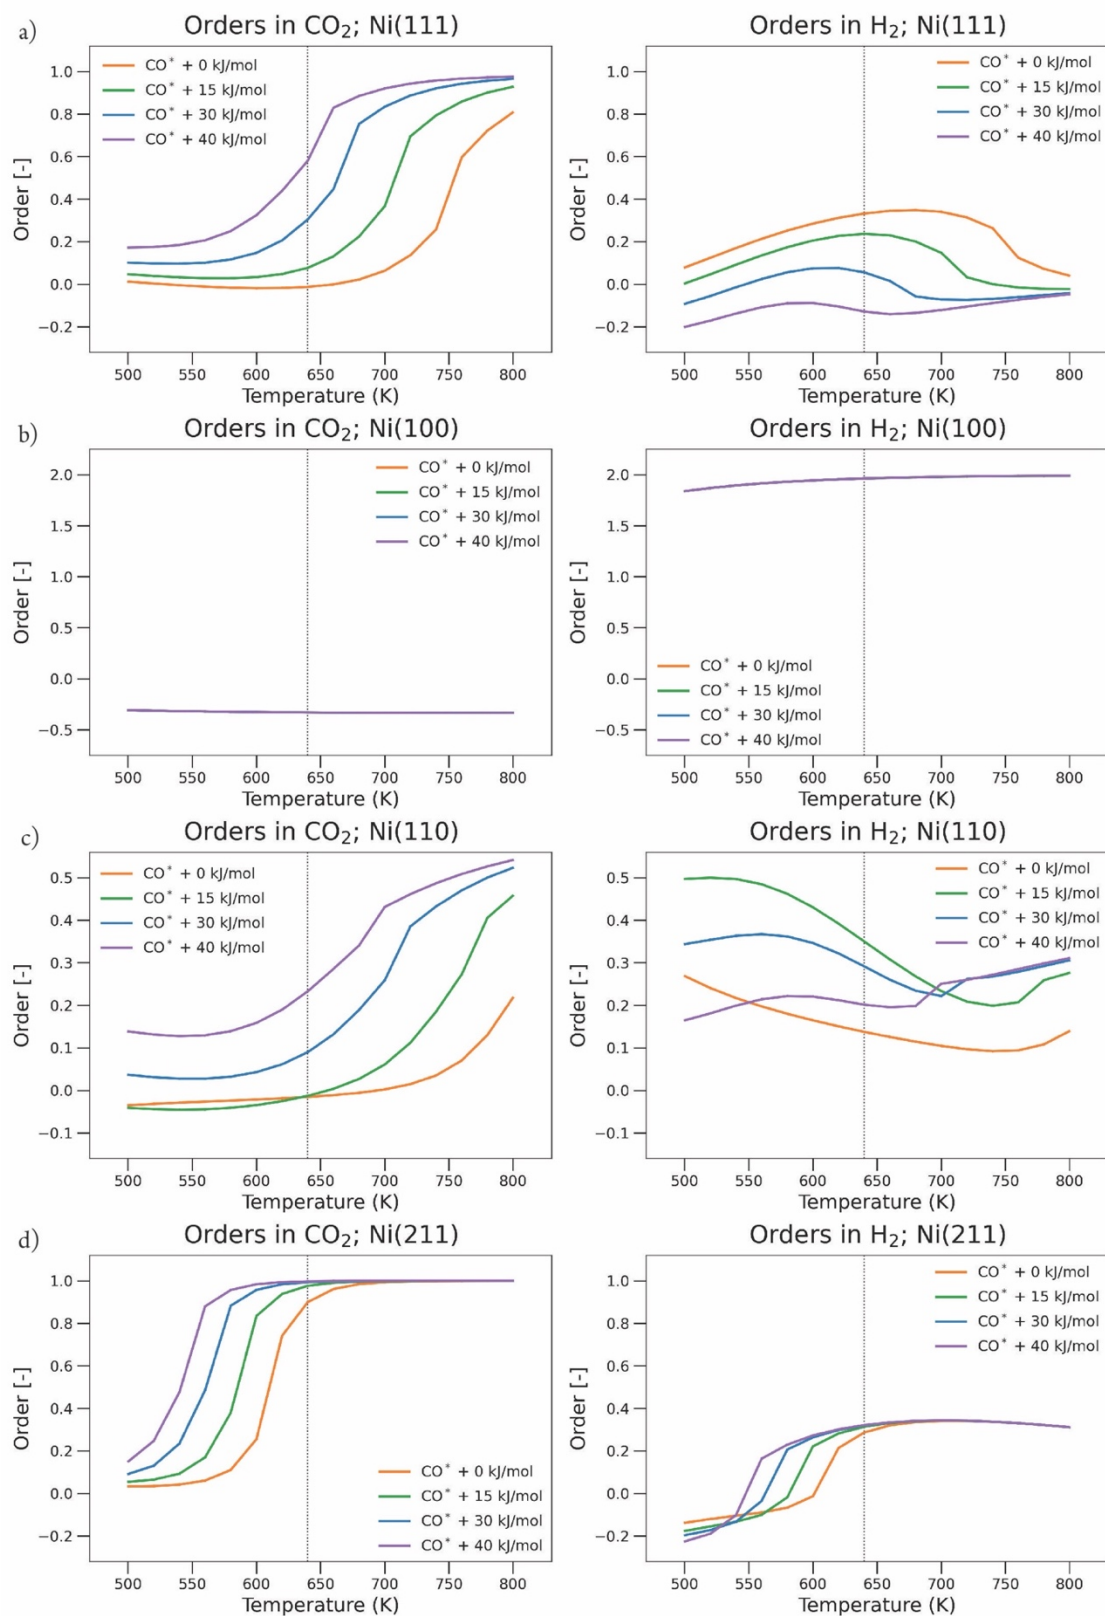

Figure S 49. The reaction orders in CO<sub>2</sub> (left) and H<sub>2</sub> (right) as a function of temperature with an increasing destabilization of CO\* from 0 to 40 kJ/mol. Note: the scale of the y-axis differs among different facets. a) Ni(111), b) Ni(100), c) Ni(110) and d) Ni(211).

## I. Sensitivity Analysis on the Correction of CO\* Overbinding

### Degree of rate control

Below, as a function of temperature the coefficients of the degree of rate control (DRC) analysis are presented in heatmaps. Note: the scale for Ni(100) runs from -1.5 to 1.5 (Figure S 52), while for Ni(111) (Figure S 50), Ni(110) (Figure S 53) and Ni(211) (Figure S 51) the scale runs from 0 to 1.

CO\* destabilization does not have an effect on the DRC for Ni(100).

For the other facets, the trend in the DRC-coefficients of rate controlling elementary reaction steps shift to lower or higher temperatures. For example, in the case of Ni(111) the dissociation of CO<sub>2</sub>\* towards CO\* and O\* becomes increasingly rate controlling at lower temperatures with a destabilization in CO\*, while the dissociation of HCO\* towards CH\* and O\* becomes less rate controlling at higher temperatures. These effects are a direct consequence of the corresponding decrease in CO\* coverage on Ni(111), see p.67. With a decrease in CO\* coverage, the first C-O bond dissociation becomes more controlling compared to the dissociation of the second C-O bond.

This can also be observed for Ni(211), where the activation of CO<sub>2</sub>\* towards COOH\* becomes more rate controlling at lower temperatures and the direct CO\* dissociation becomes less rate controlling at higher temperatures. The DRC-coefficient of the direct CO<sub>2</sub>\* dissociation towards CO\* and O\* remain roughly constant. This already indicates that the reaction flux of hydrogen assisted CO<sub>2</sub>\* dissociation through COOH\* is higher compared to the direct CO<sub>2</sub>\* dissociation. More subtle changes are observed in the case of Ni(110). Direct CO\* dissociation becomes less rate controlling when CO\* is destabilized. When CO\* is destabilized with +15, +30 and +40 kJ/mol the trend of the DRC-coefficients as a function of temperature remains roughly the same.

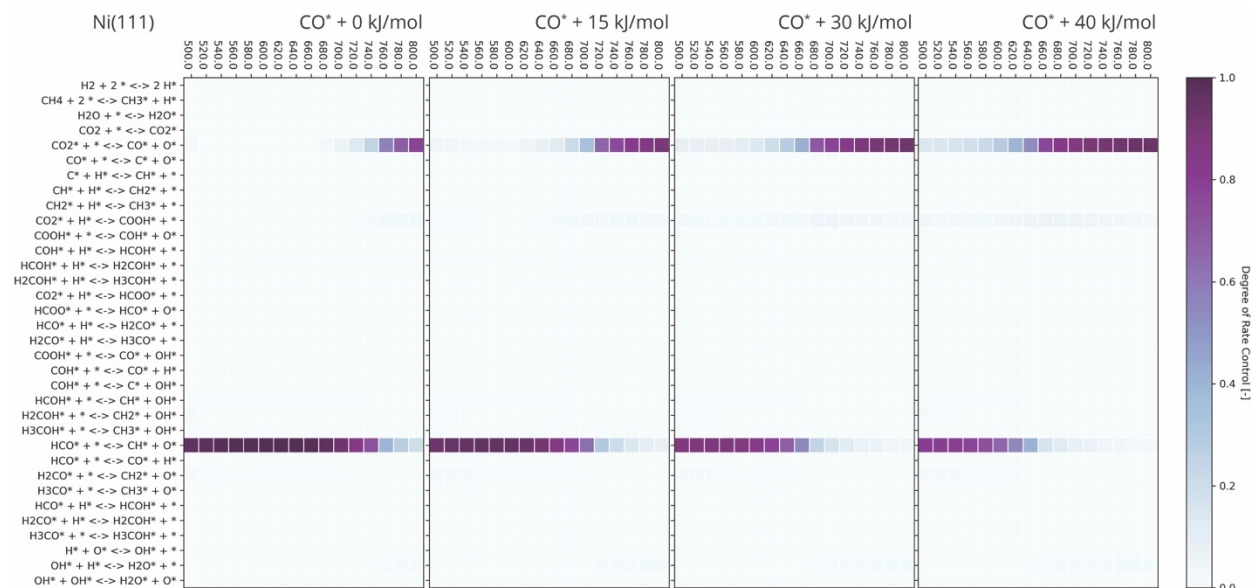

Figure S 50. Degree of Rate Control (DRC) coefficients of each elementary reaction step for Ni(111) as a function of temperature with an increasing destabilization of CO\* from 0 to 40 kJ/mol.

# I. Sensitivity Analysis on the Correction of CO\* Overbinding

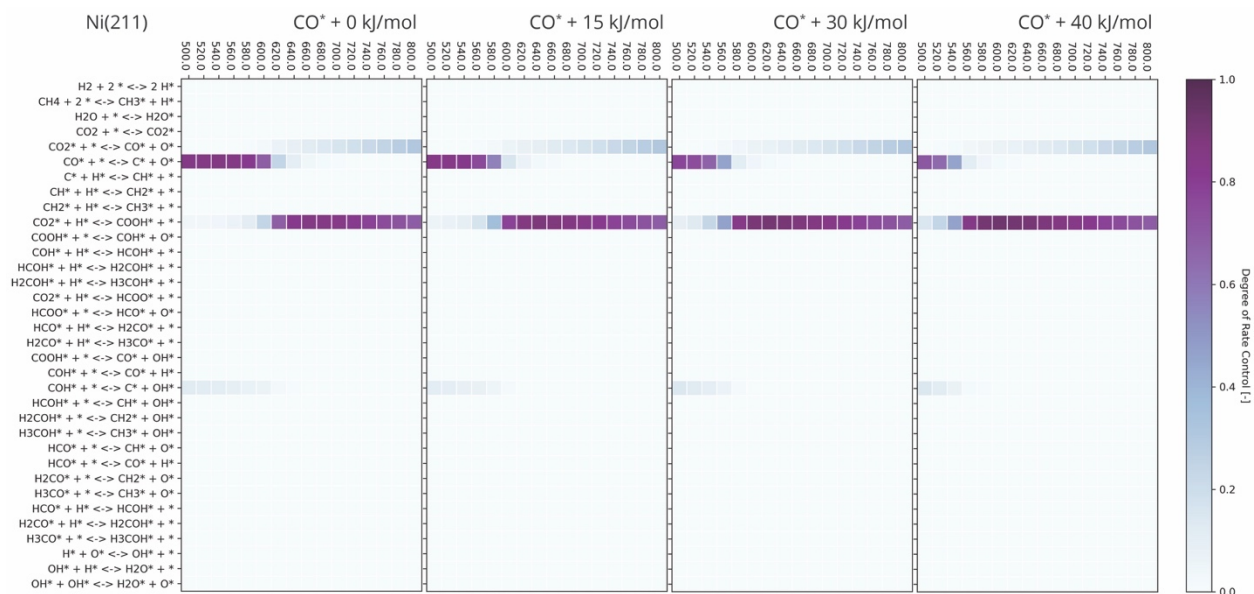

Figure S 51. Degree of Rate Control (DRC) coefficients of each elementary reaction step for Ni(211) as a function of temperature with an increasing destabilization of CO\* from 0 to 40 kJ/mol.

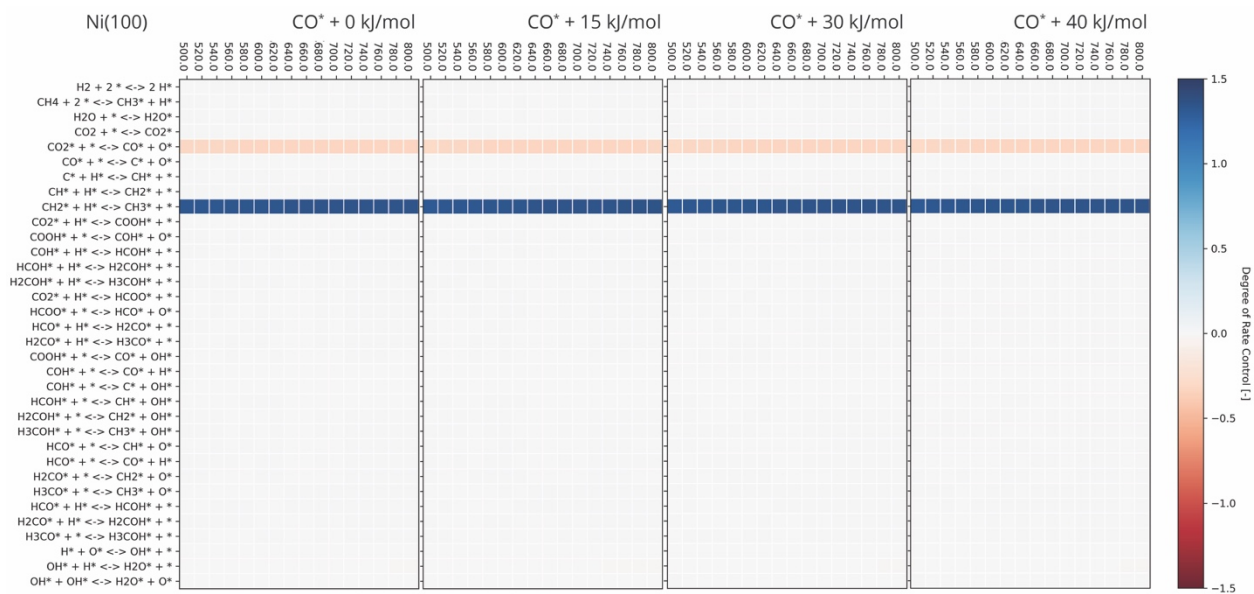

Figure S 52. Degree of Rate Control (DRC) coefficients of each elementary reaction step for Ni(100) as a function of temperature with an increasing destabilization of CO\* from 0 to 40 kJ/mol.

## I. Sensitivity Analysis on the Correction of CO\* Overbinding

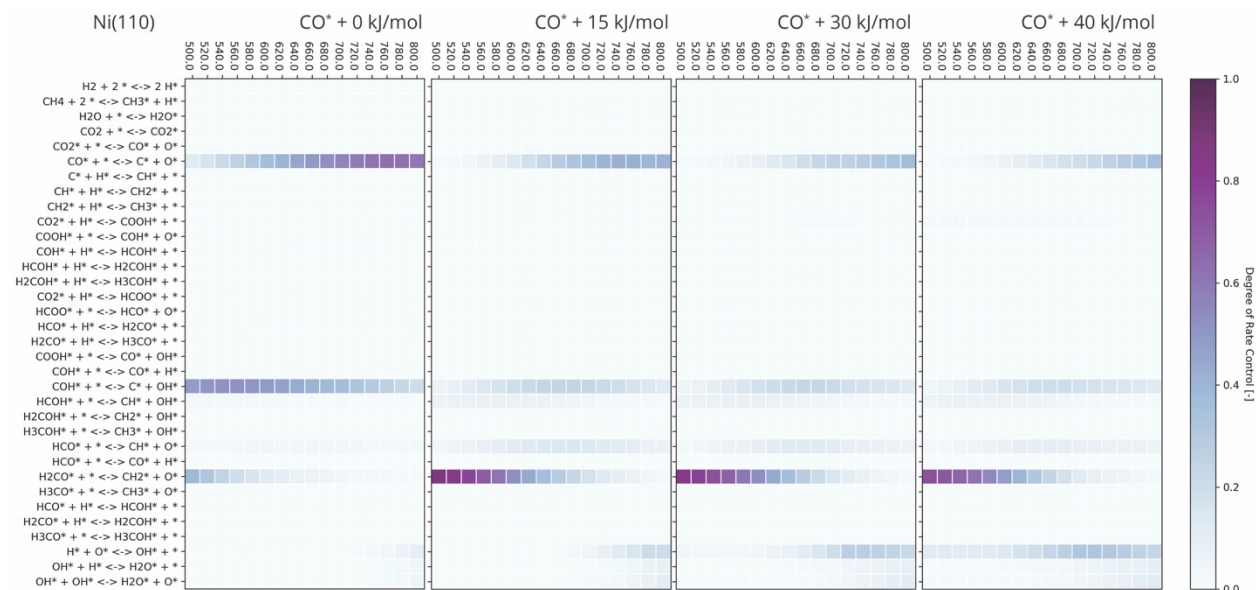

Figure S 53. Degree of Rate Control (DRC) coefficients of each elementary reaction step for Ni(110) as a function of temperature with an increasing destabilization of CO\* from 0 to 40 kJ/mol.

### Flux diagrams

The flux diagrams corresponding to 640 K are depicted in Figure S 54 to Figure S 57.

For Ni(111), Ni(100) and Ni(211) the significant flux remain the same with a change in CO\* stability. Comparing the diagrams of Ni(111) only small differences can be seen in the magnitude of flux between nodes. The flux diagrams of Ni(100) are identical where CO\* is destabilized with 30 and 40 kJ/mol. Comparing the first two diagrams of Ni(100), only small differences can be seen in the magnitude of flux between nodes.

For Ni(211) the flux diagrams where CO\* is destabilized with 0, 30 or 40 kJ/mol are identical. Only the destabilization of CO\* with 15 kJ/mol results in a different flux diagram, with the most prominent difference in the flux between the nodes of CO – C and O – OH.

The most apparent differences can be observed for Ni(110). When CO\* is not destabilized, the main flux goes via the direct carbide mechanism on Ni(110). With an increase in the destabilization of CO\*, the main flux shifts from direct CO\* dissociation towards H-assisted CO\* dissociation via H<sub>2</sub>CO\*. When CO\* is destabilized with 30 and 40 kJ/mol, CO<sub>2</sub>\* dissociation via COOH\* becomes significant. However, the flux for direct CO<sub>2</sub>\* dissociation remain larger.



# I. Sensitivity Analysis on the Correction of CO\* Overbinding

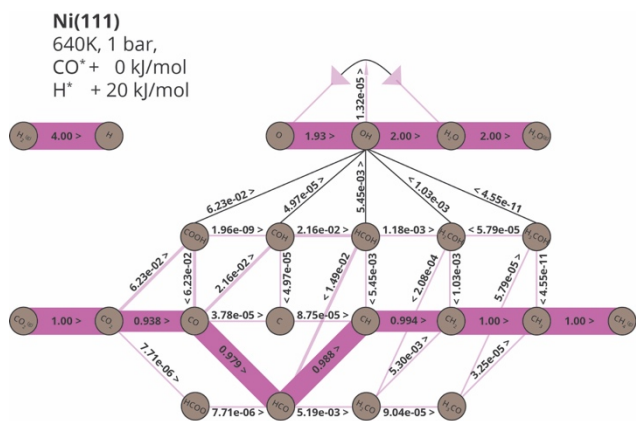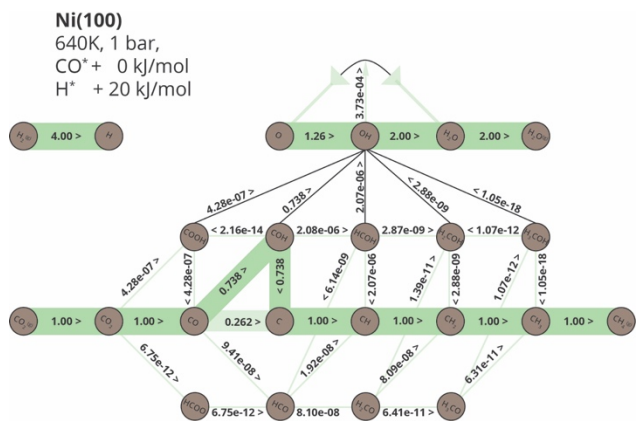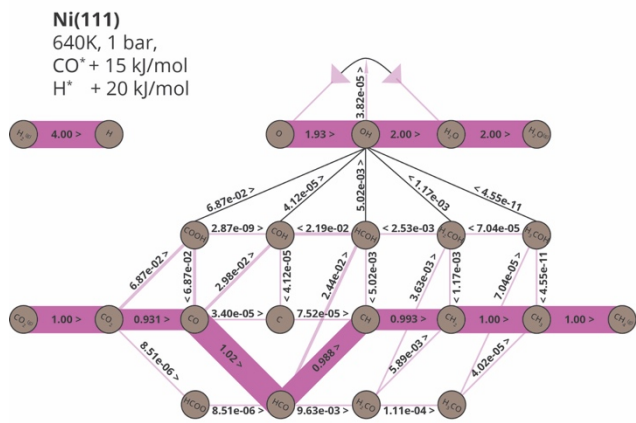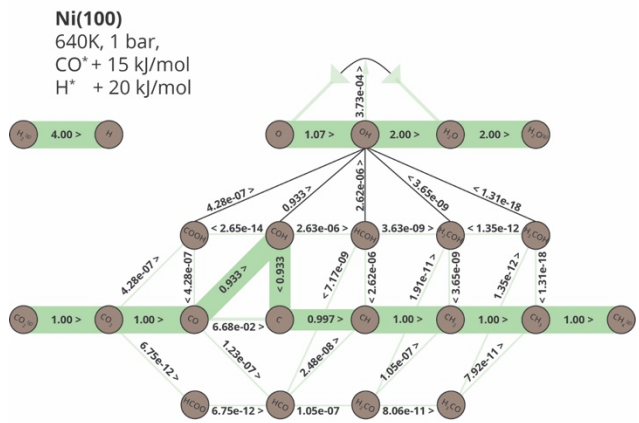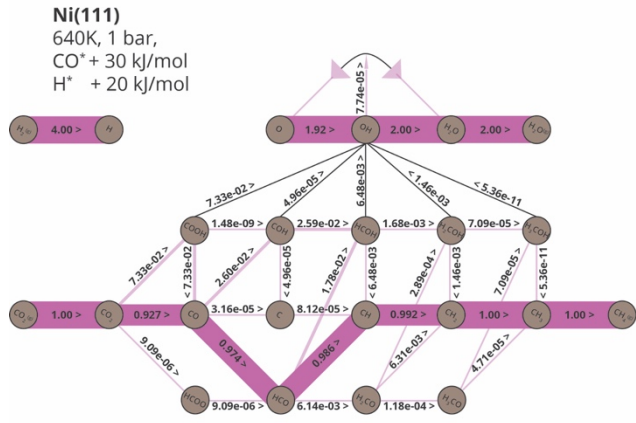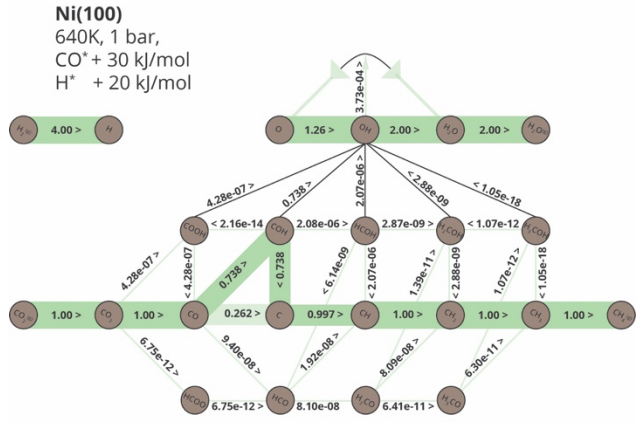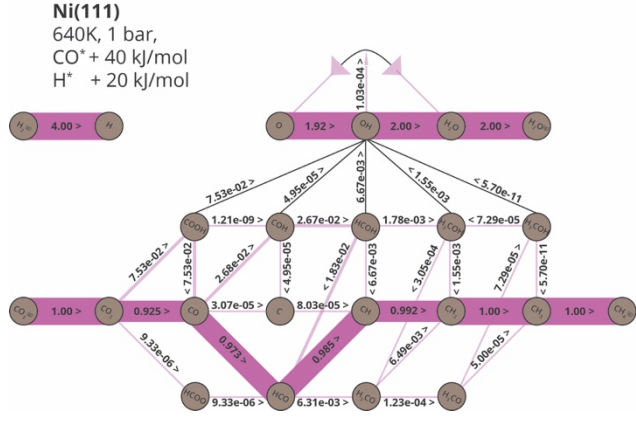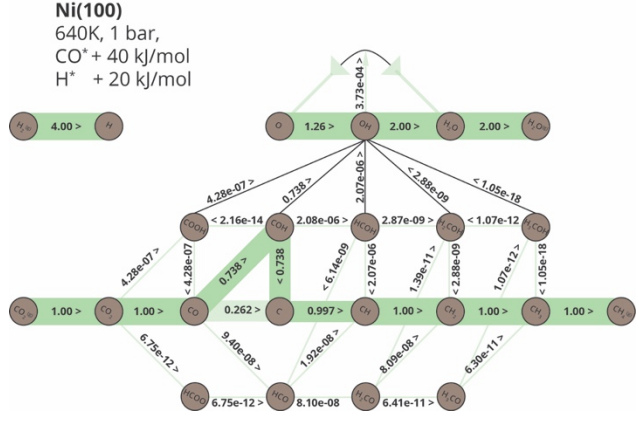

Figure S 55. Flux diagrams at 640 K for Ni(111) with an increasing destabilization of CO\* from 0 to 40 kJ/mol.

Figure S 54. Flux diagrams at 640 K for Ni(100) with an increasing destabilization of CO\* from 0 to 40 kJ/mol.

# I. Sensitivity Analysis on the Correction of CO\* Overbinding

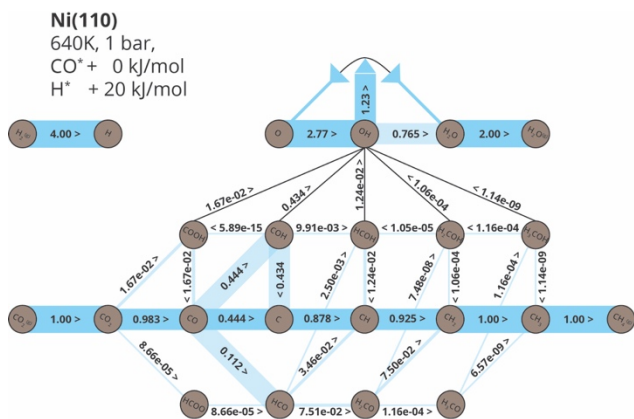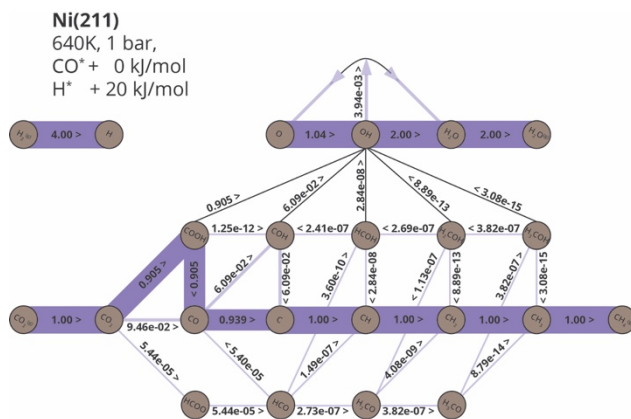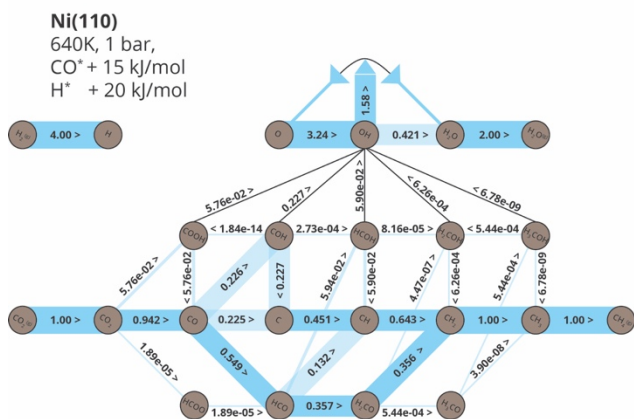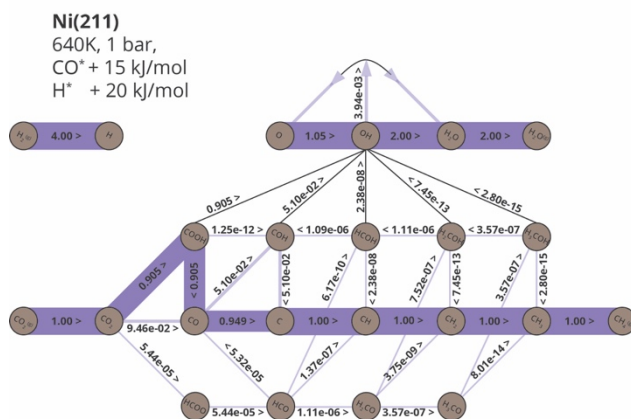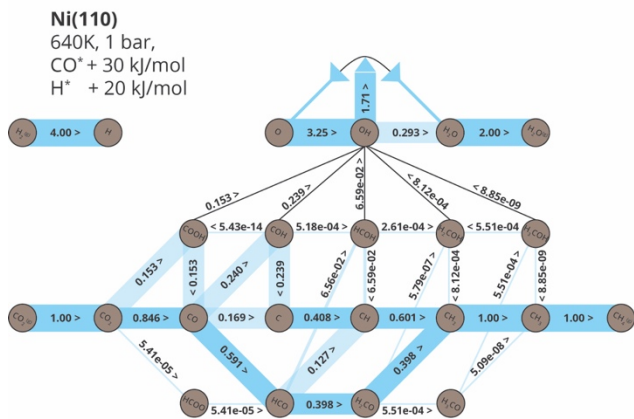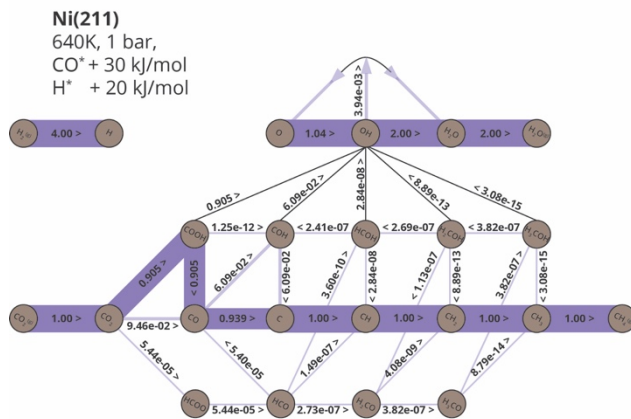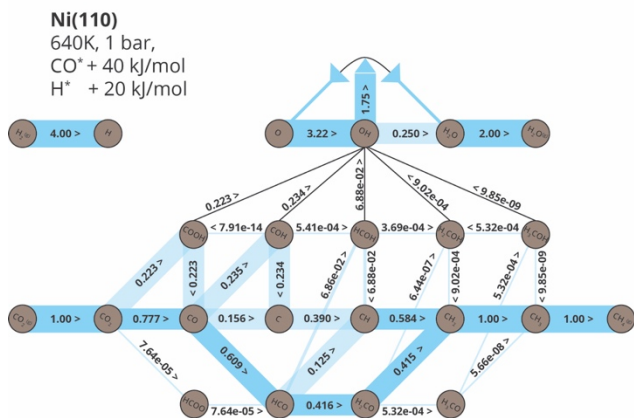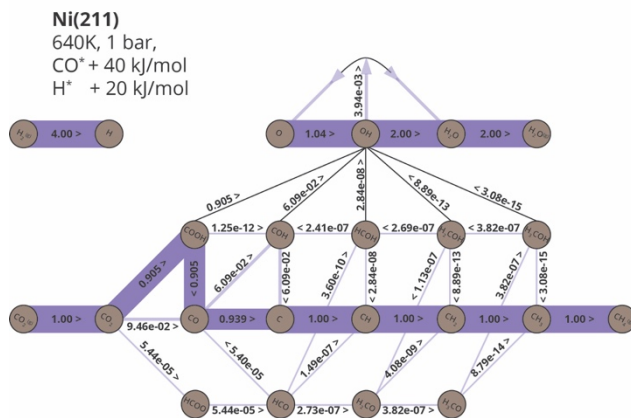

Figure S 57. Flux diagrams at 640 K for Ni(110) with an increasing destabilization of CO\* from 0 to 40 kJ/mol.

Figure S 56. Flux diagrams at 640 K for Ni(211) with an increasing destabilization of CO\* from 0 to 40 kJ/mol.

## J Sensitivity Analysis on the Lateral Interaction Potential

For the inclusion of the lateral interaction potential, we used the same pragmatic approach as described in literature<sup>6</sup>, where it was used for a cobalt system. There it is stated that the lateral interaction is mainly caused by the exponential nature of electronic repulsion of electron density on the adsorbates. Nickel and cobalt are same row neighbors in the periodic table and their electronegativities are almost identical<sup>13</sup> (1.91 and 1.88, respectively), therefore it is expected that the part of electron density on the adsorbates causing the lateral interaction is quite similar for the two transition metals. In order to properly validate and justify the use of the same atom-based lateral interaction penalties, we conducted a series of MKM simulations using different penalty values and analyzed the effect on the apparent activation energy, the reaction orders and the surface coverage. Table S 23 shows the values we used for testing the lateral interaction potential.

Table S 23. Tested penalties for the lateral interaction potential.

| Lateral Interaction Penalty |        |          |
|-----------------------------|--------|----------|
| Carbon                      | Oxygen | Hydrogen |
| 90                          | 90     | 30       |
| 75                          | 75     | 25       |
| 75                          | 75     | 20       |
| 70                          | 75     | 25       |
| 70                          | 70     | 5        |
| 70                          | 70     | 0        |
| 65                          | 75     | 25       |
| 60                          | 60     | 15       |
| 45                          | 45     | 5        |
| 10                          | 10     | 0        |

\* Values used in literature<sup>6</sup>

Other settings were kept the same compared to the simulations as presented in the manuscript. Thus, the most stable adsorption energy was used for other reaction intermediates, CO\* was destabilized with 40 kJ/mol and H\* was destabilized with 20 kJ/mol. The simulations were performed with an initial CO<sub>2</sub>:H<sub>2</sub> mixture of 1:4, a total pressure of 1 bar and temperatures between 500 - 800 K.

<sup>6</sup> Zijlstra, B.; Broos, R. J. P.; Chen, W.; Filot, I. A. W.; Hensen, E. J. M. First-Principles Based Microkinetic Modeling of Transient Kinetics of CO Hydrogenation on Cobalt Catalysts. *Catal. Today* **2020**, 342 (October 2018), 131–141. <https://doi.org/10.1016/j.cattod.2019.03.002>.

<sup>13</sup> Science Notes and Projects. <https://sciencenotes.org/list-of-electronegativity-values-of-the-elements> (accessed September 13, 2022).

### Apparent activation energy

In Figure S 58, the apparent activation energies ( $E_{app}$ ) are plotted for each of the four facets with a change in lateral interaction potential. For Ni(211) the apparent activation energy is not effected by the lateral interaction potential at the temperature of interest. For Ni(111) and Ni(110) the differences are subtle and the  $E_{app}$  seems to be converged if the lateral interaction  $>$  C10-O10-H0. The results for Ni(100) are more spread out into three regions. The lowest  $E_{app}$  is obtained when the penalty for hydrogen is very small ( $H = 0$  kJ/mol and  $H = 5$  kJ/mol), which means that compared to C and O containing intermediates relatively much hydrogen is present on the surface (see analysis of the surface coverage at p.79). This means that the hydrogenation of  $C^*$  is more facile. The opposite is true when the penalty for hydrogen is very high ( $H = 25$  kJ/mol and  $H = 30$  kJ/mol). The resulting  $E_{app}$  is higher because it is more difficult to hydrogenate carbonaceous species. The intermediate region is obtained with a hydrogen penalty of 15 and 20 kJ/mol.

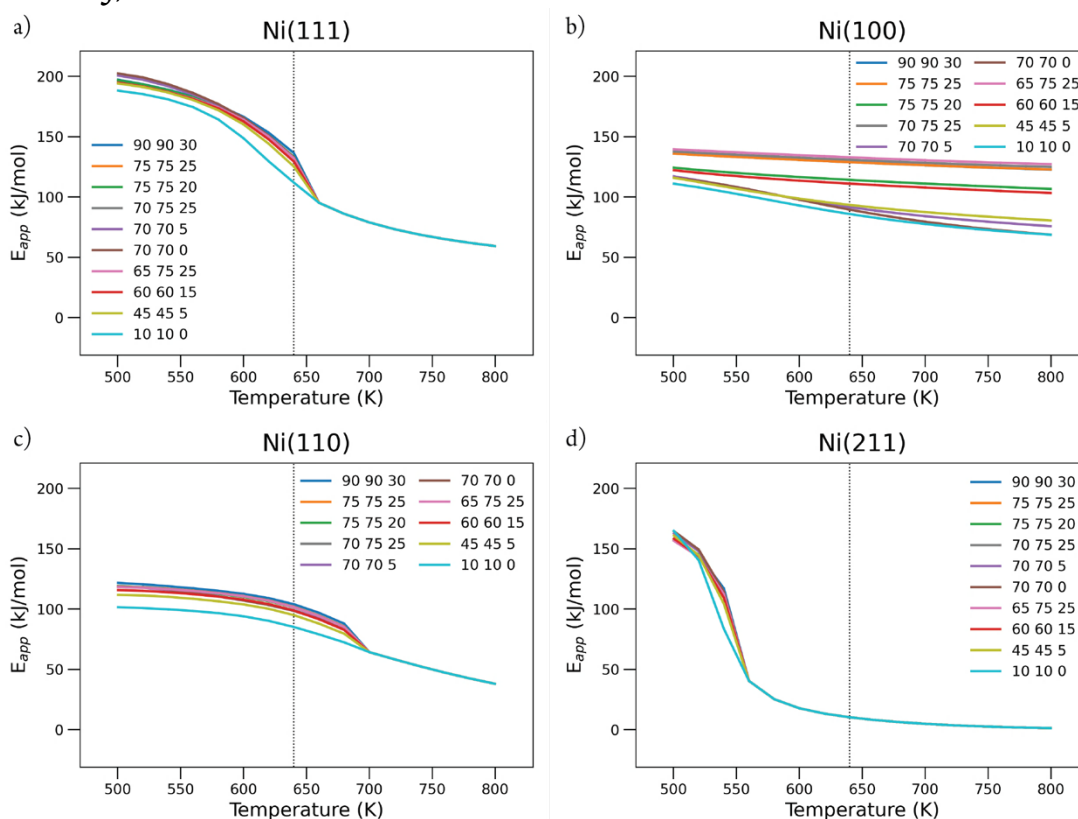

Figure S 58. Apparent activation energy as a function of temperature with different penalties for the lateral interaction potential. In the legend the first, second and third number refer to the lateral interaction penalty for C, O and H, respectively. a) Ni(111), b) Ni(100), c) Ni(110) and d) Ni(211).

### Reaction orders

On the next page the reaction orders in  $CO_2$  and  $H_2$  are plotted as a function of temperature (Figure S 59). Note: the scale of the y-axis differs among different facets. The reaction orders in  $CO_2$  and  $H_2$  are not sensitive on the penalty values for the lateral interaction potential for Ni(211). In case of Ni(111) and Ni(110) the orders are well converged at 640 K when the penalties of the potential  $>$  C10-O10-H0. For Ni(100) results are again spread in three regions, depending on the hydrogen penalty.

## J. Sensitivity Analysis on the Lateral Interaction Potential

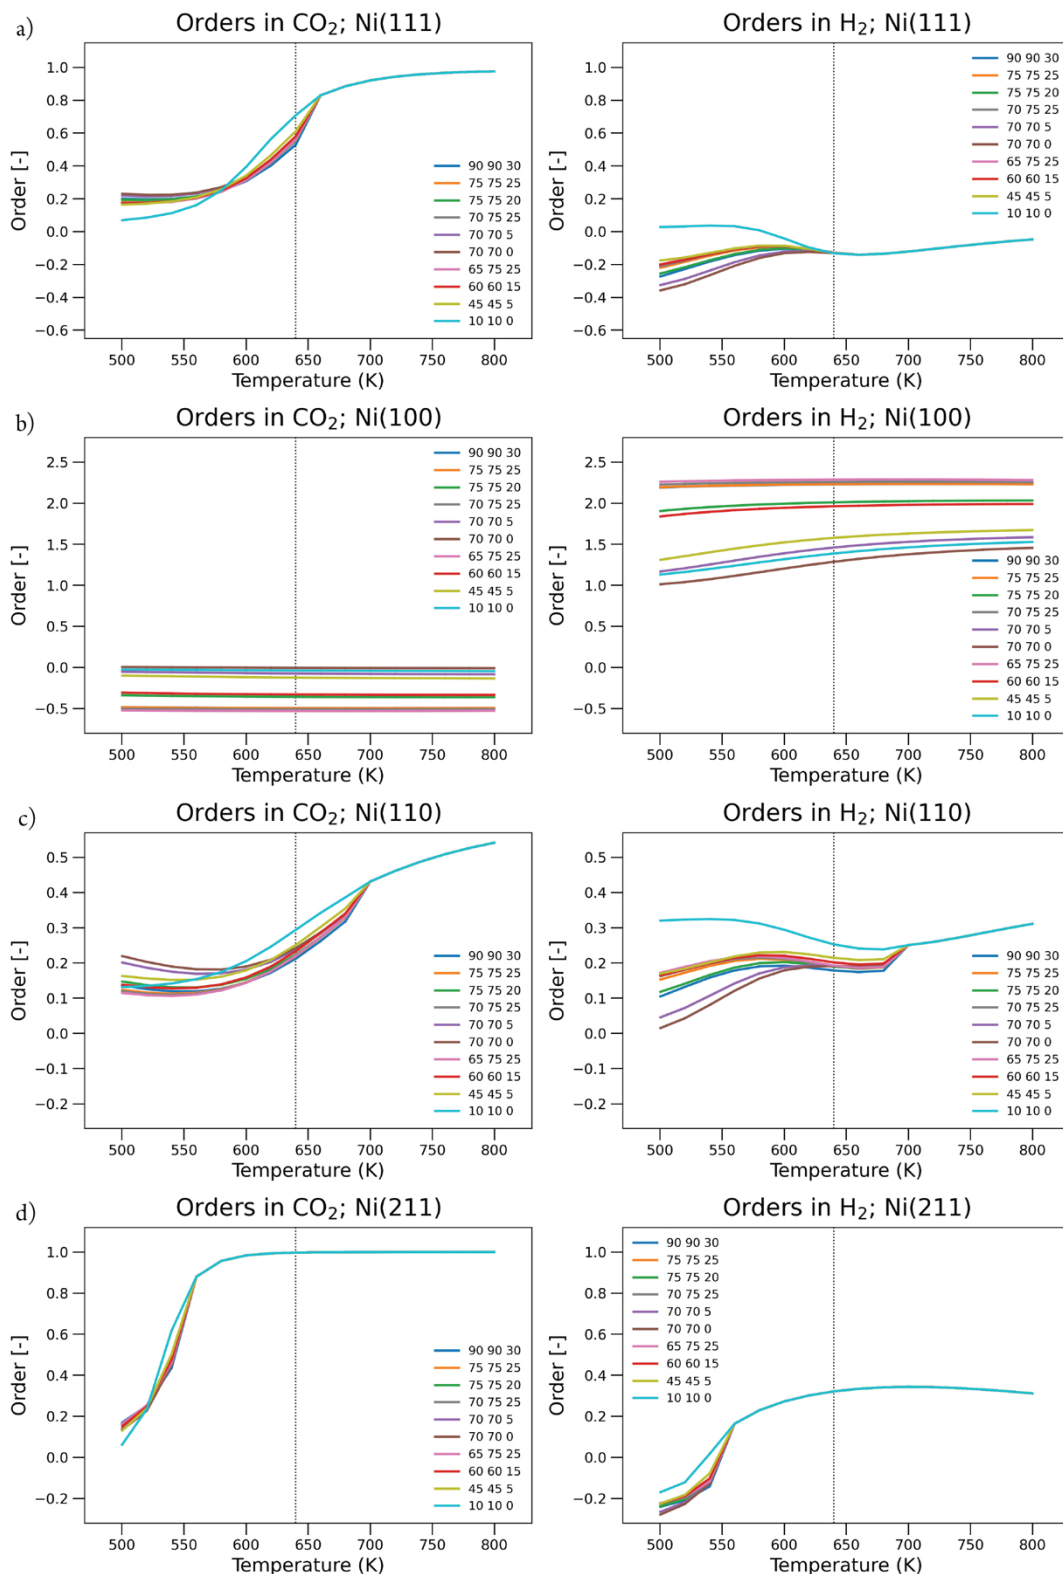

Figure S 59. The reaction orders in CO<sub>2</sub> (left) and H<sub>2</sub> (right) as a function of temperature with different penalties for the lateral interaction potential. In the legend the first, second and third number refer to the lateral interaction penalty for C, O and H, respectively. Note: the scale of the y-axis differs among different facets. a) Ni(111), b) Ni(100), c) Ni(110) and d) Ni(211).

### Coverage

In Figure S 60, the resulting surface coverage on the terrace sites – Ni(111) and Ni(100) – are presented. For Ni(111) it is apparent that the lateral interaction potential is not affecting the trends in surface coverage at 640 K. However, at lower temperatures it is clear that the penalties should have a minimum value ( $> C_{10}-O_{10}-H_0$ ) in order to prevent unphysically high coverage of the surface. For example, at 500 K the surface is covered 40% with  $CO^*$  and 50% of  $H^*$ . In the case of Ni(100) there is a direct effect between the coverage with  $C^*$  and  $H^*$  with a changing potential. This relates back to the fact that the most stable reaction intermediate on Ni(100) is carbon. With the lateral interaction potential from literature<sup>13</sup> ( $C_{60}-O_{60}-H_{15}$ ) the total surface coverage seems to be converged at 75%.

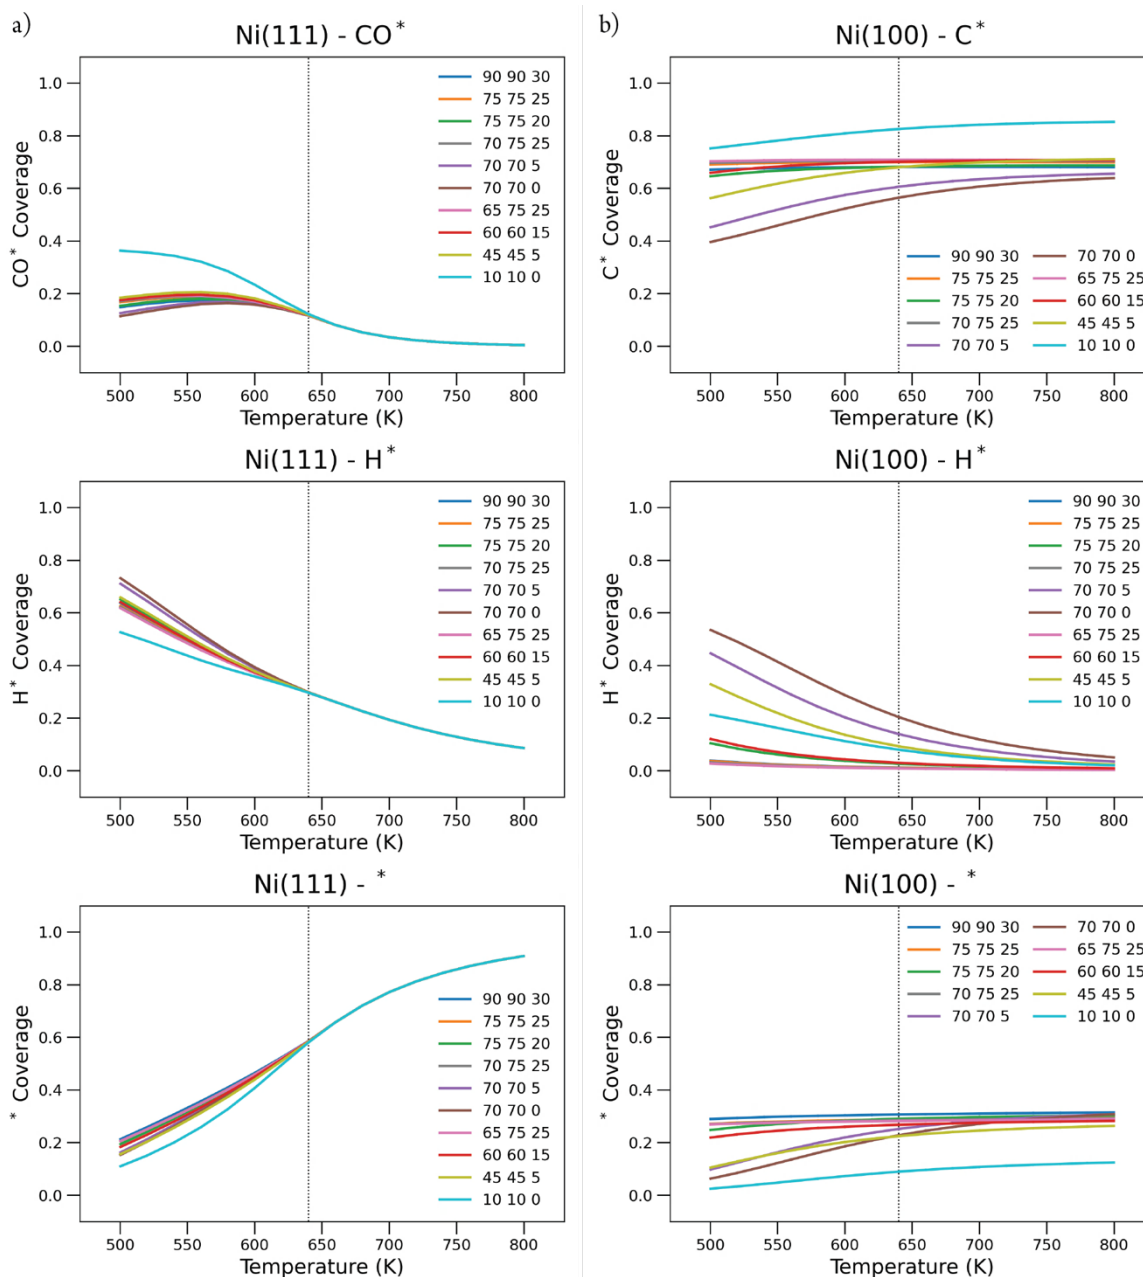

Figure S 60. Surface coverage as a function of temperature with different penalties for the lateral interaction potential. In the legend the first, second and third number refer to the lateral interaction penalty for C, O and H, respectively. a) The surface coverage of  $CO^*$ ,  $H^*$  and  $*$  for Ni(111). b) The surface coverage of  $C^*$ ,  $H^*$  and  $*$  for Ni(100).

## J. Sensitivity Analysis on the Lateral Interaction Potential

The coverage plots obtained for the stepped facets Ni(110) and Ni(211) shown in Figure S 61, clearly reveal that the lateral interaction potential does not affect the trends in the surface coverage.

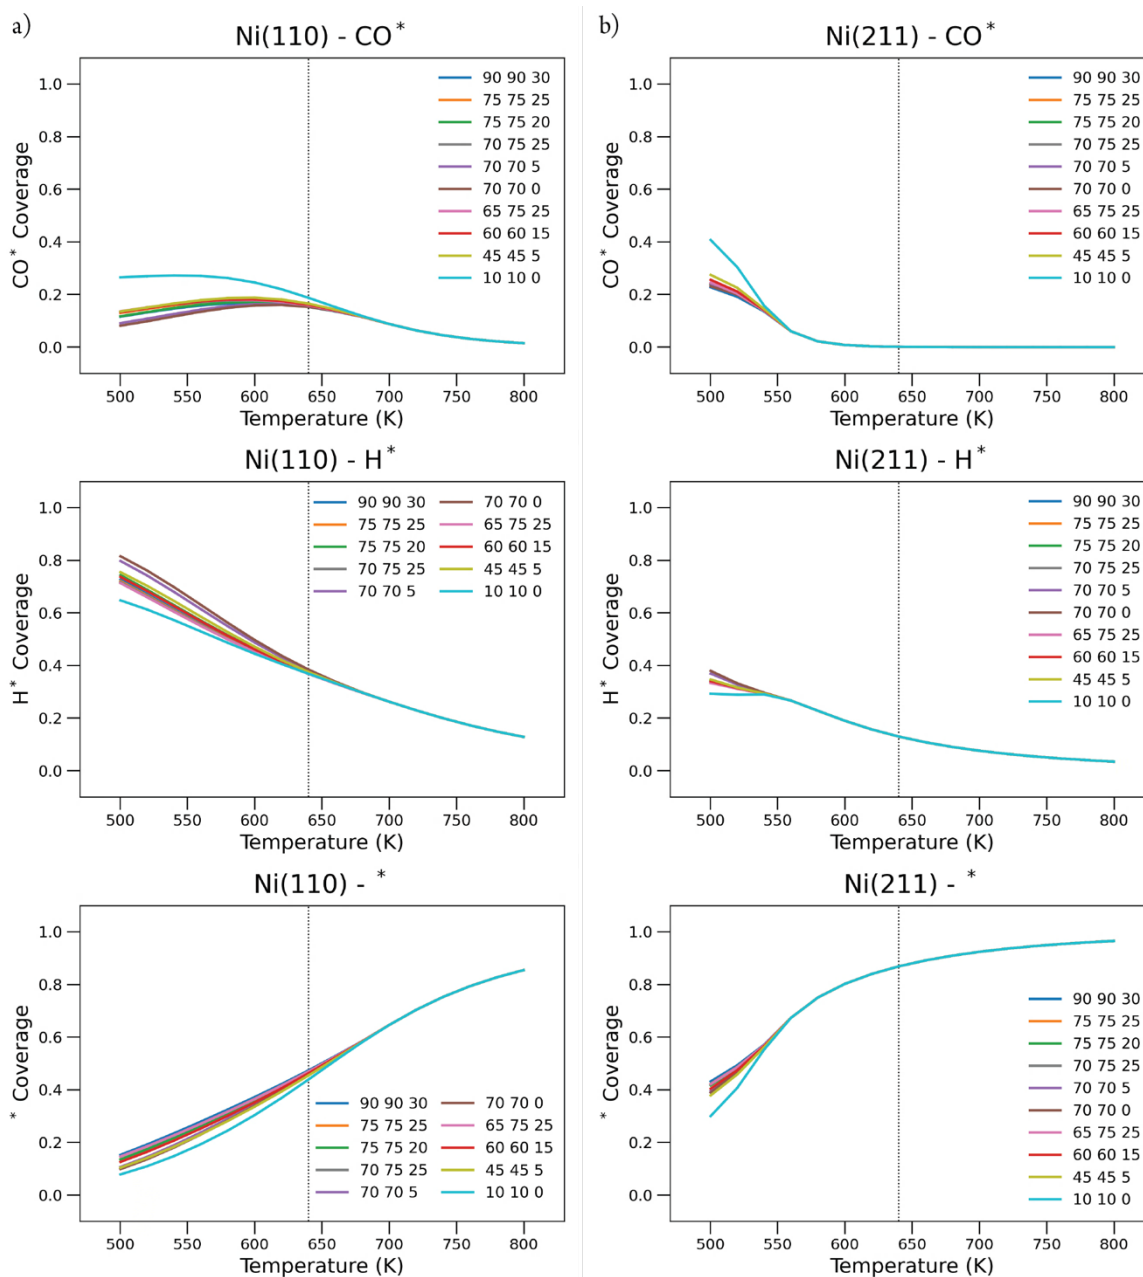

Figure S 61. Surface coverage as a function of temperature with different penalties for the lateral interaction potential. In the legend the first, second and third number refer to the lateral interaction penalty for C, O and H, respectively. The surface coverage of CO\*, H\* and \* for a) Ni(110) and b) Ni(211).

### Conclusion lateral interaction potential

Based on the results in the  $E_{app}$  reaction orders in H<sub>2</sub> and CO<sub>2</sub> and the surface coverage we have seen that the lateral interaction potential applied on a cobalt system<sup>6</sup> is justified to use in our study on nickel.

## K Wulff Constructions

### Wulff Constructed Nanoparticles

The surface density of the different types of active sites as a function of the Wulff constructed nanoparticle size is shown in Figure S 62. On the next page in Table S 24, an overview of the Wulff constructions with their size, number of bulk atoms and corresponding partition of each facet is tabulated.

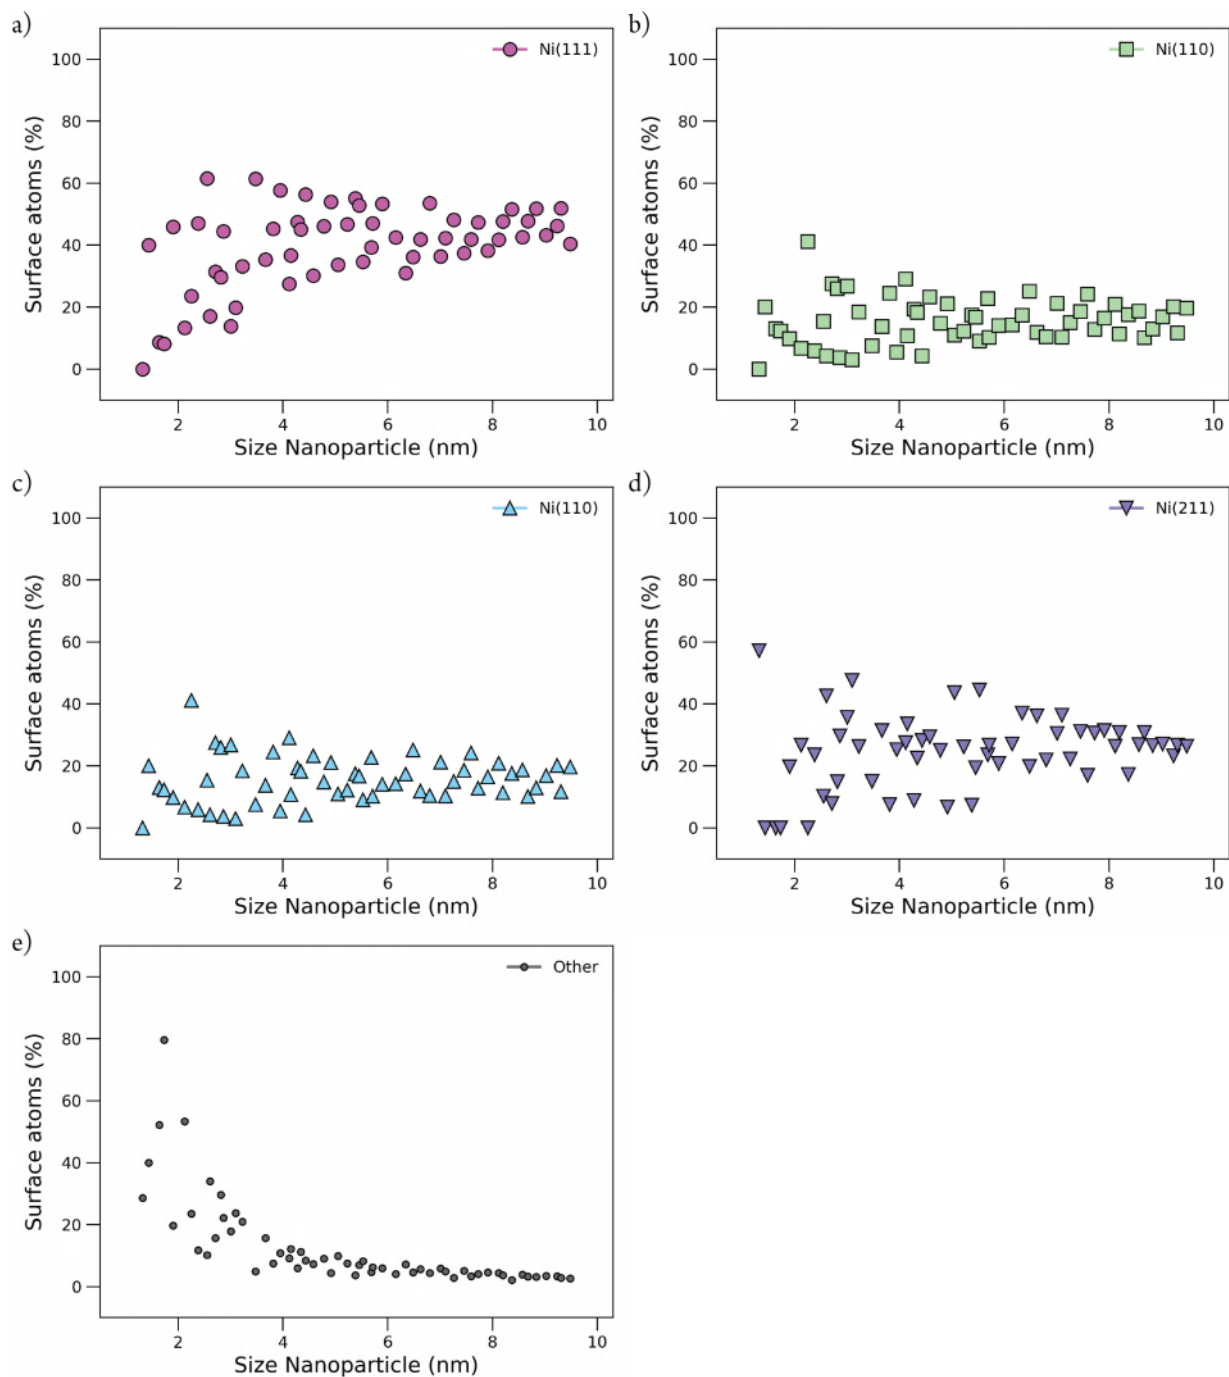

Figure S 62. As a function of the Wulff constructed nanoparticle size the surface density of a) Ni(111), b) Ni(100), c) Ni(110), d) Ni(211) and e) Other atoms.



Table S 24. Overview of Wulff constructed nanoparticles with their size and total number of atoms, number of surface- and bulk-atoms, as well as the corresponding partition of each facet per Wulff constructed nanoparticle.

| Wulff Constructed Nanoparticles |         |         |       |                  |         |         |         |       |
|---------------------------------|---------|---------|-------|------------------|---------|---------|---------|-------|
| Size (nm)                       | # Atoms |         |       | # Atoms assigned |         |         |         |       |
|                                 | Total   | Surface | Bulk  | Ni(111)          | Ni(100) | Ni(110) | Ni(211) | Other |
| 1.03                            | 19      | 18      | 1     | 0                | 0       | 12      | 0       | 6     |
| 1.19                            | 43      | 42      | 1     | 0                | 6       | 12      | 0       | 24    |
| 1.32                            | 55      | 42      | 13    | 0                | 6       | 0       | 24      | 12    |
| 1.44                            | 79      | 60      | 19    | 24               | 0       | 12      | 0       | 24    |
| 1.64                            | 135     | 92      | 43    | 8                | 24      | 12      | 0       | 48    |
| 1.73                            | 141     | 98      | 43    | 8                | 0       | 12      | 0       | 78    |
| 1.90                            | 201     | 122     | 79    | 56               | 6       | 12      | 24      | 24    |
| 2.12                            | 321     | 180     | 141   | 24               | 0       | 12      | 48      | 96    |
| 2.26                            | 369     | 204     | 165   | 48               | 24      | 84      | 0       | 48    |
| 2.38                            | 405     | 204     | 201   | 96               | 24      | 12      | 48      | 24    |
| 2.55                            | 459     | 234     | 225   | 144              | 6       | 36      | 24      | 24    |
| 2.61                            | 603     | 282     | 321   | 48               | 6       | 12      | 120     | 96    |
| 2.71                            | 675     | 306     | 369   | 96               | 54      | 84      | 24      | 48    |
| 2.82                            | 699     | 324     | 375   | 96               | 0       | 84      | 48      | 96    |
| 2.87                            | 735     | 324     | 411   | 144              | 0       | 12      | 96      | 72    |
| 3.01                            | 959     | 404     | 555   | 56               | 24      | 108     | 144     | 72    |
| 3.10                            | 1007    | 404     | 603   | 80               | 24      | 12      | 192     | 96    |
| 3.23                            | 1157    | 458     | 699   | 152              | 6       | 84      | 120     | 96    |
| 3.48                            | 1289    | 482     | 807   | 296              | 54      | 36      | 72      | 24    |
| 3.67                            | 1769    | 612     | 1157  | 216              | 24      | 84      | 192     | 96    |
| 3.81                            | 1865    | 636     | 1229  | 288              | 96      | 156     | 48      | 48    |
| 3.95                            | 1979    | 666     | 1313  | 384              | 6       | 36      | 168     | 72    |
| 4.12                            | 2459    | 786     | 1673  | 216              | 54      | 228     | 216     | 72    |
| 4.15                            | 2555    | 786     | 1769  | 288              | 54      | 84      | 264     | 96    |
| 4.28                            | 2675    | 810     | 1865  | 384              | 150     | 156     | 72      | 48    |
| 4.34                            | 2771    | 852     | 1919  | 384              | 24      | 156     | 192     | 96    |
| 4.43                            | 2831    | 852     | 1979  | 480              | 24      | 36      | 240     | 72    |
| 4.58                            | 3439    | 980     | 2459  | 296              | 96      | 228     | 288     | 72    |
| 4.78                            | 3829    | 1058    | 2771  | 488              | 54      | 156     | 264     | 96    |
| 4.92                            | 3949    | 1082    | 2867  | 584              | 150     | 228     | 72      | 48    |
| 5.05                            | 4585    | 1212    | 3373  | 408              | 24      | 132     | 528     | 120   |
| 5.23                            | 5113    | 1284    | 3829  | 600              | 96      | 156     | 336     | 96    |
| 5.38                            | 5257    | 1308    | 3949  | 720              | 216     | 228     | 96      | 48    |
| 5.45                            | 5407    | 1362    | 4045  | 720              | 54      | 228     | 264     | 96    |
| 5.53                            | 6043    | 1458    | 4585  | 504              | 54      | 132     | 648     | 120   |
| 5.69                            | 6499    | 1530    | 4969  | 600              | 150     | 348     | 360     | 72    |
| 5.71                            | 6643    | 1530    | 5113  | 720              | 150     | 156     | 408     | 96    |
| 5.89                            | 7027    | 1620    | 5407  | 864              | 96      | 228     | 336     | 96    |
| 6.15                            | 8127    | 1772    | 6355  | 752              | 216     | 252     | 480     | 72    |
| 6.34                            | 9621    | 2010    | 7611  | 624              | 150     | 348     | 744     | 144   |
| 6.49                            | 9957    | 2058    | 7899  | 744              | 294     | 516     | 408     | 96    |
| 6.63                            | 10401   | 2124    | 8277  | 888              | 96      | 252     | 768     | 120   |
| 6.80                            | 11121   | 2196    | 8925  | 1176             | 216     | 228     | 480     | 96    |
| 7.01                            | 12615   | 2442    | 10173 | 888              | 150     | 516     | 744     | 144   |
| 7.10                            | 12843   | 2442    | 10401 | 1032             | 150     | 252     | 888     | 120   |
| 7.26                            | 13251   | 2490    | 10761 | 1200             | 294     | 372     | 552     | 72    |
| 7.46                            | 15395   | 2780    | 12615 | 1040             | 216     | 516     | 864     | 144   |
| 7.59                            | 15779   | 2828    | 12951 | 1184             | 384     | 684     | 480     | 96    |
| 7.73                            | 16373   | 2906    | 13467 | 1376             | 150     | 372     | 888     | 120   |
| 7.91                            | 18533   | 3138    | 15395 | 1200             | 294     | 516     | 984     | 144   |
| 8.12                            | 19349   | 3276    | 16073 | 1368             | 216     | 684     | 864     | 144   |
| 8.20                            | 19649   | 3276    | 16373 | 1560             | 216     | 372     | 1008    | 120   |
| 8.37                            | 20321   | 3348    | 16973 | 1728             | 384     | 588     | 576     | 72    |
| 8.57                            | 23015   | 3666    | 19349 | 1560             | 294     | 684     | 984     | 144   |
| 8.67                            | 23315   | 3666    | 19649 | 1752             | 294     | 372     | 1128    | 120   |
| 8.84                            | 24203   | 3804    | 20399 | 1968             | 216     | 492     | 1008    | 120   |
| 9.02                            | 27091   | 4076    | 23015 | 1760             | 384     | 684     | 1104    | 144   |
| 9.23                            | 28057   | 4226    | 23831 | 1952             | 294     | 852     | 984     | 144   |
| 9.30                            | 28429   | 4226    | 24203 | 2192             | 294     | 492     | 1128    | 120   |
| 9.48                            | 30637   | 4458    | 26179 | 1800             | 486     | 876     | 1176    | 120   |

## Turnover Frequency

In Figure S 63a-d, the contribution of each nickel facet to the turnover frequency (TOF) of the Wulff constructed nanoparticles is plotted. The summation of these TOFs is shown in Figure S 63e.

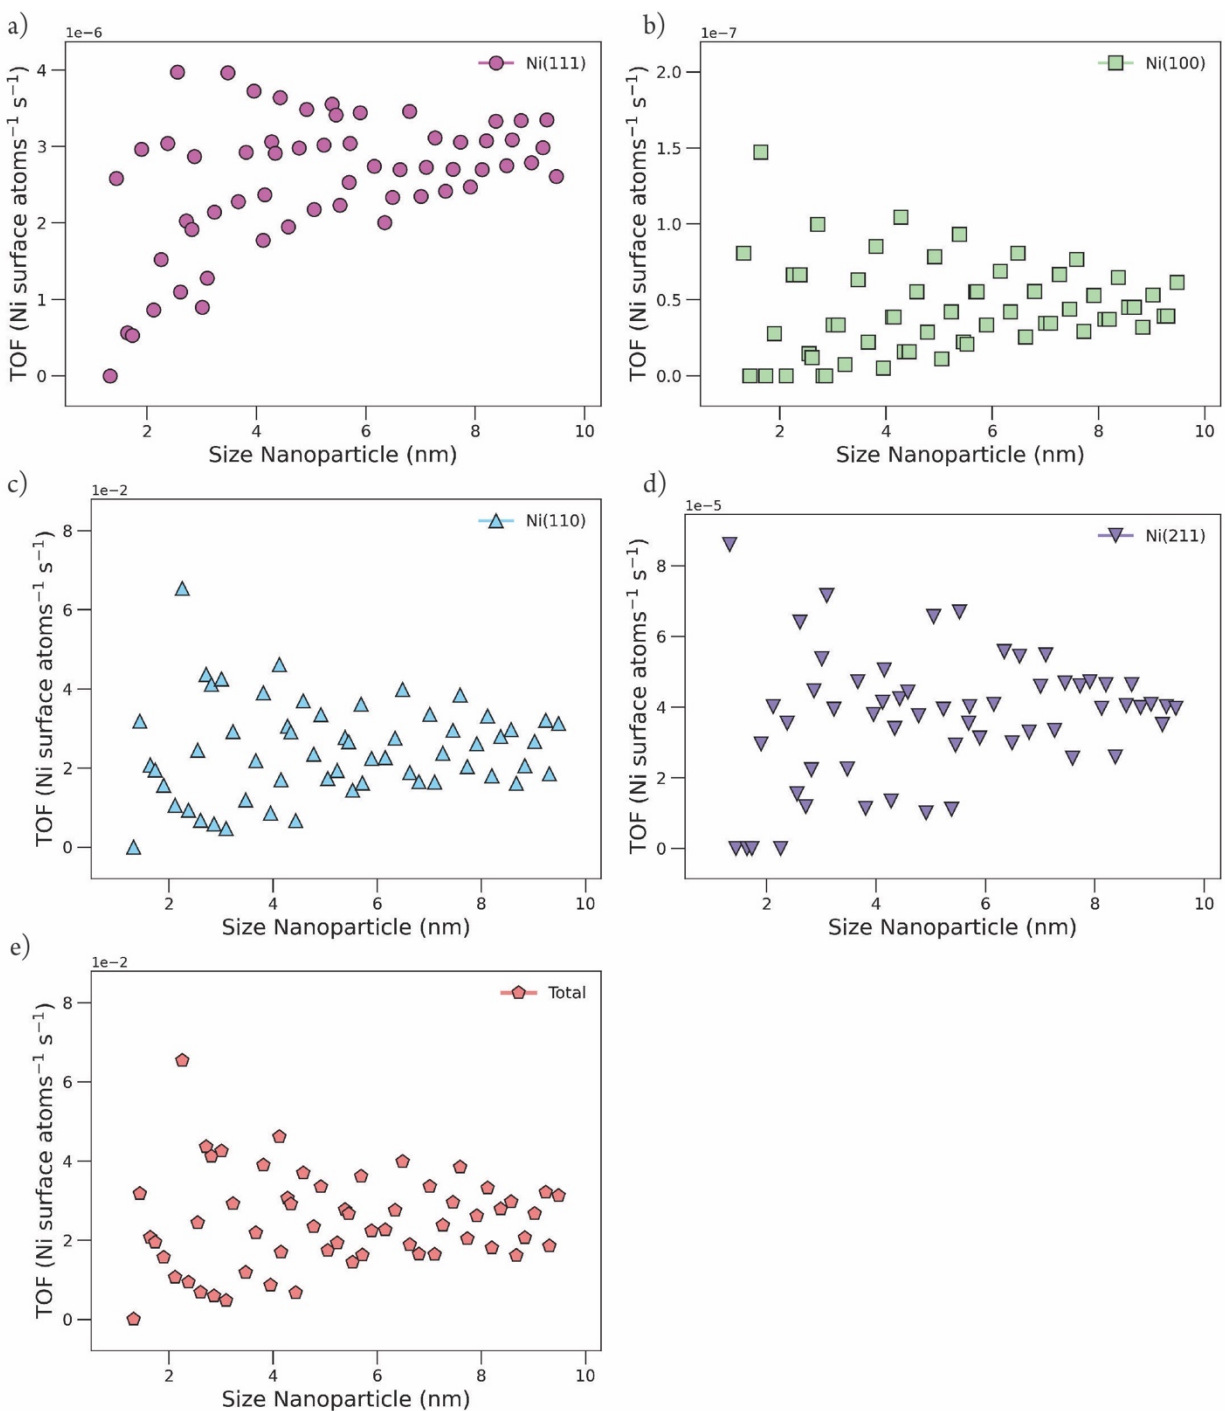

Figure S 63. As a function of the size of the Wulff constructed nanoparticles, the contribution of each nickel facets to the turnover frequency (TOF) of the Wulff constructions is plotted for a) Ni(111), b) Ni(100), c) Ni(110), d) Ni(211). The summation of these TOFs is plotted in e). Note: the scale of the y-axis differs among different facets.

In Figure S 64 we show how an overall trend is obtained from the TOF plots. In Figure S 64a the total TOF (same data as depicted in Figure S 63e on the previous page) is represented with a continuous line. In Figure S 64b we calculated the moving average using a window of 2 after which a polynomial with order 10 was applied in Figure S 64c.

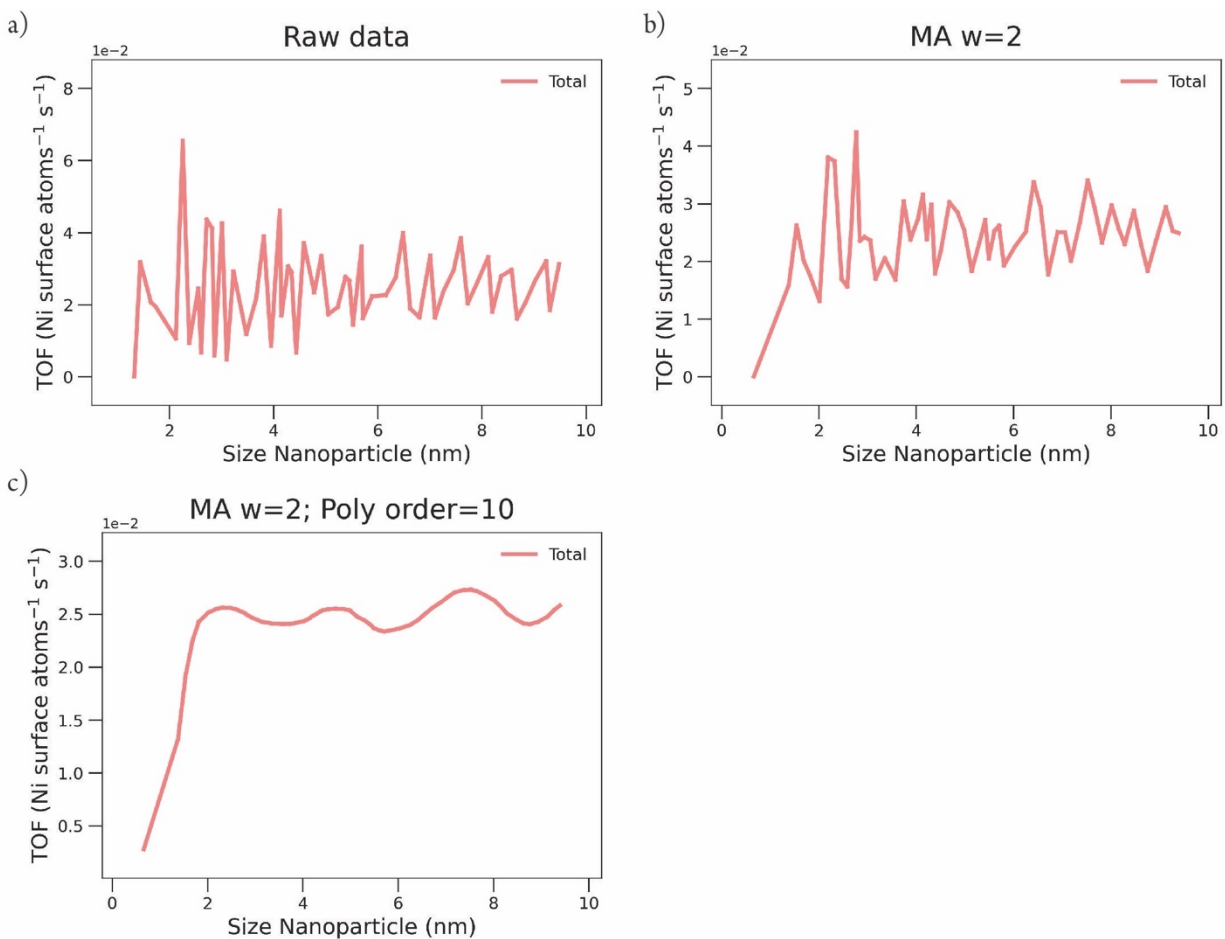

Figure S 64. The turnover frequency (TOF) of the Wulff constructed nickel nanoparticles as a function of its size is shown in a), obtained by summation of the TOFs for Ni(111), Ni(100), Ni(110) and Ni(211). A moving average with window 2 was taken for the TOF and plotted in b). The plot shown in c) represents the total TOF, with moving average of window 2 and smoothed using a polynomial order 10.

The shape of the smoothed TOF plot (Figure S 64c) is not yet comparable to the TOF plot obtained from the catalytic CO<sub>2</sub> hydrogenation over Ni/SiO<sub>2</sub> catalysts, as shown in Fig.1a of the manuscript. Therefore, it can be assumed that the under coordinated atoms do have some activity.

The activity of the undercoordinated atoms was estimated by a first order approximation. Therefore, the under coordinated atoms were assigned with zero activity, with the activity of Ni(211) atoms and with 0.01, 0.1, 0.5 and 1 times the activity of Ni(110) atoms. The resulting TOF plots are depicted in Figure S 65. From this figure it is clear that the characteristic optimum at 2 nm observed in experiments becomes clearly visible when the undercoordinated atoms are assigned with 0.5 or 1 times the activity of Ni(110) atoms.

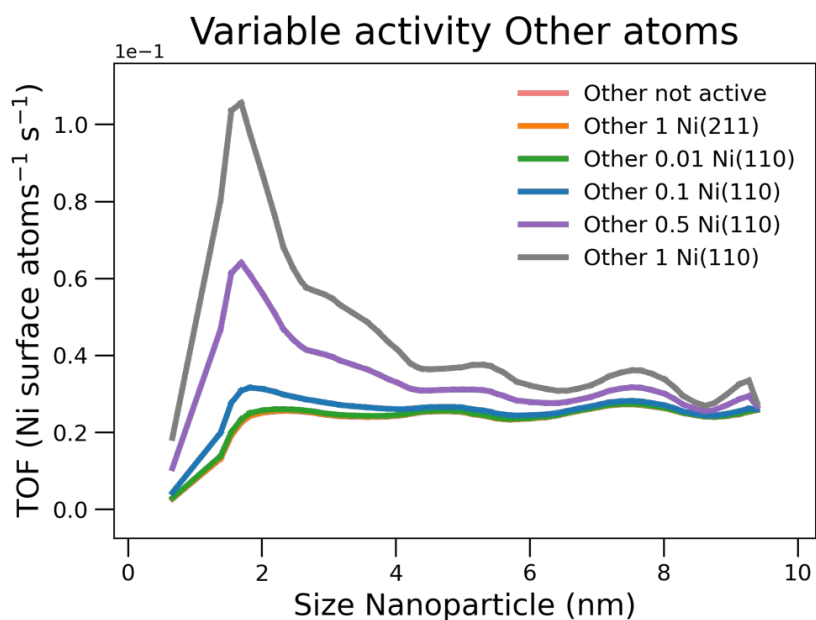

Figure S 65. The turnover frequency (TOF) of the Wulff constructed nickel nanoparticles as a function of its size, obtained by summation of the TOFs of Ni(111), Ni(100), Ni(110) and Ni(211), with an increasing activity for the Other atoms.
